1 **IRF4 haploinsufficiency in a family with Whipple's disease**

2 Antoine Guérin, M.Sc.,<sup>1,2</sup> Gaspard Kerner, M.Sc.,<sup>1,2,\*</sup> Nico Marr, Ph.D.,<sup>3,\*</sup>  
3 Janet G. Markle, Ph.D.,<sup>4,§</sup> Florence Fenollar, M.D., Ph.D.,<sup>5,§</sup> Natalie Wong, B. Sc. (Hons),<sup>6,7,§</sup>  
4 Sabri Boughorbel, Ph.D.,<sup>3,§</sup> Danielle T. Avery, B. Sc.,<sup>6,7,§</sup> Cindy S. Ma, Ph.D.,<sup>6,7,§</sup>  
5 Salim Bougarn, Ph.D.,<sup>3,§</sup> Matthieu Bouaziz, Ph.D.,<sup>1,2</sup> Vivien Beziat, Ph.D.,<sup>1,2</sup>  
6 Erika Della Mina, Ph.D.,<sup>1,2</sup> Tomi Lazarov, B.Sc.,<sup>8</sup> Lisa Worley, B.Sc. (Hons),<sup>6,7</sup>  
7 Tina Nguyen, B.Sc. (Hons),<sup>6,7</sup> Etienne Patin, Ph.D.,<sup>9,10,11</sup> Caroline Deswarte, M.Sc.,<sup>1,2</sup>  
8 Rubén Martínez-Barricarte, Ph.D.,<sup>4</sup> Soraya Boucherit, M.D.,<sup>1,2</sup> Xavier Ayrat, M.D.,<sup>12</sup>  
9 Sophie Edouard, PharmD.,<sup>5</sup> Stéphanie Boisson-Dupuis, Ph.D.,<sup>1,2,4</sup> Vimel Rattina, M.Sc.,<sup>1,2</sup>  
10 Benedetta Bigio, M.Sc.,<sup>4</sup> Guillaume Vogt, Ph.D.,<sup>2</sup> Frédéric Geissmann, M.D., Ph.D.,<sup>8,13,°</sup>  
11 Lluís Quintana-Murci, Ph.D.,<sup>9,10,11,°</sup> Damien Chaussabel, Ph.D.,<sup>3,°</sup> Stuart G. Tangye, Ph.D.,<sup>6,7,°</sup>  
12 Didier Raoult, M.D., Ph.D.,<sup>5,#</sup> Laurent Abel, M.D., Ph.D.,<sup>1,2,4,#</sup>  
13 Jacinta Bustamante, M.D., Ph.D.,<sup>1,2,4,14,#</sup> and Jean-Laurent Casanova, M.D., Ph.D.<sup>1,2,4,15,16,#,@</sup>  
14

- 15 1. Laboratory of Human Genetics of Infectious Diseases, Necker Branch, INSERM  
16 U1163, 75015 Paris, France, EU.
- 17 2. Paris Descartes University, Imagine Institute, 75015 Paris, France, EU.
- 18 3. Sidra Medical and Research Center, Doha, Qatar.
- 19 4. St. Giles Laboratory of Human Genetics of Infectious Diseases, Rockefeller Branch,  
20 The Rockefeller University, New York, NY 10065, USA.
- 21 5. Research Unit of Infectious and Tropical Emerging Diseases, University Aix-  
22 Marseille, URMITE, UM63, CNRS 7278, IRD 198, 13005 Marseille, France, EU.
- 23 6. Immunology Division, Garvan Institute of Medical Research, Darlinghurst, NSW  
24 2010, Australia.
- 25 7. St Vincent's Clinical School, Faculty of Medicine, UNSW Sydney NSW 2010,  
26 Australia.
- 27 8. Immunology Program and Ludwig Center, Memorial Sloan Kettering Cancer Center,  
28 New York, NY 10065, USA.
- 29 9. Human Evolutionary Genetics, Department of Genomes & Genetics, Institut Pasteur,  
30 Paris 75015, France, EU.
- 31 10. CNRS URA3012, 75015 Paris, France, EU.
- 32 11. Center of Bioinformatics, Biostatistics and Integrative Biology, Institut Pasteur,  
33 75015 Paris, France, EU.
- 34 12. Rheumatology Unit, Cochin Hospital, 75014 Paris, France, EU.
- 35 13. Weill Cornell Graduate School of Medical Sciences, New York, NY 10065, USA.
- 36 14. Center for the Study of Primary Immunodeficiencies, Assistance Publique-Hôpitaux  
37 de Paris, Necker Hospital for Sick Children, 75015 Paris, France, EU.
- 38 15. Pediatric Hematology and Immunology Unit, Assistance Publique-Hôpitaux de Paris,  
39 Necker Hospital for Sick Children, 75015 Paris, France, EU.
- 40 16. Howard Hughes Medical Institute, New York, NY 10065 USA.

41 \*,§,°,# Equal contributions

42 @ Correspondence: [casanova@rockefeller.edu](mailto:casanova@rockefeller.edu)

43 **Keywords:** Whipple's disease, primary immunodeficiency, IRF4, haploinsufficiency

44 **Running title:** Whipple's disease and IRF4 deficiency

45 **Conflict of interest statement:** The authors have no conflict of interest to declare.

## 1 **Abstract**

2           The pathogenesis of Whipple's disease (WD) remains largely unknown, as WD strikes  
3 only a very small minority of the individuals infected with *Tropheryma whipplei* (Tw).  
4 Asymptomatic carriage of Tw is less rare. We studied a large multiplex French kindred,  
5 containing four otherwise healthy WD patients (mean age: 76.7 years) and five healthy carriers  
6 of Tw (mean age: 55 years). We used a strategy combining genome-wide linkage analysis and  
7 whole-exome sequencing to test the hypothesis that WD is inherited in an autosomal dominant  
8 (AD) manner, with age-dependent incomplete penetrance. WD was linked to 12 genomic  
9 regions covering 27 megabases in the four patients. These regions contained only one very rare  
10 non-synonymous variation: the R98W variant of *IRF4*. The five Tw carriers were heterozygous  
11 for R98W. Interferon regulatory factor 4 (IRF4) is a transcription factor with pleiotropic roles  
12 in immunity. We showed that R98W was a loss-of-function allele, like only five other  
13 exceedingly rare *IRF4* alleles of a total of 39 rare and common non-synonymous alleles tested.  
14 Furthermore, heterozygosity for R98W led to a distinctive pattern of transcription in leukocytes  
15 following stimulation with BCG or Tw. Finally, we found that *IRF4* had evolved under  
16 purifying selection and that R98W was not dominant-negative, suggesting that the IRF4  
17 deficiency in this kindred was due to haploinsufficiency. Overall, haploinsufficiency at the  
18 *IRF4* locus selectively underlies WD in this multiplex kindred. This deficiency displays AD  
19 inheritance with incomplete penetrance, and chronic carriage probably precedes WD by several  
20 decades in Tw-infected heterozygotes.

21

## 1           **Introduction**

2           Whipple's disease (WD) was first described as an intestinal inflammatory disease by  
3           George H. Whipple in 1907 (1). Its infectious origin was suspected in 1961 (2), and the causal  
4           microbe, *Tropheryma whipplei* (Tw), a Gram-positive actinomycete, was detected by PCR in  
5           1992 (3), and cultured in 2000 (4). Tw is probably transmitted between humans via the oro-oral  
6           or feco-oral routes. WD is a chronic condition with a late onset (mean age at onset: 55 years)  
7           (5) affecting multiple organs. The clinical manifestations of classical WD are arthralgia,  
8           diarrhea, abdominal pain, and weight loss (6-10). However, about 25% of WD patients display  
9           no gastrointestinal or osteoarticular symptoms, instead presenting with cardiac and/or  
10          neurological manifestations (8, 11-14). WD is fatal if left untreated, and relapses occur in 2 to  
11          33% of treated cases, even after prolonged appropriate antibiotic treatment (15), (16). WD is  
12          rare and has been estimated to affect about one in a million individuals (6, 17, 18). However,  
13          about two thousand cases have been reported in at least nine countries worldwide, mostly in  
14          North America and Western Europe (11, 19-23). Chronic asymptomatic carriage of Tw is  
15          common in the general population, and this bacterium has been detected in feces, saliva, and  
16          intestinal mucosae. The prevalence of Tw carriage in the feces has been estimated at 2 to 11%  
17          for the general population, but can reach 26% in sewer workers and 37% in relatives of patients  
18          and carriers (11, 14, 17, 24-28).

19          Seroprevalence for specific antibodies against Tw in the general population varies from  
20          50% in France to 70% in Senegal (4, 11, 14, 29). At least 75% of infected individuals clear Tw  
21          primary infections, but a minority (<25%) become asymptomatic carriers, a small proportion  
22          of whom develop WD (~0.01%) (30). Tw infection is therefore necessary, but not sufficient,  
23          for WD development and it is unclear whether prolonged asymptomatic carriage necessarily  
24          precedes WD. The hypothesis that WD results from the emergence of a more pathogenic clonal  
25          strain of Tw was not supported by bacterial genotyping (31). WD mostly affects individuals of

1 European origin, but does not seem to be favored by specific environments. WD is typically  
2 sporadic, but six multiplex kindreds have been reported, with cases often diagnosed years apart,  
3 suggesting a possible genetic component (8, 17, 32). WD patients are not prone to other severe  
4 infections (33). Moreover, WD has never been reported in patients with conventional primary  
5 immunodeficiencies (PIDs) (34). This situation is reminiscent of other sporadic severe  
6 infections, such as herpes simplex virus-1 encephalitis, severe influenza, recurrent rhinovirus  
7 infection, and severe varicella zoster disease, which are caused by single-gene inborn errors of  
8 immunity in some patients (35-38). We therefore hypothesized that WD might be due to  
9 monogenic inborn errors of immunity to Tw, with age-dependent incomplete penetrance.

10

## 11 **Results**

### 12 **A multiplex kindred with WD**

13 We investigated four related patients diagnosed with WD (P1, P2, P3, and P4) with a  
14 mean age at diagnosis of 58 years. They belong to a large non-consanguineous French kindred  
15 (Figure 1, A). The proband (P1), a 69-year-old woman, presented with right knee arthritis in  
16 2011, after recurrent episodes of arthritis of the right knee since 1980. Tw was detected in the  
17 synovial fluid by PCR and culture, but not in saliva, feces, or small intestine tissue by PCR.  
18 Treatment with doxycycline and hydroxychloroquine was effective. At last follow-up, in 2016,  
19 P1 was well and Tw PCR on saliva and feces was negative. P2, a second cousin of P1, is a 76-  
20 year-old woman with classical WD diagnosed at 37 years of age in 1978 by periodic acid-  
21 Schiff (PAS) staining of a small intestine biopsy specimen. She was treated with  
22 sulfamethoxazole/trimethoprim. At last follow-up, in 2016, Tw PCR on saliva and feces was  
23 positive. P3, the father of P1, is a 92-year-old man with classical WD diagnosed at 62 years of  
24 age, in 1987, based on positive PAS staining of a small intestine biopsy specimen. Long-term

1 sulfamethoxazole/trimethoprim treatment led to complete clinical and bacteriological  
2 remission. P4, the brother of P2, is a 70-year-old man who consulted in 2015 for arthralgia of  
3 the knees and right ulna-carpal joints. PCR and culture did not detect Tw in saliva and feces,  
4 but serological tests for Tw were positive. Treatment with methotrexate and steroids was  
5 initiated before antibiotics, the effect of which is currently being evaluated. All four patients  
6 are otherwise healthy. Saliva and/or feces samples from 18 other members of the family were  
7 tested for Tw (Figure 1, A; table S1). Five individuals are chronic carriers (mean age: 55 years)  
8 and 13 tested negative (mean age: 38 years). Nine additional relatives could not be tested. The  
9 distribution of WD in this kindred was suggestive of an AD trait with incomplete penetrance.

10

### 11 **A private heterozygous missense *IRF4* variant segregates with WD**

12 We analyzed the familial segregation of WD by genome-wide linkage (GWL), using  
13 information from both genome-wide single-nucleotide polymorphism (SNP) microarrays and  
14 whole-exome sequencing (WES) (39). Multipoint linkage analysis was performed under an AD  
15 model with a very rare disease-causing allele ( $<10^{-5}$ ) and age-dependent incomplete penetrance  
16 (see Supplementary Results). Twelve chromosomal regions linked to WD were identified on  
17 chromosomes 1 (x3), 2, 3, 6, 7, 8, 10, 11, 12 and 17, with a LOD score close ( $>1.90$ ) to the  
18 maximum expected value (1.95) (Figure S1, A). These regions covered 27.18 Mb and included  
19 263 protein-coding genes. WES data analysis for these 263 genes identified 54 heterozygous  
20 non-synonymous coding variants common to all four WD patients (Table S2). Only one, a  
21 variant of the *IRF4* gene encoding a transcription factor, member of the *IRF* family (40), and  
22 located in a 200 kb linked region on chromosome 6 (Figure S1 A, B), was very rare, and was  
23 even found to be private [not found in the GnomAD database, <http://gnomad.broadinstitute.org>,  
24 or in our own WES database (HGID)], whereas all other variants had a frequency  $>0.001$ , which

1 is inconsistent with the frequency of WD and our hypothesis of a very rare ( $<10^{-5}$ ) deleterious  
2 heterozygous allele. The variant is a c.292 C>T substitution in exon 3 of *IRF4*, replacing the  
3 arginine residue in position 98 with a tryptophan residue (R98W) (Figure 1, A, B, C). *IRF4* is  
4 a transcription factor with an important pleiotropic role in innate and adaptive immunity, at  
5 least in mice (41). Mice heterozygous for a null *Irf4* mutation have not been studied, but  
6 homozygous null mice have various T- and B-cell abnormalities and are susceptible to both  
7 *Leishmania* and lymphocytic choriomeningitis virus (see Supplementary Results) (42-47). We  
8 confirmed the *IRF4* R98W mutation by Sanger sequencing genomic DNA from the blood of  
9 the four WD patients (Figure 1, C). Thirteen relatives of the WD patients were WT/WT at the  
10 *IRF4* locus, and 10 of these relatives (77%) tested negative for Tw carriage. Eight other relatives  
11 were heterozygous for the *IRF4* R98W mutation, five of whom (62.5%) were Tw carriers (mean  
12 age: 55 years) (Figure 1, A; table S1). Overall, 12 individuals from the kindred, including the  
13 four patients, the five chronic carriers of Tw, two non-carriers of Tw and one relative not tested  
14 for Tw, were heterozygous for *IRF4* R98W (Figure 1, A; table S1). The familial segregation of  
15 the *IRF4* R98W allele was therefore consistent with an AD pattern of WD inheritance with  
16 incomplete penetrance. Chronic Tw carriage also followed an AD mode of inheritance.

17

### 18 **R98W is predicted to be loss-of-function, unlike most other IRF4 variants**

19 The R98 residue in the DNA-binding domain (DBD) of *IRF4* is highly conserved in the  
20 12 species for which *IRF4* was sequenced (Figure 1, B, D). It has been suggested that this  
21 residue is essential for *IRF4* DNA-binding activity, because the R98A-C99A double mutant is  
22 loss-of-function (48, 49). The R98W mutation is predicted to be damaging by multiple  
23 programs (50); it has a CADD score of R98W (26.5), well above the mutation significance  
24 cutoff (MSC) of *IRF4* (11.125) (Figure S2) (50, 51). The R98W variant was not present in the  
25 GnomAD database or our in-house HGID database of more than 4,000 exomes from patients

1 with various infectious diseases. The mutant allele was not found in the sequences for the  
2 CEPH-HGDP panel of 1,052 controls from 52 ethnic groups, or in 100 French controls,  
3 confirming that this variant was very rare, probably private to this kindred. Therefore, the minor  
4 allele frequency (MAF) of this private allele is  $<4 \times 10^{-6}$ . Moreover, the *IRF4* gene has a gene  
5 damage index (GDI) of 2.85, a neutrality index score of 0.15 (52), and a purifying selection  $f$   
6 parameter of 0.32 (among the  $<10\%$  of genes in the genome subject to the greatest constraint;  
7 Figure S3A), strongly suggesting that *IRF4* has evolved under purifying selection (i.e., strong  
8 evolutionary constraints) (53). Biologically disruptive heterozygous mutations of *IRF4* are  
9 therefore likely to have clinical effects. We identified 156 other high-confidence heterozygous  
10 non-synonymous coding or splice variants of *IRF4* (Table S3) in public (GnomAD: 153  
11 variants, all with  $MAF < 0.009$ ) and HGID (3 variants) databases: 147 were missense (two were  
12 also found in the homozygous state), four were frameshift indels, three were in-frame indels,  
13 one was a nonsense variant, and one was an essential splice variant. Up to 150 of the 156  
14 variants are predicted to be benign, whereas only six were predicted to be potentially loss-of-  
15 function (LOF) according to the GnomAD classification. Comparison of the CADD score and  
16 MAF of these *IRF4* variants, showed R98W to have the second highest CADD score of the four  
17 variants with a  $MAF < 4 \times 10^{-6}$  (Figure S2). These findings suggest that the private heterozygous  
18 *IRF4* variant of this kindred is biochemically deleterious, unlike most other rare ( $MAF < 0.009$ )  
19 non-synonymous variants in the general population, 150 of 156 of which were predicted to be  
20 benign (54).

21

## 22 **R98W is loss-of-function, unlike most other IRF4 variants**

23 We first characterized *IRF4* R98W production and function *in vitro*, in an  
24 overexpression system. We assessed the effect of the *IRF4* R98W mutation on *IRF4* levels by  
25 transiently expressing WT or mutant R98W in HEK293-T cells. *IRF4* R98A-C99A, which is



1 LOF for DNA-binding (49), was included as a negative control. In total cell extracts, mutant  
2 IRF4 proteins were more abundant than the WT protein, and had the expected molecular weight  
3 (MW) of 51 kDa, as shown by western blotting (Figure 2A). The R98 residue has been shown  
4 to be located in a nuclear localization signal, the complete disruption of which results in a loss  
5 of IRF4 retention in the nucleus (55). We therefore analyzed the subcellular distribution of IRF4  
6 WT and R98W proteins, in total, cytoplasmic and nuclear extracts from transiently transfected  
7 HEK293-T cells. The R98W mutant was more abundant than the WT protein in total cell and  
8 cytoplasmic extracts, but these proteins were similarly abundant in nuclear extracts (Figure 2B).  
9 We performed luciferase reporter assays to assess the ability of the mutant IRF4 protein to  
10 induce transcription from interferon-stimulated response element (*ISRE*) motif-containing  
11 promoters. Unlike the WT protein, both R98W and R98A-C99A failed to activate the (*ISRE*)<sub>3</sub>  
12 promoter (Figure 2C). We observed no dominant-negative effect of the IRF4 R98W protein  
13 (Figure S4). We assessed the ability of R98W to bind DNA, in an electrophoretic mobility shift  
14 assay (EMSA) (Figure 2, D, E). Signal specificity was assessed by analyzing both supershift  
15 with an IRF4-specific antibody and by competition with an unlabeled competitor probe. The  
16 R98W mutation abolished IRF4 binding to the *ISRE cis* element (Figure 2D), and binding of  
17 the IRF4-PU.1 complex to interferon composite elements (EICEs) containing both IRF4 and  
18 PU.1 recognition motifs (Figure 2E). The R98W allele of *IRF4* is therefore LOF for both DNA  
19 binding and the induction of transcription. Next, we tested 39 of the 156 other *IRF4* variants,  
20 including all variants found in GnomAD with a MAF above  $4.5 \times 10^{-5}$  (sixteen variants), or with  
21 a CADD score above 30 (ten variants), variants predicted to be LOF (five variants including  
22 two with a CADD score above 30; the splice variant could not be tested) and variants in the  
23 HGID database (three private variants and seven also present in GnomAD) (Figure S3, B, C).  
24 Thirty one variants were normally expressed (two of them with higher molecular weight), the  
25 five predicted LOF tested were not detectable (as expected since the antibody epitope is in the



1 IRF4 C terminus), as well as three missense (Figure S5, A, B). When tested for (*ISRE*)<sub>3</sub>  
2 promoter activation, only four variants from public databases (P208Q, R259W, R376C and  
3 R376H, MAF between  $4.1 \times 10^{-6}$  and  $7.2 \times 10^{-5}$ ) and one from the HGID database (G279-H280  
4 del, private to one family) were LOF (Figure S5, C, D). Our data show that the R98W *IRF4*  
5 allele is LOF, like only five very rare other non-synonymous *IRF4* variants out of the 39 variants  
6 tested.

7

### 8 **AD IRF4 deficiency phenotypes in heterozygous EBV-B cells**

9 We investigated the cellular phenotype of heterozygosity for the R98W allele in EBV-  
10 transformed B-cell lines (EBV-B cells) from patients. We performed reverse transcription-  
11 quantitative polymerase chain reaction (RT-qPCR) on EBV-B cells from P1, P3, two healthy  
12 heterozygous relatives (*IRF4* WT/R98W), four healthy *IRF4*-WT homozygous relatives, 25  
13 patients from our WD cohort (with unknown genetic etiologies) and seven healthy unrelated  
14 individuals (*IRF4* WT/WT). Cells from individuals heterozygous for the R98W mutation  
15 (patients and healthy carriers) had higher *IRF4* mRNA levels than those from WT homozygous  
16 relatives, unrelated WD cohort patients and EBV-B cells from unrelated healthy controls  
17 (Figure S6, A). We compared the relative abundances of WT and R98W *IRF4* mRNA in EBV-  
18 B cells from heterozygous carriers of the mutation, by performing TA-cloning experiments on  
19 P1, P3, one healthy heterozygous relative, one relative homozygous for WT *IRF4*, and two  
20 previously tested unrelated controls. In heterozygous carriers of the mutation (patients and  
21 healthy relatives) 48.1%-60% of the total *IRF4* mRNA carried the R98W mutation, whereas  
22 the rest was WT (Figure S6, B). We evaluated the levels and distribution of IRF4 protein by  
23 western blot in EBV-B cells from P1, P2, P3, one healthy heterozygous relative, three healthy  
24 homozygous WT relatives and five unrelated healthy individuals. As in transfected HEK293-T

1 cells, IRF4 protein levels were high in both total cell and cytoplasmic extracts of EBV-B cells  
2 from heterozygous carriers (Figure S7, A, B). By contrast, IRF4 protein levels in EBV-B cell  
3 nuclei were similar in heterozygous mutation carriers and controls (Figure S7, C). As IRF4 is a  
4 transcription factor, we then analyzed the steady-state transcriptome of EBV-B cells from three  
5 healthy homozygous WT relatives and three WT/R98W heterozygotes (P1, P3, VI.6). We  
6 identified 37 protein-coding genes as differentially expressed between subjects heterozygous  
7 for *IRF4* and those homozygous WT for *IRF4* (18 upregulated and 19 downregulated; data not  
8 shown). We identified no marked pathway enrichment based on these genes. EBV-B cells from  
9 *IRF4*-heterozygous individuals had a detectable phenotype, in terms of IRF4 production and  
10 function, consistent with AD IRF4 deficiency underlying WD.

11

## 12 **AD IRF4 deficiency phenotypes in heterozygous leukocytes**

13 We assessed IRF4 levels in myeloid and lymphoid cells from healthy controls (see  
14 Supplementary Results). IRF4 levels were highest in CD4<sup>+</sup> T cells, particularly after stimulation  
15 with CD2/CD3/CD28 beads (see Supplementary Results). We therefore assessed the IRF4  
16 protein expression profile in CD4<sup>+</sup> T cells from four controls, P1 and P3, with and without (non-  
17 stimulated, NS) stimulation with CD2/CD3/CD28-coated beads. The results were consistent  
18 with those for transfected HEK293-T and EBV-B cells, as IRF4 levels in total and cytoplasmic  
19 extracts were higher in CD4<sup>+</sup> T cells from P1 and P3, whereas IRF4 levels in the nucleus were  
20 similar in heterozygous mutation carriers and controls (Figure 3, A, B, C). We checked for  
21 transcriptomic differences associated with genotype and/or infection, by investigating the  
22 transcriptomes of peripheral mononuclear blood cells (PBMCs) from six *IRF4*-heterozygous  
23 individuals (three patients, P1-P3; and three healthy relatives, HET1-HET3) and six *IRF4* WT-  
24 homozygous individuals (four healthy relatives, WT1-WT4; and two unrelated controls, C1-

1 C2) with and without *in vitro* infection with Tw, or *Mycobacterium bovis*-Bacillus Calmette-  
2 Guerin (BCG) for 24 hours. We performed unsupervised hierarchical clustering of the  
3 differentially expressed (DE) transcripts (infected versus uninfected) to analyze the overall  
4 responsiveness of PBMCs from individual subjects to BCG and Tw infections *in vitro*.  
5 Heterozygous individuals clearly clustered separately from homozygous WT individuals  
6 (Figure 4, A), revealing a correlation between genotype and response to infection. In  
7 homozygous WT subjects, 402 transcripts from 193 unique genes were responsive to BCG  
8 infection, and 119 transcripts from 29 unique genes were responsive to Tw infection (Table S4  
9 A, B). Due to the small number of Tw-responsive transcripts linked to unique genes, we were  
10 unable to detect any pathway enrichment in this specific condition. However, we identified 24  
11 canonical pathways as enriched after the exposure of PBMCs to BCG. We ranked these  
12 pathways according to the difference in mean  $z$ -score between homozygous WT and  
13 heterozygous subjects (Figure 4, B). The top 10 pathways included the interferon signaling  
14 network, the Th1 pathway network, the HMGB1 signaling network, the p38 MAPK signaling  
15 network, the NF- $\kappa$ B signaling network, the dendritic cell maturation network and the network  
16 responsible for producing nitric oxide and reactive species. These pathways were highly ranked  
17 mostly due to *IFNG* and *STAT1*, which were strongly downregulated in *IRF4* heterozygotes,  
18 particularly in P1, P2 and P3, relative to WT homozygotes. *IRF4* is predicted to bind the  
19 promoter regions of 47% of the genes identified in the BCG study (91 of 193 genes), including  
20 those of *IFNG* and *STAT1*. Subjects heterozygous for *IRF4* also had lower levels of *LTA*  
21 expression and lower levels of *IL2RA* expression were observed specifically in patients (Table  
22 S4). These data suggest a general impairment of the T-cell response in subjects heterozygous  
23 for *IRF4* upon BCG infection *in vitro*. Moreover, the lower levels of *CD80* expression suggest  
24 a possible impairment of myeloid and/or antigen-presenting cell function upon BCG infection  
25 in patients but not in healthy heterozygous or homozygous WT subjects (Table S4). Peripheral

- 1 leukocytes from *IRF4*-heterozygous individuals therefore had a phenotype in terms of IRF4
- 2 production and function.
- 3

## 1           **Discussion**

2           WD was initially described as an inflammatory disease (1), but subsequently shown to  
3 be infectious (2-4). We provide evidence that WD is also a genetic disorder. We show here that,  
4 in a large multiplex kindred, heterozygosity for the private, loss-of-function R98W mutation of  
5 *IRF4* underlies an AD form of WD with incomplete penetrance. The causal relationship  
6 between *IRF4* genotype and WD was demonstrated as follows. First, the *IRF4* R98W mutation  
7 is the only non-synonymous rare variant segregating with WD in this kindred. Second, the  
8 mutation was demonstrated experimentally to be loss-of-function, unlike 34 of 39 other non-  
9 synonymous *IRF4* variants in the general population, including all eight variants with a MAF  
10 greater than 0.0001. Only six of the 156 identified *IRF4* variants were predicted to be LOF, five  
11 of which were experimentally tested and shown not to be LOF. Moreover, *IRF4* has evolved  
12 under purifying selection, suggesting that deleterious heterozygous variants of this gene entail  
13 fitness costs (56-58). Third, EBV-B cell lines heterozygous for *IRF4* R98W have a distinctive  
14 phenotype, particularly for IRF4 expression. This mutation also has a strong functional impact  
15 on the gene expression of *IRF4* R98W-heterozygous PBMCs stimulated with BCG or Tw.  
16 These findings unequivocally show that heterozygosity for the R98W allele of *IRF4* is the  
17 genetic etiology of WD in this kindred. Other patients may also develop WD due to inborn  
18 errors of immunity. WD is a late-onset infectious disease. This observation therefore extends  
19 our model, in which life-threatening infectious diseases striking otherwise healthy individuals  
20 during primary infection can result from single-gene inborn errors of immunity (35, 36).

21           In this kindred with AD *IRF4* deficiency, haploinsufficiency was identified as the key  
22 mechanism, although *IRF4* protein levels in the cytoplasmic compartment were higher in  
23 patients with the mutation than in wild-type homozygotes. The protein was not more abundant  
24 in the nucleus, where *IRF4* exerts its effects on transcription. Moreover, not only is *IRF4* subject  
25 to purifying selection, but the R98W mutation is itself LOF, with no detectable dominant-

1 negative effect at cell level. Haploinsufficiency is an increasingly recognized mechanism  
2 underlying AD inborn errors of immunity (58, 59). It is commonly due to loss-of-expression  
3 alleles, contrasting with the negative dominance typically exerted by expressed proteins, but  
4 many mutations are known to cause haploinsufficiency without actually preventing protein  
5 production (58-60). Incomplete penetrance is common in conditions resulting from  
6 haploinsufficiency. In this kindred, incomplete penetrance may result from a lack of Tw  
7 infection, or a lack of WD development in infected individuals. All five chronic carriers of Tw  
8 were heterozygous, suggesting that AD *IRF4* deficiency also favors the development of chronic  
9 Tw carriage, also with incomplete penetrance. The five asymptomatic carriers were 24 to 82  
10 years old, whereas the four patients were 69 to 92 years old. All were heterozygous. The impact  
11 of *IRF4* R98W may therefore increase with age, initially facilitating chronic carriage in Tw-  
12 infected individuals, and subsequently predisposing chronic carriers to WD. Future studies will  
13 attempt to define the cellular basis of WD in individuals with *IRF4* mutations. The apparently  
14 normal development and function of all myeloid and lymphoid blood subsets studied in patients  
15 (see Supplementary Results), and the selective predisposition of these individuals to WD  
16 suggest that the disease mechanism is subtle and specifically affects protective immunity to Tw,  
17 and that it may act in the gastrointestinal tract.

18

## 1 **Materials and Methods**

2 Informed consent was obtained from all family members, and the study was approved by  
3 the national ethics committee.

4

### 5 **Genome-wide analysis**

6 Genome-wide linkage analysis was performed by combining genome-wide array and  
7 whole-exome sequencing (WES) data (39). In total, nine family members were genotyped with  
8 the Genome-Wide Human SNP Array 6.0. Genotype calling was achieved with the Affymetrix

9 Power Tools Software Package

10 ([http://www.affymetrix.com/estore/partners\\_programs/programs/developer/tools/powertools.a](http://www.affymetrix.com/estore/partners_programs/programs/developer/tools/powertools.a)

11 [ffx](#)). SNPs were selected with population-based filters (61), resulting in the use of 905,420

12 SNPs for linkage analysis. WES was performed as described in the corresponding section, in

13 four family members, P1, P2, P3 and P4. In total, 64,348 WES variants were retained after

14 application of the following filtering criteria: genotype quality (GQ) > 40, minor read ratio

15 (MRR) > 0.3, individual depth (DP) > 20x, retaining only diallelic variants with an existing RS

16 number and a call rate of 100%. Parametric multipoint linkage analysis was performed with the

17 Merlin program (62), using the combined set of 960,267 variants. We assumed an AD mode of

18 inheritance with a frequency of the deleterious allele of  $10^{-5}$  and a penetrance varying with age

19 (0.8 above the age of 65 years, and 0.02 below this threshold). Data for the family and for

20 Europeans from the 1000G project were used to estimate allele frequencies and to define

21 linkage clusters, with an  $r^2$  threshold of 0.4.

22 The method used for WES have been described elsewhere (63, 64). Briefly, genomic

23 DNA extracted from the patients' blood cells was sheared with a Covaris S2 Ultrasonicator

24 (Covaris). An adapter-ligated library was prepared with the Paired-End Sample Prep kit V1



1 (Illumina). Exome capture was performed with the SureSelect Human All Exon kit (71 Mb  
2 version - Agilent Technologies). Paired-end sequencing was performed on an Illumina Genome  
3 Analyzer IIx (Illumina), generating 72- or 100-base reads. We used a BWA-MEM aligner (65)  
4 to align the sequences with the human genome reference sequence (hg19 build). Downstream  
5 processing was carried out with the Genome analysis toolkit (GATK) (66) SAMtools (67), and  
6 Picard Tools (<http://picard.sourceforge.net>). Substitution calls were made with a GATK  
7 UnifiedGenotyper, whereas indel calls were made with a SomaticIndelDetectorV2. All calls  
8 with a read coverage <2x and a Phredscaled SNP quality <20 were filtered out. Single-  
9 nucleotide variants (SNV) were filtered on the basis of dbSNP135  
10 (<http://www.ncbi.nlm.nih.gov/SNP/>) and 1000 Genomes  
11 (<http://browser.1000genomes.org/index.html>) data. All variants were annotated with  
12 ANNOVAR (68). All *IRF4* mutations identified by WES were confirmed by Sanger  
13 sequencing.

14

## 15 **Tw detection**

16 PCR and serological tests for Tw were performed as previously described (29).

17

## 18 **Cell culture and subpopulation separation**

19 PBMCs were isolated by Ficoll-Hypaque density centrifugation (GE Healthcare) from  
20 cytopheresis or whole-blood samples obtained from healthy volunteers and patients,  
21 respectively. PBMCs and EBV-B cells were cultured in RPMI medium supplemented with 10%  
22 FBS, whereas HEK293-T cells were cultured in DMEM medium supplemented with 10%

1 FBS. Subsets were separated by MACS, using magnetic beads conjugated with the appropriate  
2 antibody (Miltenyi Biotec) according to the manufacturer's protocol.

3

#### 4 **Site-directed mutagenesis and transient transfection**

5 The full-length cDNA of *IRF4* and *PU.1* was inserted into the pcDNA<sup>TM</sup> 3.1D/V5-His-  
6 TOPO<sup>®</sup> vector with the directional TOPO expression kit (Thermo Fisher Scientific). Constructs  
7 carrying mutant alleles were generated from this plasmid by mutagenesis with a site-directed  
8 mutagenesis kit (QuikChangeII XL; Agilent Technologies), according to the manufacturer's  
9 instructions. HEK293 T cells were transiently transfected with the various constructs, using the  
10 Lipofectamine LTX kit (Thermo Fisher Scientific) in accordance with the manufacturer's  
11 instructions.

12

#### 13 **Cell lysis and western blotting**

14 Total protein extracts were prepared by mixing cells with lysis buffer (50 mM Tris-HCl  
15 pH 7.4, 150 mM NaCl, 0.5% Triton X-100, and 2 mM EDTA supplemented with protease  
16 inhibitors (Complete, Roche) and phosphatase inhibitor cocktail (PhoStop, Roche), 0.1 mM  
17 dithiothreitol DTT (Life Technologies, California, USA), 10 µg/ml pepstatin A (Sigma,  
18 #P4265), 10 µg/ml leupeptin (Sigma, #L2884), 10 µg/ml antipain dihydrochloride (Sigma,  
19 #A6191) and incubating for 40 minutes on ice. A two-step extraction was performed to separate  
20 the cytoplasmic and nuclear content of the cells; cells were first mixed with a membrane lysis  
21 buffer (10 mM Hepes pH 7.9, 10 mM KCl, 0.1 mM EDTA, 0.1 mM EGTA, 0.05 % NP40, 25  
22 mM NaF supplemented with 1 mM PMSF, 1 mM DTT, 10 µg/ml leupeptin, 10 µg/ml aprotinin)  
23 and incubated for 30 minutes on ice. The lysate was centrifuged at 10,000 x g. The supernatant,  
24 corresponding to the cytoplasm-enriched fraction, was collected and the nuclear pellet was

1 mixed with nuclear lysis buffer (20 mM Hepes pH 7.9, 0.4 M NaCl, 1, mM EDTA, 1, mM  
2 EGTA, 25% glycerol supplemented with 1 mM PMSF, 1 mM DTT, 10 µg/ml leupeptin, 10  
3 µg/ml aprotinin). Equal amounts of protein, according to a Bradford protein assay (BioRad,  
4 Hercules, California, USA), were resolved by SDS-PAGE in a Criterion™ TGX™ 10% precast  
5 gel (Biorad) and transferred to a low-fluorescence PVDF membrane. Membranes were probed  
6 with unconjugated antibody: anti-IRF4 (Santa Cruz, M-17) antibody was used at a dilution of  
7 1:1000 and antibodies against GAPDH (Santa Cruz, FL-335), topoisomerase I (Santa Cruz, C-  
8 21), and lamin A/C (Santa Cruz, H-110) were used as loading controls. The appropriate HRP-  
9 conjugated or infrared dye (IRDye)-conjugated secondary antibodies were incubated with the  
10 membrane for the detection of antibody binding by the ChemiDoc MP (Biorad) or Licor  
11 Odyssey CLx system (Li-Cor, Lincoln, Nebraska, USA) respectively.

12

### 13 EMSA

14 Double-stranded unlabeled oligonucleotides (cold probes) were generated by annealing  
15 in TE buffer (pH 7.9) supplemented with 33.3 mM NaCl and 0.67 mM MgCl<sub>2</sub>. The annealing  
16 conditions were 100°C for 5 minutes, followed by cooling overnight at room temperature.  
17 After centrifugation at 3,000 x g centrifugation at 4°C for 30 minutes, the pellet was suspended  
18 in water. We labeled 0.1 µg of cold probe in Klenow buffer supplemented with 9.99 mM dNTP  
19 without ATP, 10 U Klenow fragment (NEB) and 50 µCi d-ATP-<sup>32</sup>P, at 37°C for 60 minutes.  
20 Labeled probes were purified on Illustra MicroSpin G-25 Columns (GE Healthcare Life  
21 Sciences) according to the manufacturer's protocol. We incubated 10 µg of nuclear protein  
22 lysate for 30 minutes on ice with <sup>32</sup>P-labeled (α-dATP) *ISRE* probe (5' – gat cGG GAA AGG  
23 GAA ACC GAA ACT GAA-3') designed on the basis of the *ISG15* promoter or λB probe (5'-  
24 gat cGC TCT TTA TTT TCC TTC ACT TTG GTT AC-3') described by Brass et al. in 1999

1 (49). For supershift assays, nuclear protein lysates were incubated for 30 minutes on ice with 2  
2  $\mu\text{g}$  of anti-IRF4 (Santa Cruz, M-17) antibody or anti-goat Ig (Santa Cruz) antibody.  
3 Protein/oligonucleotide mixtures were then subjected to electrophoresis in 12.5%  
4 acrylamide/bis-acrylamide 37.5:1 gels in 0.5% TBE migration buffer for 80 minutes at 200 mA.  
5 Gels were dried on Whatman paper at 80°C for 30 minutes and placed in a phosphor-screen  
6 cassette for five days. Radioactivity levels were analyzed with the Fluorescent Image Analyzer  
7 FLA-3000 system (Fujifilm). For oligonucleotide probes tagged at the 5' end with a fluorescent  
8 IRD700 tag (Metabion), fluorescence was measured with the Licor Odyssey CLx system (Li-  
9 Cor, Lincoln, Nebraska, USA) immediately after electrophoresis of the protein/oligonucleotide  
10 mixture as described above.

11

## 12 **Luciferase reporter assays**

13 The  $(ISRE)_3$  reporter plasmid, which contains three repeats of the *ISRE* sequence  
14 separated by spacers was kindly provided by Prof. Aviva Azriel (Department of Biotechnology  
15 and Food Engineering, Technion-Israel Institute of Technology). HEK293 T cells were  
16 transiently transfected with the  $(ISRE)_3$  reporter plasmid (100 ng/well for a 96-well plate), the  
17 pRL-SV40 vector (40 ng/well) and a *IRF4* WT or mutant pcDNA<sup>TM</sup> 3.1D/V5-His-TOPO<sup>®</sup>  
18 plasmid (25 ng/well, made up to 50 ng with empty plasmid), with the Lipofectamine LTX kit  
19 (Thermo Fisher Scientific), according to the manufacturer's instructions. Cells were used for  
20 luciferase assays 24 h after transfection, with the Dual-Luciferase<sup>®</sup> 1000 assay system kit  
21 (Promega), according to the manufacturer's protocol. Signal intensity was determined with a  
22 Victor<sup>TM</sup> X4 plate reader (Perkin Elmer). Experiments were performed in triplicate and  $(ISRE)_3$   
23 reporter activity is expressed as fold induction relative to cells transfected with the empty  
24 vector. Negative dominance was assessed by performing the same protocol with the following  
25 modifications:  $(ISRE)_3$  reporter plasmid (100 ng/well for a 96-well plate), pRL-SV40 vector

1 (40 ng/well) WT and mutant plasmids were used to cotransfect cells, with a constant amount of  
2 WT plasmid (25 ng/well) but various amounts of mutant plasmid (25 ng/well alone made up to  
3 50 ng with empty plasmid or 25 ng/well, 12.5 ng/well, or 6.25 ng/well made up to 25 ng with  
4 empty plasmid) for a total amount of 190 ng/well.

5

## 6 **Microarrays**

7 For the microarray analysis of PBMCs, cells from six *IRF4*-heterozygous individuals  
8 (three patients, P1-P3; and three healthy relatives, HET1-HET3) and six *IRF4* WT-homozygous  
9 individuals (four healthy relatives, WT1-WT4; and two unrelated controls, C1-C2) were  
10 dispensed into a 96-well plate at a density of 200,000 cells/well and were infected *in vitro* with  
11 live Tw at a multiplicity of infection (MOI) of 1, or with live BCG (*M. bovis*-BCG, Pasteur  
12 substrain) at a MOI of 20, or were left uninfected (mock). Two wells per condition were  
13 combined 24 h post-infection for total RNA isolation with the ZR RNA Microprep™ kit (Zymo  
14 Research). For the microarray on EBV-B cells, we used 400,000 cells from three *IRF4*-  
15 heterozygous mutation carriers and three WT individuals from the kindred for total RNA  
16 isolation with the ZR RNA Microprep™ kit (Zymo Research). Microarray experiments on both  
17 PBMCs and EBV-B cells were performed with the Affymetrix GeneChip Human  
18 Transcriptome Array 2.0. Raw expression data were normalized by the robust multi-array  
19 average expression (RMA) method implemented in the affy R package (69, 70). Normalized  
20 expression data were processed as follows, to select transcripts substantially affected by *in vitro*  
21 infection of PBMC samples obtained from the subjects described above with BCG or with Tw.  
22 First, fold-changes in expression between mock-infected and BCG-infected or Tw-infected  
23 conditions were calculated for each individual separately. For each set of conditions, transcripts  
24 were further filtered based on a minimal 1.5-fold change (FC) in expression (up- or  
25 downregulation), with a minimum absolute difference in expression of more than 150 relative

1 to unstimulated samples. In a final filtering stage, transcripts satisfying the previous filters in  
2 four of the six homozygous individuals with a normal genotype (WT and HET) for each *in vitro*  
3 infection condition were retained for downstream analysis and production of the corresponding  
4 figures. We analyzed the relative response, by counting the number of probes for which  
5 differences were observed between heterozygous individuals and subjects with a WT  
6 homozygous genotype. We calculated the number of probes affected by stimulation in samples  
7 from control subjects, for the same stimulus. The overall transcriptional responsiveness of  
8 individual subjects to both Tw and BCG is depicted as a heatmap, and individual subjects were  
9 grouped by unsupervised hierarchical clustering. Responsive transcripts were further analyzed  
10 with Ingenuity Pathway Analysis (IPA) Software, Version 28820210 (QIAGEN) (71) for  
11 functional interpretation. In brief, the FC values for each individual and treatment were used as  
12 input data for the identification of canonical pathway enrichment ( $z$ -score cut-off was set at  
13 0.1). The activation  $z$ -score values calculated for the identified pathways were exported from  
14 IPA and used to calculate mean values and differences between WT homozygote and  
15 heterozygotes and for graphical representation, with Microsoft Excel and GraphPad Prism  
16 Version 7.0, respectively. The direction of the difference was not considered further. Negative  
17 mean difference values were converted into positive values before the ranking of the canonical  
18 pathways according to the difference between the genotypes. The microarray data used in this  
19 study have been deposited in the NCBI Gene Expression Omnibus (GEO), under accession  
20 number GSE102862.

21

## 22 ***IRF4* qPCR**

23 Total RNA was prepared from the EBV-B cells of patients heterozygous for *IRF4*  
24 mutations and WT family members or unrelated individuals (healthy control and a patient with  
25 Tw carriage). RNA was prepared from 500,000 cells with the RNeasy Micro kit, according to

1 the manufacturer's instructions (Qiagen). A mixture of random octamers and oligo dT-16 was  
2 used with the MuLV reverse transcriptase (High-Capacity RNA-to-cDNA™ kit, Thermo Fisher  
3 Scientific), to generate cDNA. Quantitative real-time PCR was performed with the TaqMan®  
4 Universal PCR Master Mix (Roche), the *IRF4*-specific primer (Hs01056533\_m1, Thermo  
5 Fisher Scientific) and the endogenous human  $\beta$ -glucuronidase (*GUSB*) as a control (4326320E,  
6 Thermo Fisher Scientific). Data were analyzed by the  $\Delta\Delta$ Ct method, with normalization against  
7 *GUSB*.

8

### 9 ***IRF4* TA-cloning**

10 The full-length cDNA generated from the EBV-B cells of heterozygous and WT-  
11 homozygous individuals was used for the PCR amplification of exon 3 of *IRF4*. The products  
12 obtained were cloned with the TOPO TA cloning kit (pCR2.1®-TOPO® TA vector, Thermo  
13 Fisher Scientific), according to the manufacturer's instructions. They were then used to  
14 transform chemically competent bacteria, and 100 clones per individual were Sanger-sequenced  
15 with M13 primers (forward and reverse).

16

### 17 ***Ex vivo* naïve and effector/memory CD4<sup>+</sup> T-cell stimulation**

18 CD4<sup>+</sup> T cells were isolated as previously described (72). Briefly, cells were labeled with  
19 anti-CD4, anti-CD45RA, and anti-CCR7 antibodies, and naïve (defined as CD45RA<sup>+</sup> CCR7<sup>+</sup>  
20 CD4<sup>+</sup>) T cells or effector/memory T cells (defined as CD45RA<sup>-</sup>CCR7<sup>±</sup> CD4<sup>+</sup>) were isolated (>  
21 98% purity) with a FACS Aria cell sorter (BD Biosciences). Purified naïve or effector/memory  
22 CD4<sup>+</sup> T cells were cultured with T-cell activation and expansion beads (anti-CD2/CD3/CD28;  
23 Miltenyi Biotec) for 5 days; culture supernatants were then used to assess the secretion of IL-



1 2, IL-4, IL-5, IL-6, IL-9, IL-10, IL-13, IL-17A, IL-17F, IFN $\gamma$  and TNF $\alpha$  with a cytometric bead  
2 array (BD) and the secretion of IL-22, by ELISA.

3

#### 4 ***In vitro* differentiation of naïve CD4<sup>+</sup> T cells**

5 Naïve CD4<sup>+</sup> T cells (CD45RA<sup>+</sup>CCR7<sup>+</sup>) were isolated (> 98% purity) from healthy  
6 controls or patients, with a FACS Aria sorter (BD Biosciences). They were cultured under  
7 polarizing conditions, as previously described (72). Briefly, cells were cultured with T-cell  
8 activation and expansion beads (anti-CD2/CD3/CD28; Miltenyi Biotec) alone or under Th1  
9 (IL-12 [20 ng/ml; R&D Systems]) or Th17 (TGF $\beta$ , IL-1 $\beta$  [20 ng/ml; Peprotech], IL-6 [50  
10 ng/ml; PeproTech], IL-21 [50 ng/ml; PeproTech], IL-23 [20 ng/ml; eBioscience], anti-IL-4 [5  
11  $\mu$ g/ml], and anti-IFN- $\gamma$  [5  $\mu$ g/ml; eBioscience]) polarizing conditions. After five days, culture  
12 supernatants were used to assess the secretion of the cytokines indicated, by ELISA (IL-22), or  
13 with a cytometric bead array (all other cytokines).

14

## 1           **Acknowledgments**

2           We thank the patients and their families for participating in the study. We thank Yelena  
3 Nemirovskaya, Tatiana Kochetkov, Lahouari Amar, Cécile Patissier, Céline Desvallées,  
4 Dominick Papandrea, Mark Woollett, and Amy Gall for technical and secretarial assistance and  
5 all members of the Laboratory of Human Genetics of Infectious Diseases for helpful  
6 discussions. We acknowledge the use of the biological resources of the Imagine Institute DNA  
7 biobank (BB-33-00065). A.G. was supported by ANR-IFNPHOX (ANR-13-ISV3-0001-01)  
8 and Imagine Institute. The Laboratory of Human Genetics of Infectious Diseases is supported  
9 in part by grants from the St. Giles Foundation, The Rockefeller University, Institut National  
10 de la Santé et de la Recherche Médicale (INSERM), Paris Descartes University, and the  
11 European Research Council (ERC), the Integrative Biology of Emerging Infectious Diseases  
12 Laboratory of Excellence (ANR-10-LABX-62-IBEID) and the French National Research  
13 Agency (ANR) under the “Investments for the future” program (grant number ANR-10-IAHU-  
14 01), ANR-IFNPHOX (ANR-13-ISV3-0001-01, to J.B.), ANR-GENMSMD (ANR-16-CE17-  
15 0005-01, to J.B.). Research in the Quintana-Murci laboratory was supported by the Pasteur  
16 Institute, the Centre National de la Recherche Scientifique (CNRS), the French Government’s  
17 Investissement d’Avenir program, (ANR-10-LABX-62-IBEID), IEIHSEER (ANR-14-CE14-  
18 0008-02) and TBPATHTGEN (ANR-14-CE14-0007-02), and the European Union’s Seventh  
19 Framework Program (FP/2007–2013)/ERC Grant Agreement No. 281297. S.G.T. and C.S.M.  
20 are supported by grants and fellowship awarded by the National Health and Medical Research  
21 Council of Australia (1113904, 1042925) and the Office of Health and Medical Research of the  
22 New South Wales State Government. T.N. and L.W. are supported by Australian Postgraduate  
23 Research Awards from the University of NSW.

24

## 1           **Supplementary Results**

### 2           **Case report**

3           All members of the multiplex kindred studied, the pedigree of which is shown in Figure  
4 1, live in France and are of French descent.

5           Patient 1 (P1, proband) was born in 1948 and presented arthritis of the right knee in  
6 2011, after recurrent episodes of arthritis of this joint associated with effusion since 1980.  
7 *Tropheryma whippelii* (Tw) was detected in synovial fluid by PCR and culture in 2011, but was  
8 not detected by PCR in saliva, feces, and small-bowel biopsy specimens. Physical examination  
9 revealed a large effusion of the right knee, limiting mobility. The fluid aspirated from this joint  
10 contained 4,000 erythrocytes/mm<sup>3</sup> and 8,800 leukocytes/mm<sup>3</sup>, but no crystals or evidence of  
11 microbes. Synovial hypertrophy of the right knee and a narrowing of the right internal femoro-  
12 tibial joint were detected on MRI. X ray showed an extension of the right femoro-tibial joint  
13 and erosion of the posterior part of the femoro-tibial joint. However, erythrocyte sedimentation  
14 rate (ESR) (3 mm/h) and C-reactive protein (CRP) (1.8 mg/l) determinations gave negative  
15 results. P1 received methotrexate (15 mg/week) for four months, without remission. Antibiotic  
16 treatment with doxycycline (200 mg/day) was then initiated immediately. The arthralgia  
17 resolved, but right knee effusion persisted. Hydroxychloroquine was therefore added to the  
18 treatment regimen. At last follow-up, in 2016, the patient was well and PCR for Tw was  
19 negative for saliva and feces samples.

20           P2, a second cousin of P1, was born in 1941 and was diagnosed with classical WD and  
21 digestive problems in 1978, based on positive periodic acid–Schiff (PAS) staining of a small  
22 intestine biopsy specimen. She was treated with sulfamethoxazole/trimethoprim. At last follow-  
23 up, in 2016, Tw PCR was positive for the saliva and feces.

24           P3, the father of P1, was born in 1925 and was diagnosed with classical WD in 1987 on  
25 the basis of positive PAS staining of a small intestine biopsy specimen. Clinical manifestations

1 included diarrhea, abdominal pain and weight loss. P3 displayed no extraintestinal  
2 manifestations. He was successfully treated with sulfamethoxazole/trimethoprim, with  
3 complete clinical and bacteriological remission.

4 P4, the brother of P2, was born in 1947 and sought medical advice in 2015 for arthralgia  
5 affecting the knees and right ulna-carpal joints. The other joints were unaffected. A culture of  
6 the joint fluid was negative for bacteria, but Tw was not sought. Tw was not detected in the  
7 saliva and feces by PCR or culture, but serological tests for Tw were positive. P4 had no  
8 rheumatoid factor, anti-cyclic citrullinated peptide antibodies (anti-CCP), or anti-nuclear  
9 antibodies. The fluid aspirated from the right knee contained 4,800 erythrocytes/mm<sup>3</sup> and  
10 10,900 leukocytes/mm<sup>3</sup> (91% neutrophils and 9% lymphocytes) without crystals. Synovial fluid  
11 culture was negative for bacteria, but Tw was not sought. Blood tests revealed an ESR of 30  
12 mm/h and a CRP concentration of 50 mg/l, with no rheumatoid factor, anti-cyclic citrullinated  
13 peptide antibodies (anti-CCP) or anti-nuclear antibodies. An X ray revealed a narrowing of the  
14 joint space in the knees and vertebral hyperostosis were visible. The joints of the hands were  
15 unaffected. The patient was treated with anti-inflammatory drugs, without success. Treatment  
16 with methotrexate and steroids was introduced, followed by antibiotics, the effect of which is  
17 currently being evaluated.

18 Saliva and/or feces samples from 18 other members of the family were checked for the  
19 presence of Tw, by a PCR specifically targeting *T. whipplei*, as previously described (Figure 1,  
20 A) (73). Five individuals were found to be chronic carriers (mean age: 55 years) and 13 were  
21 not (mean age: 38 years). Testing was not possible for nine other relatives. The overall  
22 distribution of WD in this kindred was suggestive of an AD trait with incomplete penetrance.

23

## 1           **Production and function of IRF4 in the patients' peripheral leukocytes**

2           We investigated IRF4 levels by western blotting on total cell lysates from peripheral  
3 blood mononuclear cells (PBMCs) and their subpopulations isolated from six healthy controls.  
4 We showed that IRF4 was produced in large amounts in total B lymphocytes (CD19<sup>+</sup>), but also  
5 naïve and memory B lymphocytes (CD19<sup>+</sup>CD27<sup>-</sup> and CD19<sup>+</sup>CD27<sup>+</sup>, respectively; Figure S8).  
6 IRF4 was less strongly expressed in CD3<sup>+</sup> T lymphocytes and was not detectable in CD14<sup>+</sup>  
7 monocytes or CD56<sup>+</sup> natural killer (NK) cells. IRF4 levels were low in naïve CD3<sup>+</sup> T cells and  
8 CD4<sup>+</sup> T cells, but not detectable in naïve CD8<sup>+</sup> T cells in the basal state, relative to controls  
9 cells (western blot, data not shown). We showed, in CD3<sup>+</sup> T cells and CD4<sup>+</sup> T cells, that phorbol  
10 myristate acetate (PMA)-ionomycin stimulation induced the production of even larger amounts  
11 of IRF4 expression following activation with CD2/CD3/CD28-coated beads (data not shown).  
12 We therefore assessed the pattern of IRF4 protein production in CD4<sup>+</sup> T cells from four  
13 controls, P1 and P3, either non-stimulated (NS) or stimulated with CD2/CD3/CD28-coated  
14 beads. Our results are consistent with our findings for HEK293 T cells, as IRF4 production by  
15 P1 and P3 CD4<sup>+</sup> T cells was stronger than that by CD4<sup>+</sup> T cells from unrelated controls, in total  
16 cell lysates (4.5 times higher for P1 and 2.1 times higher for P3 in NS conditions; 1.9 times  
17 higher for P1 and 1.3 times higher for P3 under stimulation), in the cytoplasmic compartment  
18 (3 times higher for P1 and 3.7 times higher for P3 in NS conditions; 7.7 times higher for P1 and  
19 2.3 times higher for P3 under stimulation) and in the nuclear compartment in NS conditions (2  
20 times higher for P1 and 3 times higher for P3) but not under stimulation (2 times higher for P1  
21 and 0.6 times higher for P3) (Figure 3, A, B, C). Analyses of the overall pattern of IRF4  
22 expression in the cells of controls and patients showed that the patients' CD4<sup>+</sup> T lymphocytes  
23 had higher total IRF4 levels and that a higher proportion of IRF4 was located in the cytoplasm  
24 than in controls, as observed for EBV-B cells and with the overexpression system.

1 We characterized the transcriptomic differences linked to genotype and/or to infection,  
2 by performing microarray studies on PBMCs (at early time points or in the absence of  
3 stimulation for 24 h (NS)) from six *IRF4*-heterozygous individuals (three patients, P1-P3; and  
4 three healthy relatives, HET1-HET3) and six individuals homozygous for the WT *IRF4* allele  
5 (four healthy relatives, WT1-WT4; and two unrelated controls, C1-C2). A comparison of NS  
6 samples from the *IRF4*-heterozygous and *IRF4* WT-homozygous groups showed that  
7 differentially regulated transcripts could be detected only at an early time point (49 genes  
8 upregulated and 16 downregulated in the heterozygous group relative to the WT homozygotes),  
9 but not after 24 h. It was not, therefore, possible to distinguish genes differentially regulated  
10 due to the *IRF4* mutation from those differentially regulated as a result of a systemic immune  
11 response in the patients.

12

### 13 **Expression and function of IRF4 in the patients' myeloid cells**

14 An analysis of the three main subsets of DCs present in human blood —CD303<sup>+</sup> pDCs  
15 (CD123<sup>+</sup> CD303<sup>+</sup> HLA-DR<sup>+</sup> Lin<sup>-</sup> CD14<sup>-</sup> CD16<sup>-</sup>), CD1c<sup>+</sup> cDCs (CD1c<sup>+</sup> CD11c<sup>+</sup> HLA-DR<sup>+</sup> Lin<sup>-</sup>  
16 CD14<sup>-</sup> CD16<sup>-</sup>) and CD141<sup>+</sup> cDCs (CD141<sup>+</sup> CD11c<sup>+</sup> HLA-DR<sup>+</sup> Lin<sup>-</sup> CD14<sup>-</sup> CD16<sup>-</sup>) — showed  
17 that the frequencies of these subsets in P1 were similar to those in controls (Figure S9). We  
18 assessed IRF4 expression levels and the effect of IRF4 deficiency in myeloid cells, by first  
19 studying monocyte-derived dendritic cells (MDDCs) from controls, in which IRF4 was  
20 produced after stimulation with LPS but not after stimulation with IFN- $\gamma$ . IRF4 was not  
21 produced by immature MDDC (data not shown). We also generated monocyte-derived  
22 macrophages (MDMs) for controls and patients, using different conditions of differentiation  
23 and activation to obtain M1-like and M2-like MDMs. We found that IRF4 was present in similar  
24 amounts in MDMs from patients and controls, regardless of the differentiation or activation  
25 conditions used (Figure S10, A and B). FACS analysis of MDMs with common and specific

1 markers (for M1-like and M2-like MDMs) showed that CD11b, CD86, CD206, CD209 and  
2 HLA-DR expression was similar for MDMs from patients and MDMs from controls (Figure  
3 S10, C and D). Thus, all the myeloid subsets studied developed and functioned normally in the  
4 patient, suggesting a subtle disease mechanism.

5

## 6 **Lymphoid immunological phenotype**

7 We then assessed the potential impact of heterozygosity for the R98W mutation of *IRF4*  
8 on the development and function of lymphoid subsets. In mice, *Irf4* plays a major role in the  
9 generation, differentiation and functions of various immune cells, including T and B  
10 lymphocytes (74, 75). We analyzed peripheral leukocytes from the three patients (P1, P2, P3)  
11 and from the P1's healthy dizygotic twin sister (WT). All subjects had normal numbers and  
12 percentages of T, B, and NK cells for age (table S5). We also performed deeper B-cell  
13 immunophenotyping by flow cytometry. The frequency of memory B cells within the total B-  
14 cell population was normal, as was the frequency of class-switched B cells in the memory  
15 compartment in cells from the patients (P1, P2 and P3), as shown by comparisons with healthy  
16 controls (Figure S11, A). We assessed *ex vivo* cytokine production by differentiated memory  
17 CD4<sup>+</sup> Th cells. Cells from the patients (P2 and P3) produced more IL-9 and less IL-17A and  
18 IL-17F than cells from controls (Figure. S11, B). We found no significant difference in the  
19 production of IL-2, IL-4, IL-5, IL-10, IL-13, IL-22, IFN- $\gamma$  and tumor necrosis factor-alpha  
20 (TNF- $\alpha$ ) between patients and controls (Figure S11, B). Analyses of CD4<sup>+</sup> T-cell differentiation  
21 *in vitro* showed that, contrary to the *ex vivo* data obtained for memory CD4<sup>+</sup> T cells, naïve CD4<sup>+</sup>  
22 T cells from the patients were able to produce relatively normal amounts of IL-17-A/F (Figure  
23 S11, C). The *in vitro* production of IFN- $\gamma$ , IL-10 and IL-21 by naïve CD4<sup>+</sup> T cells from patients  
24 was also unimpaired (Figure S11, C). Furthermore, studies of the *in vitro* function of naïve and  
25 total memory B cells upon costimulation with CD40 ligand (CD40L) and IL-21 showed that



1 cells from patients (P2 and P3) produced similar amounts of IgA, IgG and IgM to cells from  
2 healthy controls (data not shown). Thus, overall, in the experimental conditions tested, the *IRF4*  
3 R98W mutation has no global effect on the development or function of adaptive immune system  
4 lymphocytes, suggesting that haploinsufficiency for IRF4 does not underlie WD through  
5 adaptive immune responses.

6

### 7 **Additional information concerning the mouse model**

8 *Irf4*-deficient homozygous mice have lymphoid defects relating to differentiation (Th1,  
9 B cells), proliferation (T and B cells), Ig levels (IgG and IgM) and activity (abolition of IL-4  
10 and IFN- $\gamma$  production by CD4<sup>+</sup> T cells after infection with *Leishmania major*). They also  
11 display splenomegaly, adenomegaly, lower counts of plasmacytoid dendritic cells (pDCs) in  
12 the spleen and thymus, of the abolition of plasma cells in the spleen and abnormal class-switch  
13 recombination. Moreover, homozygous mice have no germinal center in the spleen and lymph  
14 nodes and are more susceptible to *Leishmania* and lymphocytic choriomeningitis virus (42-47).  
15 Mice heterozygous for an *Irf4*-null mutation have not been studied.

16

## 1           **References**

- 2    1.       Whipple GH. A hitherto undescribed disease characterized anatomically by deposits of fat and  
3 fattyacids in the intestinal and mesentericlymphatic tissues. *Bull Johns Hopkins Hosp.* 1907;18(5):382.
- 4    2.       Yardley JH, Hendrix TR. Combined electron and light microscopy in Whipple's disease.  
5 Demonstration of "bacillary bodies" in the intestine. *Bull Johns Hopkins Hosp.* 1961;109:80-98. Epub  
6 1961/08/01.
- 7    3.       Relman DA, Schmidt TM, MacDermott RP, Falkow S. Identification of the uncultured bacillus of  
8 Whipple's disease. *N Engl J Med.* 1992;327(5):293-301. Epub 1992/07/30.
- 9    4.       Raoult D, Birg ML, La Scola B, Fournier PE, Enea M, Lepidi H, et al. Cultivation of the bacillus of  
10 Whipple's disease. *N Engl J Med.* 2000;342(9):620-5. Epub 2000/03/04.
- 11   5.       Braubach P, Lippmann T, Raoult D, Lagier JC, Anagnostopoulos I, Zender S, et al. Fluorescence  
12 In Situ Hybridization for Diagnosis of Whipple's Disease in Formalin-Fixed Paraffin-Embedded Tissue.  
13 *Frontiers in medicine.* 2017;4:87. Epub 2017/07/12.
- 14   6.       Dobbins WO. Whipple's disease. Thomas Books. 1987;Springfield, IL.
- 15   7.       Maizel H, Ruffin JM, Dobbins WO, 3rd. Whipple's disease: a review of 19 patients from one  
16 hospital and a review of the literature since 1950. *Medicine (Baltimore).* 1970;49(3):175-205. Epub  
17 1970/05/01.
- 18   8.       Durand DV, Lecomte C, Cathebras P, Rousset H, Godeau P. Whipple disease. Clinical review of  
19 52 cases. The SNFMI Research Group on Whipple Disease. *Societe Nationale Francaise de Medecine*  
20 *Interne. Medicine (Baltimore).* 1997;76(3):170-84. Epub 1997/05/01.
- 21   9.       Fleming JL, Wiesner RH, Shorter RG. Whipple's disease: clinical, biochemical, and  
22 histopathologic features and assessment of treatment in 29 patients. *Mayo Clinic proceedings.*  
23 1988;63(6):539-51. Epub 1988/06/01.
- 24   10.      Mahnel R, Kalt A, Ring S, Stallmach A, Strober W, Marth T. Immunosuppressive therapy in  
25 Whipple's disease patients is associated with the appearance of gastrointestinal manifestations. *Am J*  
26 *Gastroenterol.* 2005;100(5):1167-73. Epub 2005/04/22.
- 27   11.      Schneider T, Moos V, Loddenkemper C, Marth T, Fenollar F, Raoult D. Whipple's disease: new  
28 aspects of pathogenesis and treatment. *Lancet Infect Dis.* 2008;8(3):179-90. Epub 2008/02/23.
- 29   12.      Fenollar F, Lepidi H, Raoult D. Whipple's endocarditis: review of the literature and comparisons  
30 with Q fever, Bartonella infection, and blood culture-positive endocarditis. *Clin Infect Dis.*  
31 2001;33(8):1309-16. Epub 2001/09/21.
- 32   13.      Gubler JG, Kuster M, Dutly F, Bannwart F, Krause M, Vogelin HP, et al. Whipple endocarditis  
33 without overt gastrointestinal disease: report of four cases. *Ann Intern Med.* 1999;131(2):112-6. Epub  
34 1999/07/27.
- 35   14.      Fenollar F, Lagier JC, Raoult D. Tropheryma whipplei and Whipple's disease. *J Infect.*  
36 2014;69(2):103-12. Epub 2014/06/01.
- 37   15.      Marumganti AR, Murphy TF. Whipple's disease: neurological relapse presenting as headache  
38 for two years. *Journal of general internal medicine.* 2008;23(12):2131-3. Epub 2008/09/12.
- 39   16.      Lagier JC, Fenollar F, Lepidi H, Raoult D. Evidence of lifetime susceptibility to Tropheryma  
40 whipplei in patients with Whipple's disease. *J Antimicrob Chemother.* 2011;66(5):1188-9. Epub  
41 2011/03/12.
- 42   17.      Fenollar F, Puechal X, Raoult D. Whipple's disease. *N Engl J Med.* 2007;356(1):55-66. Epub  
43 2007/01/05.
- 44   18.      Dobbins WO, 3rd. Is there an immune deficit in Whipple's disease? *Digestive diseases and*  
45 *sciences.* 1981;26(3):247-52. Epub 1981/03/01.
- 46   19.      Desnues B, Al Moussawi K, Fenollar F. New insights into Whipple's disease and Tropheryma  
47 whipplei infections. *Microbes Infect.* 2010;12(14-15):1102-10. Epub 2010/08/17.
- 48   20.      Fenollar F, Laouira S, Lepidi H, Rolain JM, Raoult D. Value of Tropheryma whipplei quantitative  
49 polymerase chain reaction assay for the diagnosis of Whipple disease: usefulness of saliva and stool  
50 specimens for first-line screening. *Clin Infect Dis.* 2008;47(5):659-67. Epub 2008/07/30.

- 1 21. Puechal X. Whipple's arthritis. *Joint, bone, spine : revue du rhumatisme*. 2016;83(6):631-5.  
2 Epub 2016/08/10.
- 3 22. Lagier JC, Fenollar F, Lepidi H, Raoult D. Failure and relapse after treatment with  
4 trimethoprim/sulfamethoxazole in classic Whipple's disease. *J Antimicrob Chemother*.  
5 2010;65(9):2005-12. Epub 2010/07/20.
- 6 23. Bakkali N, Fenollar F, Biswas S, Rolain JM, Raoult D. Acquired resistance to trimethoprim-  
7 sulfamethoxazole during Whipple disease and expression of the causative target gene. *J Infect Dis*.  
8 2008;198(1):101-8. Epub 2008/05/27.
- 9 24. Ehrbar HU, Bauerfeind P, Dutly F, Koelz HR, Altwegg M. PCR-positive tests for *Tropheryma*  
10 *whippelii* in patients without Whipple's disease. *Lancet*. 1999;353(9171):2214. Epub 1999/07/07.
- 11 25. Amsler L, Bauernfeind P, Nigg C, Maibach RC, Steffen R, Altwegg M. Prevalence of *Tropheryma*  
12 *whipplei* DNA in patients with various gastrointestinal diseases and in healthy controls. *Infection*.  
13 2003;31(2):81-5. Epub 2003/04/12.
- 14 26. Maibach RC, Dutly F, Altwegg M. Detection of *Tropheryma whipplei* DNA in feces by PCR using  
15 a target capture method. *J Clin Microbiol*. 2002;40(7):2466-71. Epub 2002/06/29.
- 16 27. Street S, Donoghue HD, Neild GH. *Tropheryma whippelii* DNA in saliva of healthy people.  
17 *Lancet*. 1999;354(9185):1178-9. Epub 1999/10/08.
- 18 28. Rolain JM, Fenollar F, Raoult D. False positive PCR detection of *Tropheryma whipplei* in the  
19 saliva of healthy people. *BMC Microbiol*. 2007;7:48. Epub 2007/05/31.
- 20 29. Fenollar F, Amphoux B, Raoult D. A paradoxical *Tropheryma whipplei* western blot  
21 differentiates patients with whipple disease from asymptomatic carriers. *Clin Infect Dis*.  
22 2009;49(5):717-23. Epub 2009/07/29.
- 23 30. Fenollar F, Trani M, Davoust B, Salle B, Birg ML, Rolain JM, et al. Prevalence of asymptomatic  
24 *Tropheryma whipplei* carriage among humans and nonhuman primates. *J Infect Dis*. 2008;197(6):880-  
25 7. Epub 2008/04/19.
- 26 31. Li W, Fenollar F, Rolain JM, Fournier PE, Feurle GE, Muller C, et al. Genotyping reveals a wide  
27 heterogeneity of *Tropheryma whipplei*. *Microbiology*. 2008;154(Pt 2):521-7. Epub 2008/01/30.
- 28 32. Ponz de Leon M, Borghi A, Ferrara F, Contri M, Roncucci L. Whipple's disease in a father-son  
29 pair. *Internal and emergency medicine*. 2006;1(3):254-6. Epub 2006/11/24.
- 30 33. Marth T, Moos V, Muller C, Biagi F, Schneider T. *Tropheryma whipplei* infection and Whipple's  
31 disease. *Lancet Infect Dis*. 2016;16(3):e13-22. Epub 2016/02/10.
- 32 34. Picard. C, Gaspar. HB, Al-Herz. W, Bousfiha. A, Casanova. J-L, Chatila. T, et al. International  
33 Union of Immunological Societies 2017 Primary Immunodeficiency Diseases Committee report on  
34 Inborn Errors of Immunity. *Journal of Clinical Immunology*. 2017;*In Press*.
- 35 35. Casanova JL. Severe infectious diseases of childhood as monogenic inborn errors of immunity.  
36 *Proc Natl Acad Sci U S A*. 2015;112(51):E7128-37. Epub 2015/12/02.
- 37 36. Casanova JL. Human genetic basis of interindividual variability in the course of infection. *Proc*  
38 *Natl Acad Sci U S A*. 2015;112(51):E7118-27. Epub 2015/12/02.
- 39 37. Lamborn IT, Jing H, Zhang Y, Drutman SB, Abbott JK, Munir S, et al. Recurrent rhinovirus  
40 infections in a child with inherited MDA5 deficiency. *J Exp Med*. 2017;214(7):1949-72. Epub  
41 2017/06/14.
- 42 38. Ogunjimi B, Zhang SY, Sorensen KB, Skipper KA, Carter-Timofte M, Kerner G, et al. Inborn errors  
43 in RNA polymerase III underlie severe varicella zoster virus infections. *J Clin Invest*. 2017;127(9):3543-  
44 56. Epub 2017/08/08.
- 45 39. Belkadi A, Pedergnana V, Cobat A, Itan Y, Vincent QB, Abhyankar A, et al. Whole-exome  
46 sequencing to analyze population structure, parental inbreeding, and familial linkage. *Proc Natl Acad*  
47 *Sci U S A*. 2016;113(24):6713-8. Epub 2016/06/02.
- 48 40. Ikushima H, Negishi H, Taniguchi T. The IRF family transcription factors at the interface of  
49 innate and adaptive immune responses. *Cold Spring Harbor symposia on quantitative biology*.  
50 2013;78:105-16. Epub 2013/10/05.

- 1 41. Shaffer AL, Emre NC, Romesser PB, Staudt LM. IRF4: Immunity. Malignancy! Therapy? Clinical  
2 cancer research : an official journal of the American Association for Cancer Research. 2009;15(9):2954-  
3 61. Epub 2009/04/23.
- 4 42. Tominaga N, Ohkusu-Tsukada K, Udono H, Abe R, Matsuyama T, Yui K. Development of Th1  
5 and not Th2 immune responses in mice lacking IFN-regulatory factor-4. International immunology.  
6 2003;15(1):1-10. Epub 2002/12/28.
- 7 43. Tamura T, Tailor P, Yamaoka K, Kong HJ, Tsujimura H, O'Shea JJ, et al. IFN regulatory factor-4  
8 and -8 govern dendritic cell subset development and their functional diversity. J Immunol.  
9 2005;174(5):2573-81. Epub 2005/02/25.
- 10 44. Suzuki S, Honma K, Matsuyama T, Suzuki K, Toriyama K, Akitoyo I, et al. Critical roles of  
11 interferon regulatory factor 4 in CD11bhighCD8alpha- dendritic cell development. Proc Natl Acad Sci  
12 U S A. 2004;101(24):8981-6. Epub 2004/06/09.
- 13 45. Mittrucker HW, Matsuyama T, Grossman A, Kundig TM, Potter J, Shahinian A, et al.  
14 Requirement for the transcription factor LSIRF/IRF4 for mature B and T lymphocyte function. Science.  
15 1997;275(5299):540-3. Epub 1997/01/24.
- 16 46. Lohoff M, Mittrucker HW, Pechtl S, Bischof S, Sommer F, Kock S, et al. Dysregulated T helper  
17 cell differentiation in the absence of interferon regulatory factor 4. Proc Natl Acad Sci U S A.  
18 2002;99(18):11808-12. Epub 2002/08/22.
- 19 47. Klein U, Casola S, Cattoretti G, Shen Q, Lia M, Mo T, et al. Transcription factor IRF4 controls  
20 plasma cell differentiation and class-switch recombination. Nat Immunol. 2006;7(7):773-82. Epub  
21 2006/06/13.
- 22 48. Escalante CR, Brass AL, Pongubala JM, Shatova E, Shen L, Singh H, et al. Crystal structure of  
23 PU.1/IRF-4/DNA ternary complex. Mol Cell. 2002;10(5):1097-105. Epub 2002/11/28.
- 24 49. Brass AL, Zhu AQ, Singh H. Assembly requirements of PU.1-Pip (IRF-4) activator complexes:  
25 inhibiting function in vivo using fused dimers. EMBO J. 1999;18(4):977-91. Epub 1999/02/18.
- 26 50. Kircher M, Witten DM, Jain P, O'Roak BJ, Cooper GM, Shendure J. A general framework for  
27 estimating the relative pathogenicity of human genetic variants. Nat Genet. 2014;46(3):310-5. Epub  
28 2014/02/04.
- 29 51. Itan Y, Shang L, Boisson B, Ciancanelli MJ, Markle JG, Martinez-Barricarte R, et al. The mutation  
30 significance cutoff: gene-level thresholds for variant predictions. Nature methods. 2016;13(2):109-10.  
31 Epub 2016/01/29.
- 32 52. Itan Y, Shang L, Boisson B, Patin E, Bolze A, Moncada-Velez M, et al. The human gene damage  
33 index as a gene-level approach to prioritizing exome variants. Proc Natl Acad Sci U S A.  
34 2015;112(44):13615-20. Epub 2015/10/21.
- 35 53. Eilertson KE, Booth JG, Bustamante CD. SnIPRE: selection inference using a Poisson random  
36 effects model. PLoS computational biology. 2012;8(12):e1002806. Epub 2012/12/14.
- 37 54. Lek M, Karczewski KJ, Minikel EV, Samocha KE, Banks E, Fennell T, et al. Analysis of protein-  
38 coding genetic variation in 60,706 humans. Nature. 2016;536(7616):285-91. Epub 2016/08/19.
- 39 55. Lau JF, Parisien JP, Horvath CM. Interferon regulatory factor subcellular localization is  
40 determined by a bipartite nuclear localization signal in the DNA-binding domain and interaction with  
41 cytoplasmic retention factors. Proc Natl Acad Sci U S A. 2000;97(13):7278-83. Epub 2000/06/22.
- 42 56. Quintana-Murci L, Clark AG. Population genetic tools for dissecting innate immunity in humans.  
43 Nat Rev Immunol. 2013;13(4):280-93. Epub 2013/03/09.
- 44 57. Barreiro LB, Quintana-Murci L. From evolutionary genetics to human immunology: how  
45 selection shapes host defence genes. Nature reviews Genetics. 2010;11(1):17-30. Epub 2009/12/03.
- 46 58. Rieux-Laucat F, Casanova JL. Immunology. Autoimmunity by haploinsufficiency. Science.  
47 2014;345(6204):1560-1. Epub 2014/09/27.
- 48 59. Afzali B, Gronholm J, Vandrovцова J, O'Brien C, Sun HW, Vanderleyden I, et al. BACH2  
49 immunodeficiency illustrates an association between super-enhancers and haploinsufficiency. Nat  
50 Immunol. 2017;18(7):813-23. Epub 2017/05/23.

- 1 60. Perez de Diego R, Sancho-Shimizu V, Lorenzo L, Puel A, Plancoulaine S, Picard C, et al. Human  
2 TRAF3 adaptor molecule deficiency leads to impaired Toll-like receptor 3 response and susceptibility  
3 to herpes simplex encephalitis. *Immunity*. 2010;33(3):400-11. Epub 2010/09/14.
- 4 61. Purcell S, Neale B, Todd-Brown K, Thomas L, Ferreira MA, Bender D, et al. PLINK: a tool set for  
5 whole-genome association and population-based linkage analyses. *Am J Hum Genet*. 2007;81(3):559-  
6 75. Epub 2007/08/19.
- 7 62. Abecasis GR, Cherny SS, Cookson WO, Cardon LR. Merlin--rapid analysis of dense genetic maps  
8 using sparse gene flow trees. *Nat Genet*. 2002;30(1):97-101. Epub 2001/12/04.
- 9 63. Bogunovic D, Byun M, Durfee LA, Abhyankar A, Sanal O, Mansouri D, et al. Mycobacterial  
10 Disease and Impaired IFN-gamma Immunity in Humans with Inherited ISG15 Deficiency. *Science*. 2012.  
11 Epub 2012/08/04.
- 12 64. Byun M, Abhyankar A, Lelarge V, Plancoulaine S, Palanduz A, Telhan L, et al. Whole-exome  
13 sequencing-based discovery of STIM1 deficiency in a child with fatal classic Kaposi sarcoma. *J Exp Med*.  
14 2010;207(11):2307-12. Epub 2010/09/30.
- 15 65. Li H, Durbin R. Fast and accurate short read alignment with Burrows-Wheeler transform.  
16 *Bioinformatics*. 2009;25(14):1754-60. Epub 2009/05/20.
- 17 66. McKenna A, Hanna M, Banks E, Sivachenko A, Cibulskis K, Kernytsky A, et al. The Genome  
18 Analysis Toolkit: a MapReduce framework for analyzing next-generation DNA sequencing data.  
19 *Genome Res*. 2010;20(9):1297-303. Epub 2010/07/21.
- 20 67. Li H, Handsaker B, Wysoker A, Fennell T, Ruan J, Homer N, et al. The Sequence Alignment/Map  
21 format and SAMtools. *Bioinformatics*. 2009;25(16):2078-9. Epub 2009/06/10.
- 22 68. Wang K, Li M, Hakonarson H. ANNOVAR: functional annotation of genetic variants from high-  
23 throughput sequencing data. *Nucleic acids research*. 2010;38(16):e164. Epub 2010/07/06.
- 24 69. Gautier L, Cope L, Bolstad BM, Irizarry RA. affy--analysis of Affymetrix GeneChip data at the  
25 probe level. *Bioinformatics*. 2004;20(3):307-15. Epub 2004/02/13.
- 26 70. Irizarry RA, Hobbs B, Collin F, Beazer-Barclay YD, Antonellis KJ, Scherf U, et al. Exploration,  
27 normalization, and summaries of high density oligonucleotide array probe level data. *Biostatistics*.  
28 2003;4(2):249-64. Epub 2003/08/20.
- 29 71. Alsina L, Israelsson E, Altman MC, Dang KK, Ghandil P, Israel L, et al. A narrow repertoire of  
30 transcriptional modules responsive to pyogenic bacteria is impaired in patients carrying loss-of-  
31 function mutations in MYD88 or IRAK4. *Nat Immunol*. 2014;15(12):1134-42. Epub 2014/10/27.
- 32 72. Ma CS, Avery DT, Chan A, Batten M, Bustamante J, Boisson-Dupuis S, et al. Functional STAT3  
33 deficiency compromises the generation of human T follicular helper cells. *Blood*. 2012;119(17):3997-  
34 4008. Epub 2012/03/10.
- 35 73. Edouard S, Fenollar F, Raoult D. The rise of *Tropheryma whipplei*: a 12-year retrospective study  
36 of PCR diagnoses in our reference center. *J Clin Microbiol*. 2012;50(12):3917-20. Epub 2012/09/28.
- 37 74. Shukla V, Lu R. IRF4 and IRF8: Governing the virtues of B Lymphocytes. *Frontiers in biology*.  
38 2014;9(4):269-82. Epub 2014/12/17.
- 39 75. Huber M, Lohoff M. IRF4 at the crossroads of effector T-cell fate decision. *Eur J Immunol*.  
40 2014;44(7):1886-95. Epub 2014/05/02.

41

42

Figure 3

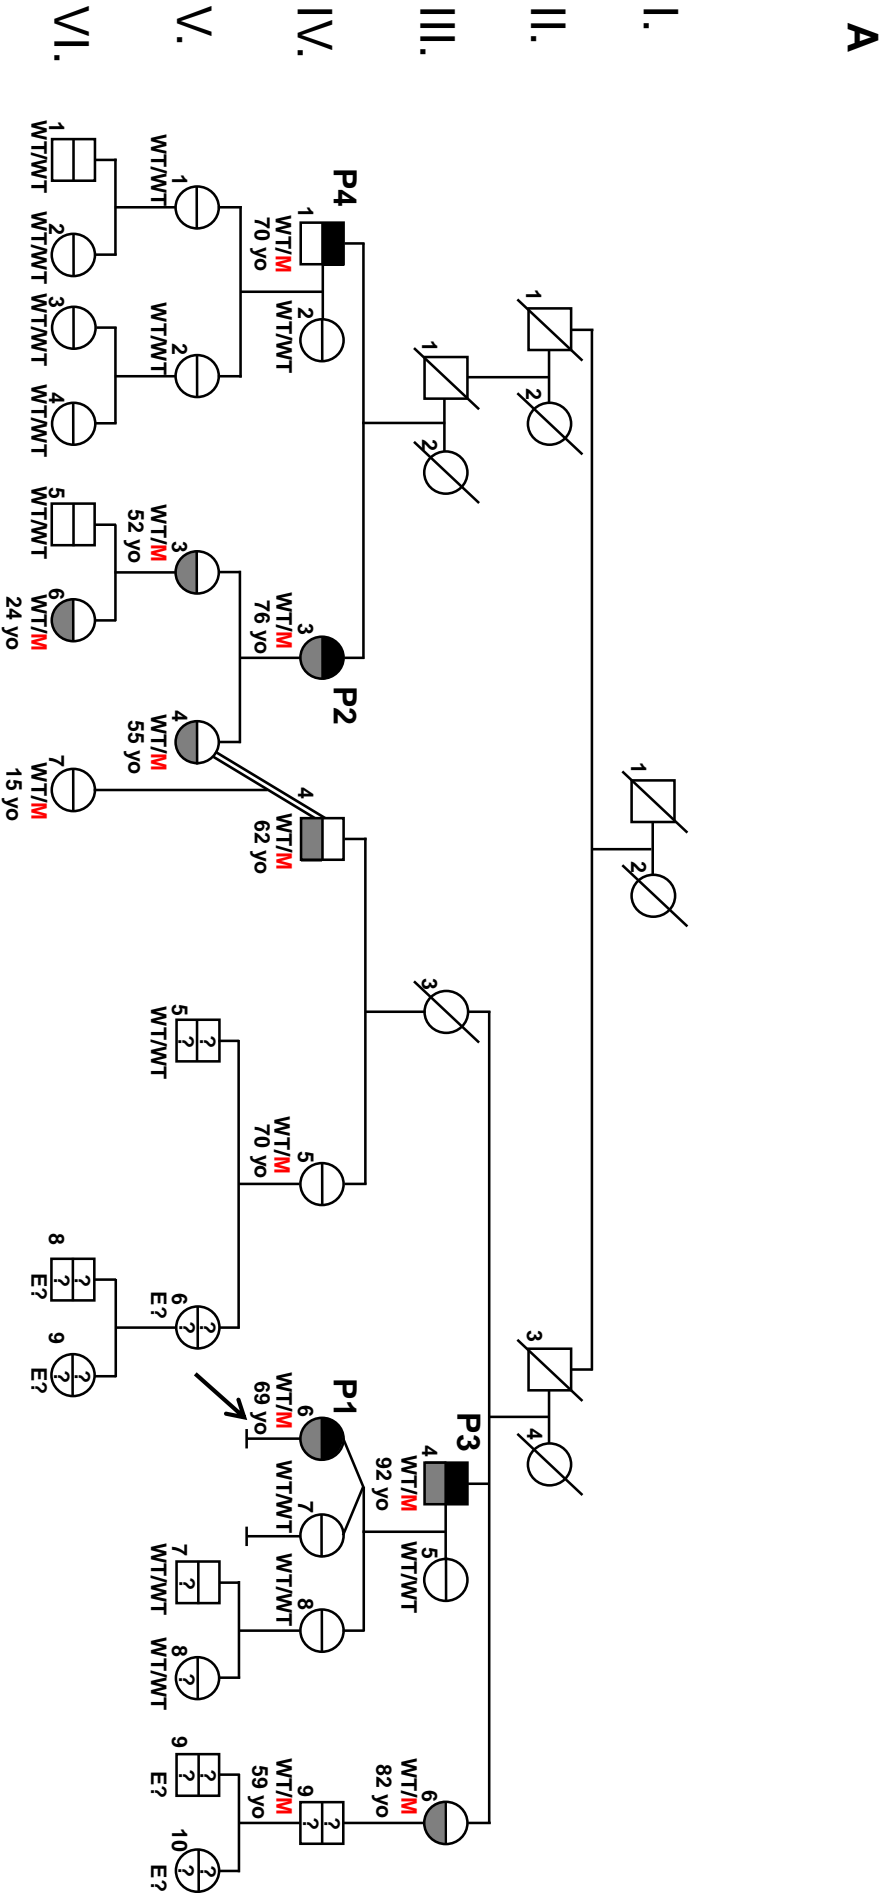

A

I.

II.

III.

IV.

V.

VI.

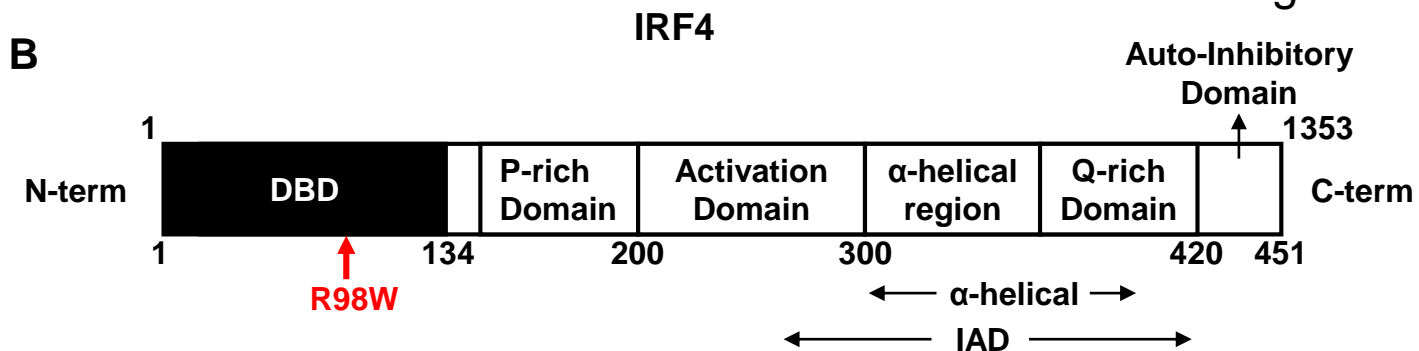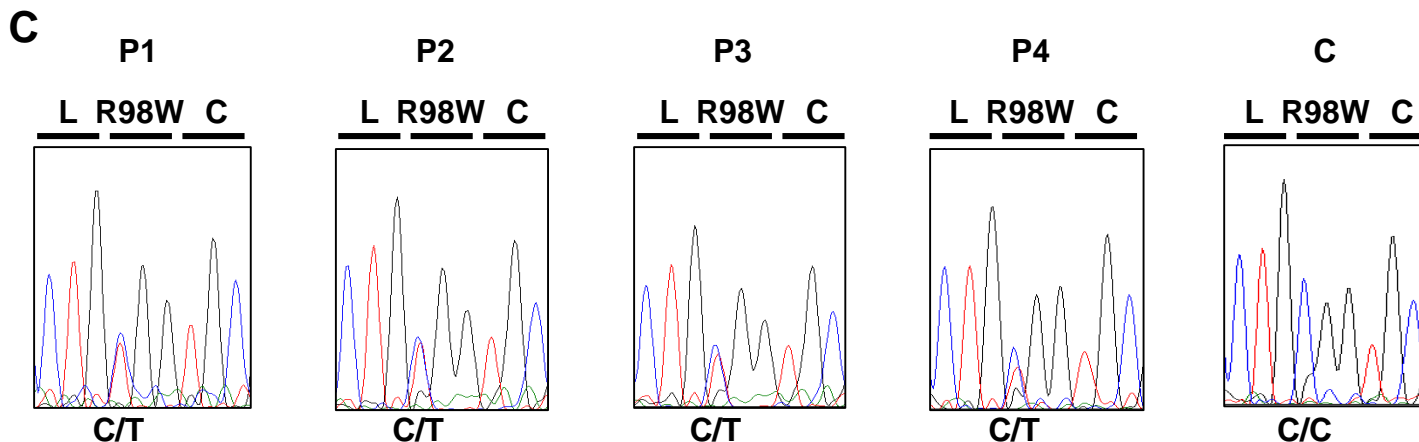

**D**

|                                 |                                                                           |
|---------------------------------|---------------------------------------------------------------------------|
| <i>Homo sapiens</i>             | AWALFKGKFFREGIDKDPPTWKTRL <b>R</b> CALNKSNDFEELVERSQLDISDPYKVYRIVPEGAKKG  |
| <i>Pan troglodytes</i>          | AWALFKGKFFREGIDKDPPTWKTRL <b>R</b> CALNKSNDFEELVERSQLDISDPYKVYRIVPEGAKKG  |
| <i>Nomascus leucogenys</i>      | AWALFKGKFFREGIDKDPPTWKTRL <b>R</b> CALNKSNDFEELVERSQLDISDPYKVYRIVPEGAKKG  |
| <i>Macaca mulatta</i>           | AWALFKGKFFREGIDKDPPTWKTRL <b>R</b> CALNKSNDFEELVERSQLDISDPYKVYRIVPEGAKKG  |
| <i>Rattus norvegicus</i>        | AWALFKGKFFREGIDKDPPTWKTRL <b>R</b> CALNKSNDFEELVERSQLDISDPYKVYRIVPEGAKKG  |
| <i>Mus musculus</i>             | AWALFKGKFFREGIDKDPPTWKTRL <b>R</b> CALNKSNDFEELVERSQLDISDPYKVYRIVPEGAKKG  |
| <i>Canis familiaris</i>         | AWALFKGKFFREGIDKDPPTWKTRL <b>R</b> CALNKSNDFEELVERSQLDISDPYKVYRIVPEGAKKG  |
| <i>Ornithorhynchus anaticus</i> | AWALFKGKFFREGIDKDPPTWKTRL <b>R</b> CALNKSNDFEELVERSQLDISDPYKVYRIVPEGAKKG  |
| <i>Gallus gallus</i>            | AWALFKGKFFREGIDKDPPTWKTRL <b>R</b> CALNKSNDFEELVERSQLDISDPYKVYRIVPEGAKKG  |
| <i>Xenopus tropicalis</i>       | AWALFKGKYREGIDKDPPTWKTRL <b>R</b> CALNKSNDFEELVERSQLDISDPYKVYKI I PEGSKKG |
| <i>Tetraodon nigroviridis</i>   | AWALFKGKFFREGIDKDPPTWKTRL <b>R</b> CALNKSNDFEELVDRSQLDISDPYKVYRIVPGGCQKK  |
| <i>Danio rerio</i>              | AWALFKGKFFREGVDKDPPTWKTRL <b>R</b> CALNKSNDFEEIVERSQLDISDPYKVYRIVPEGSKKG  |



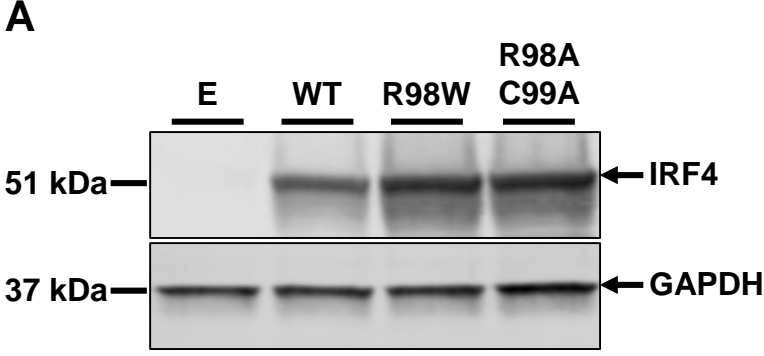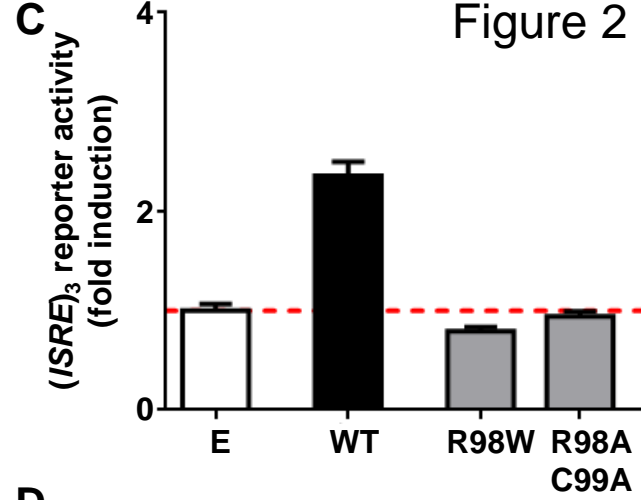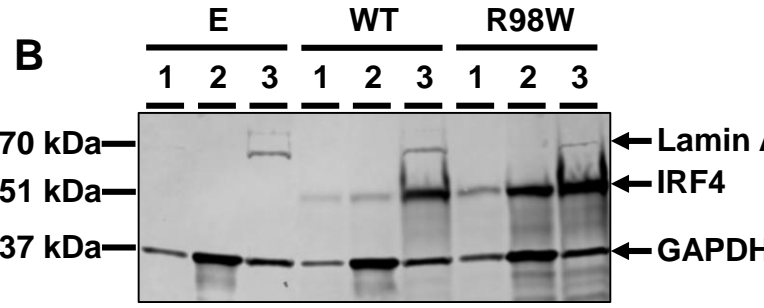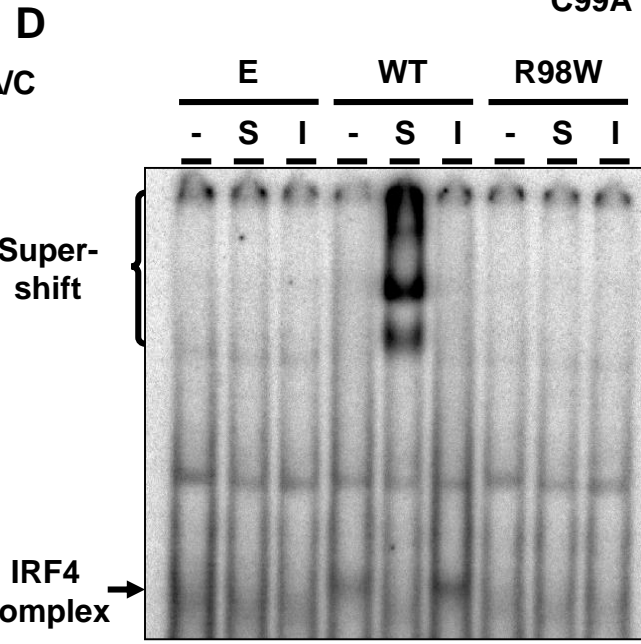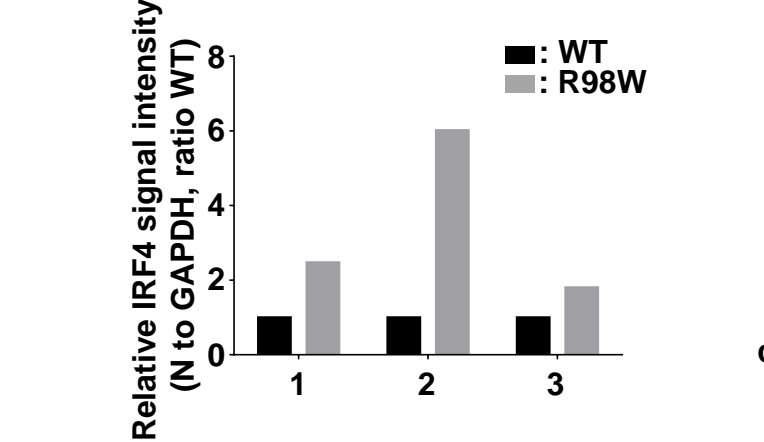

1: Total cell- ; 2: Cytoplasmic- ; 3: Nuclear-extract

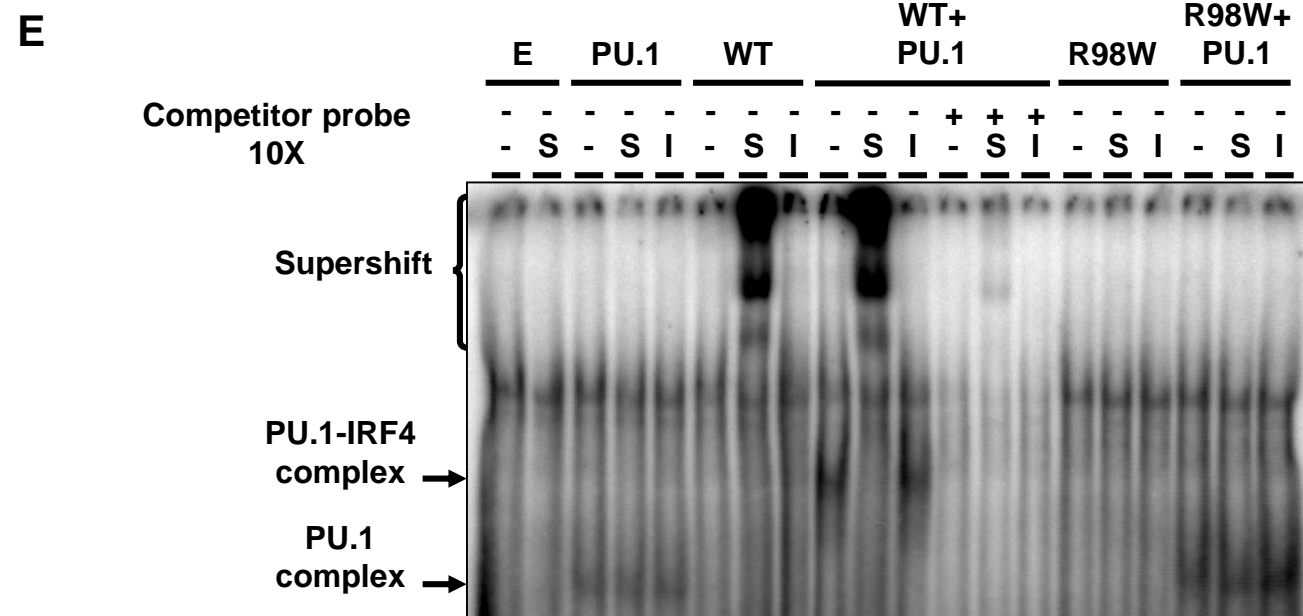

Figure 3

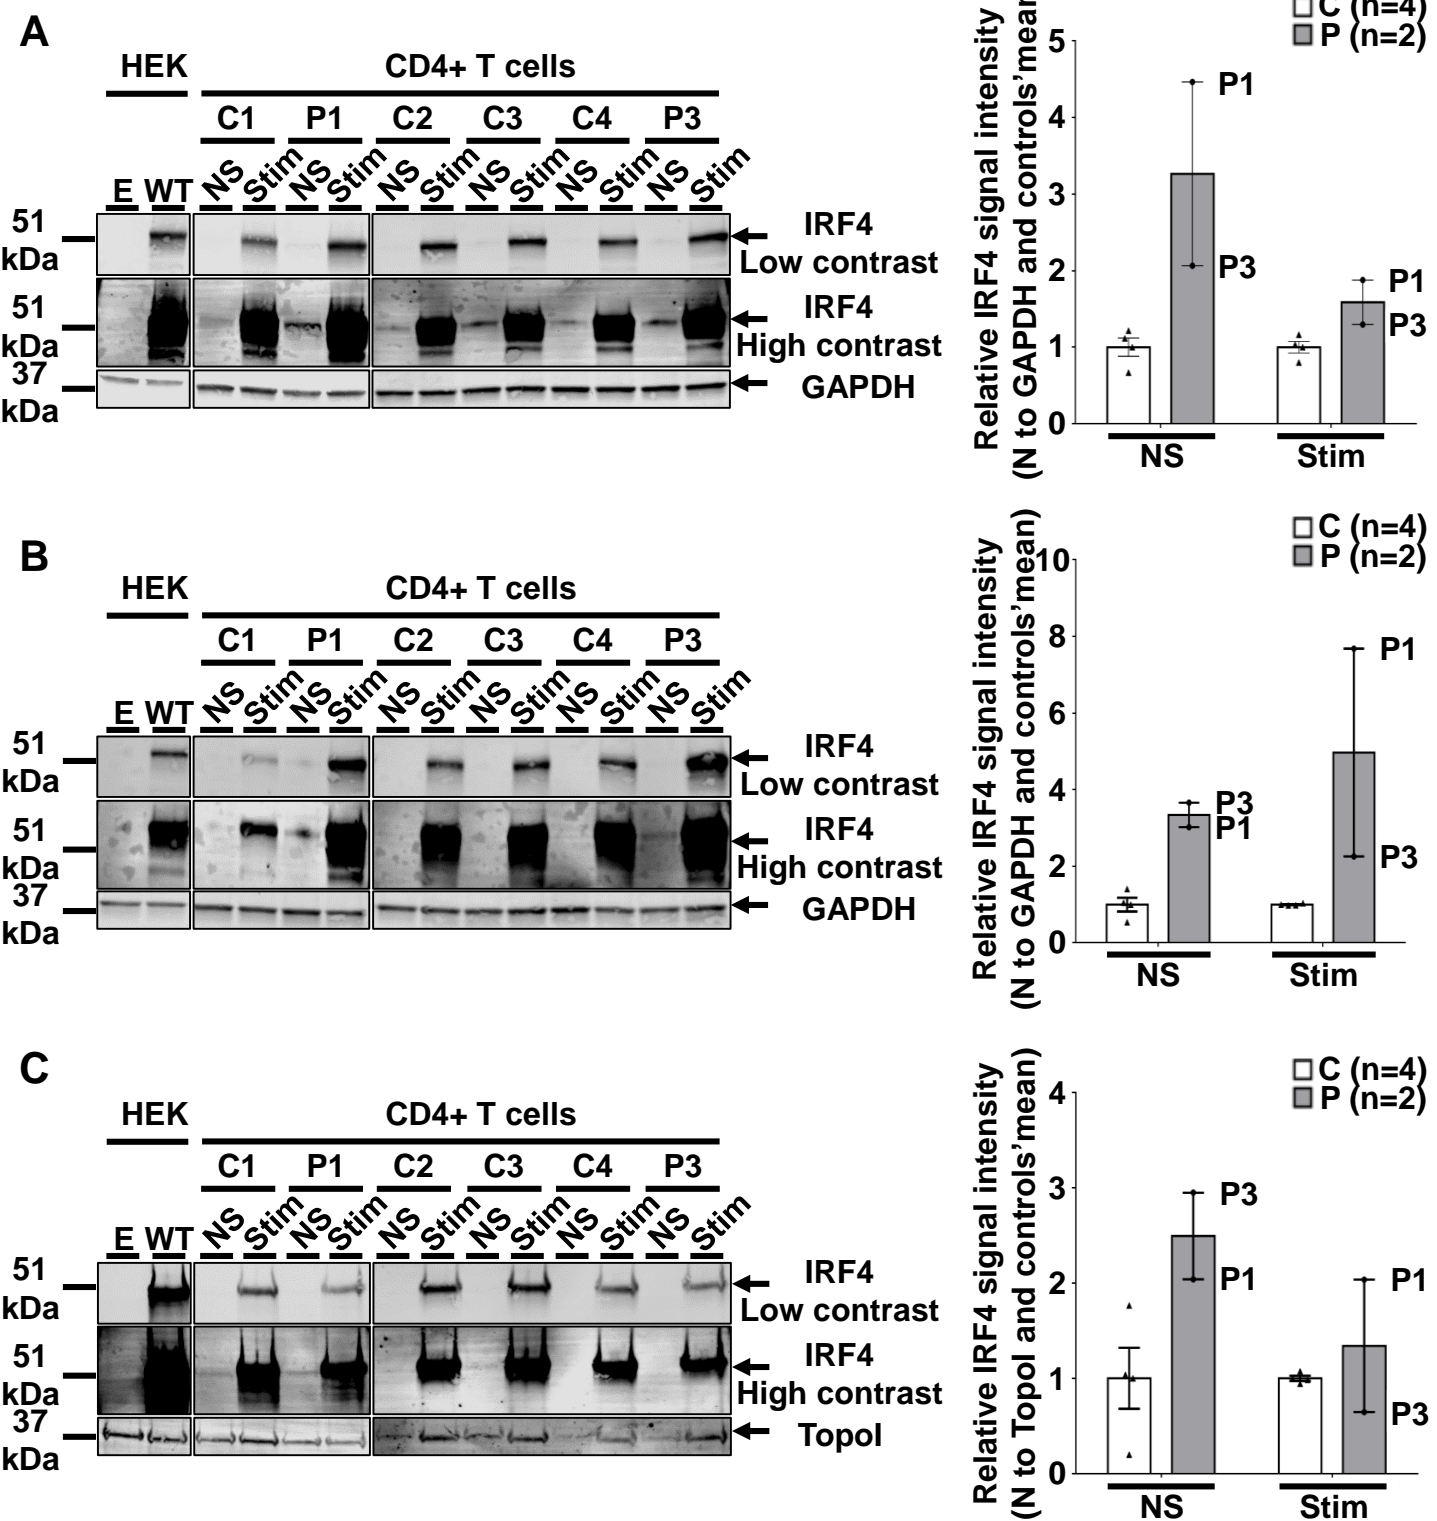

A

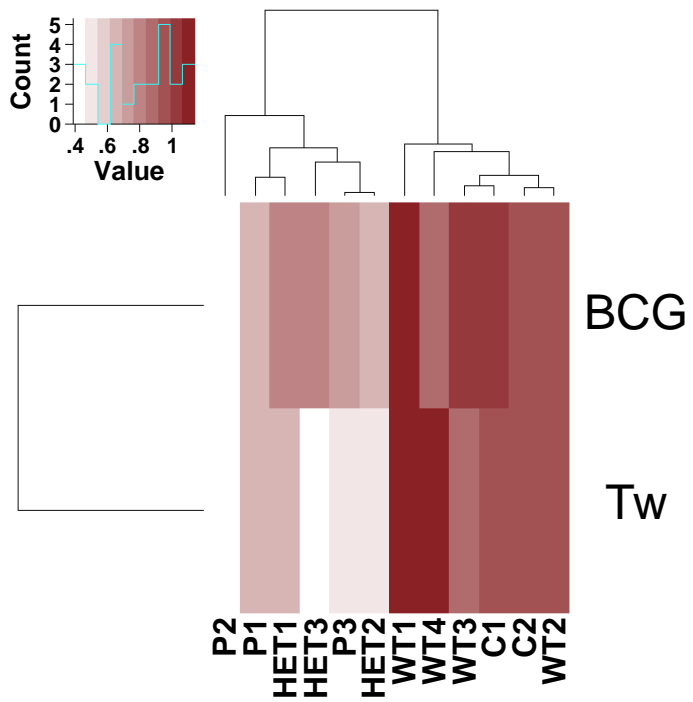

B

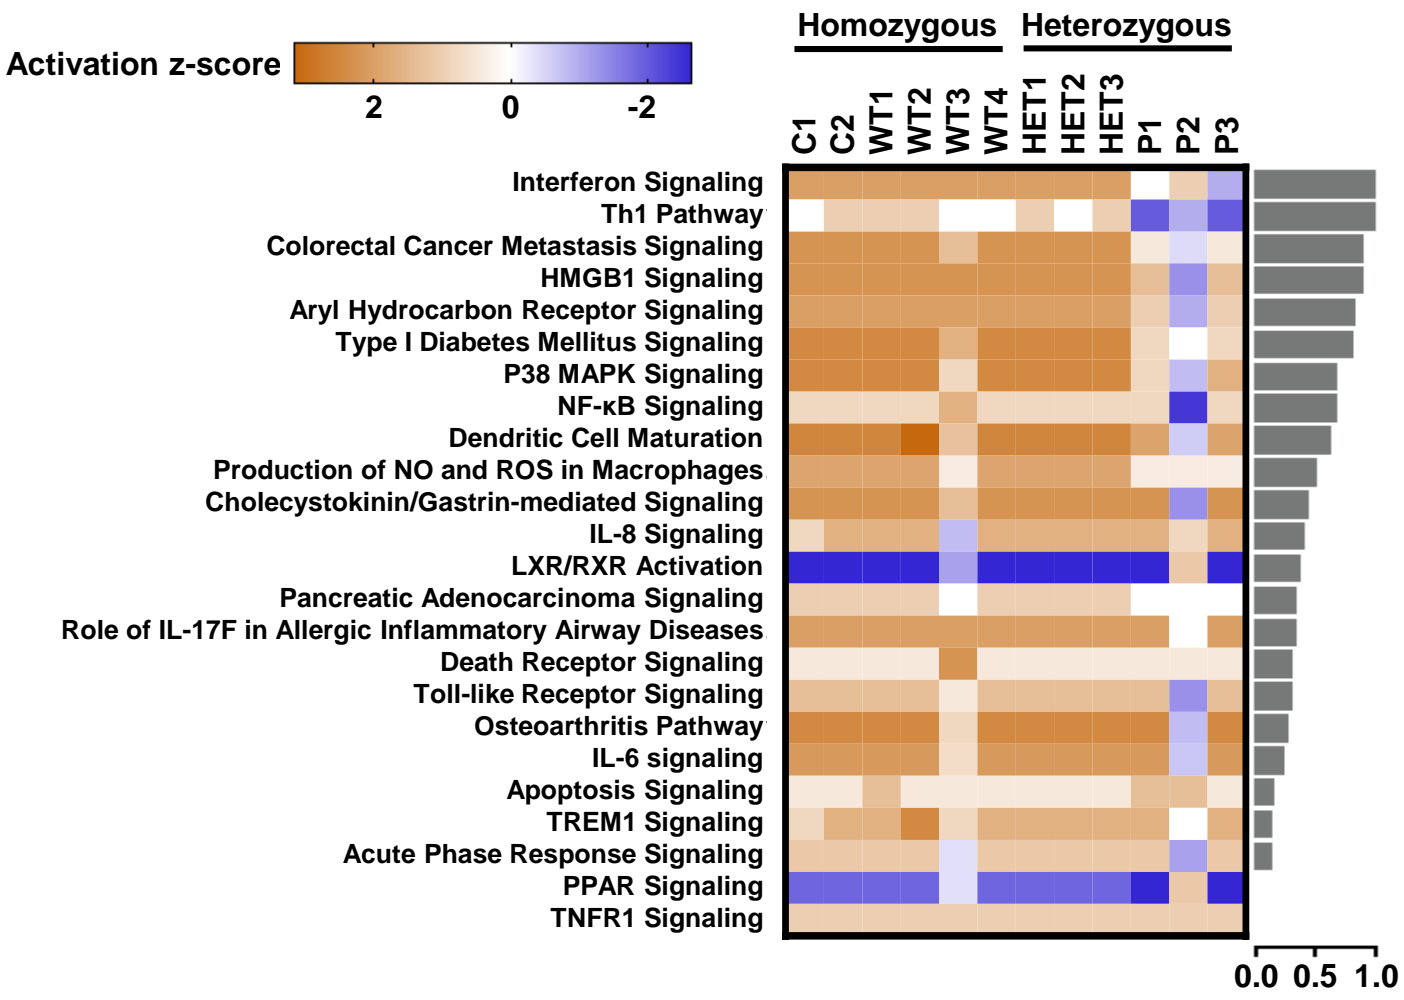

A

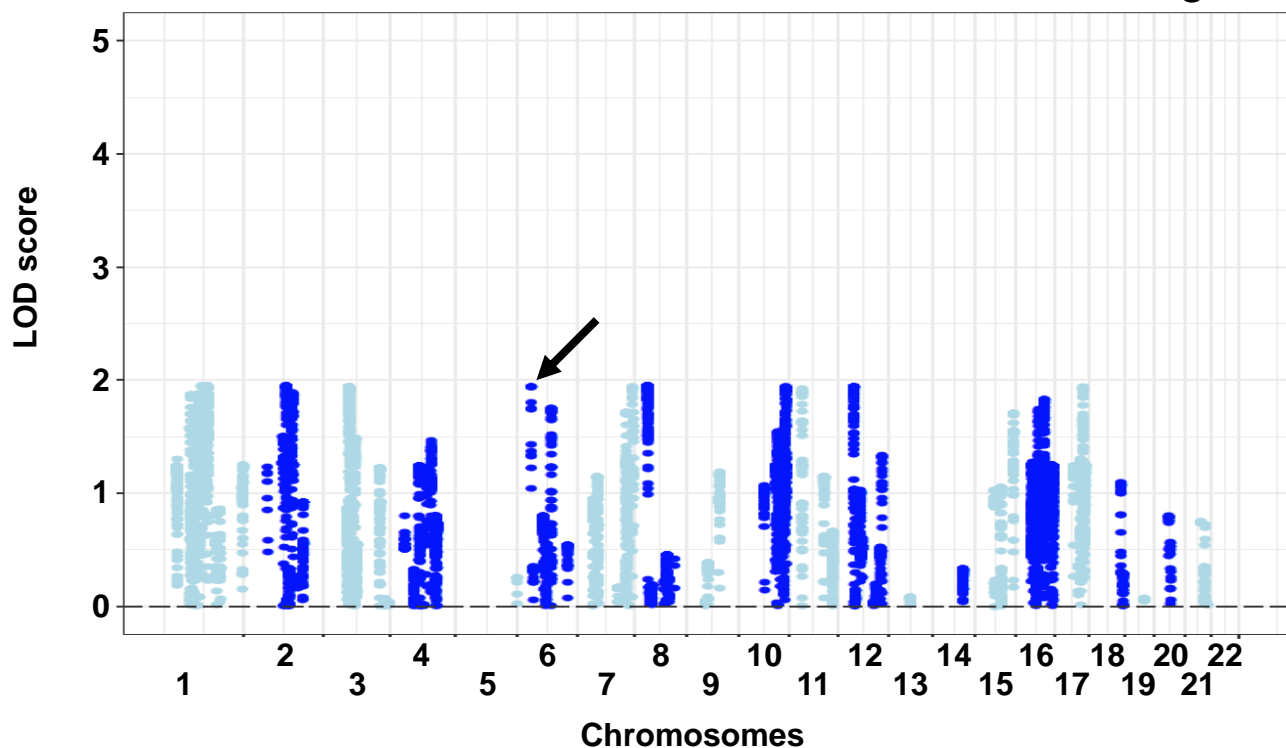

B

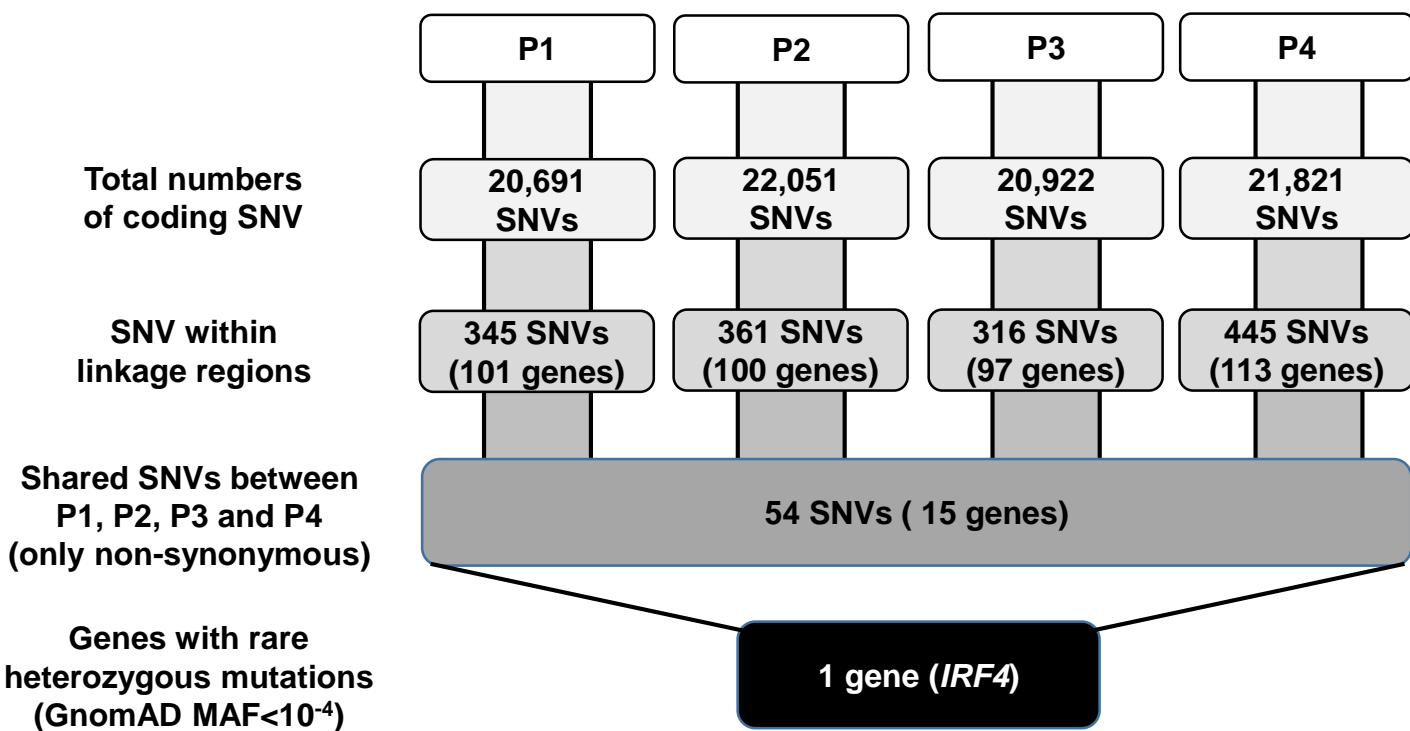

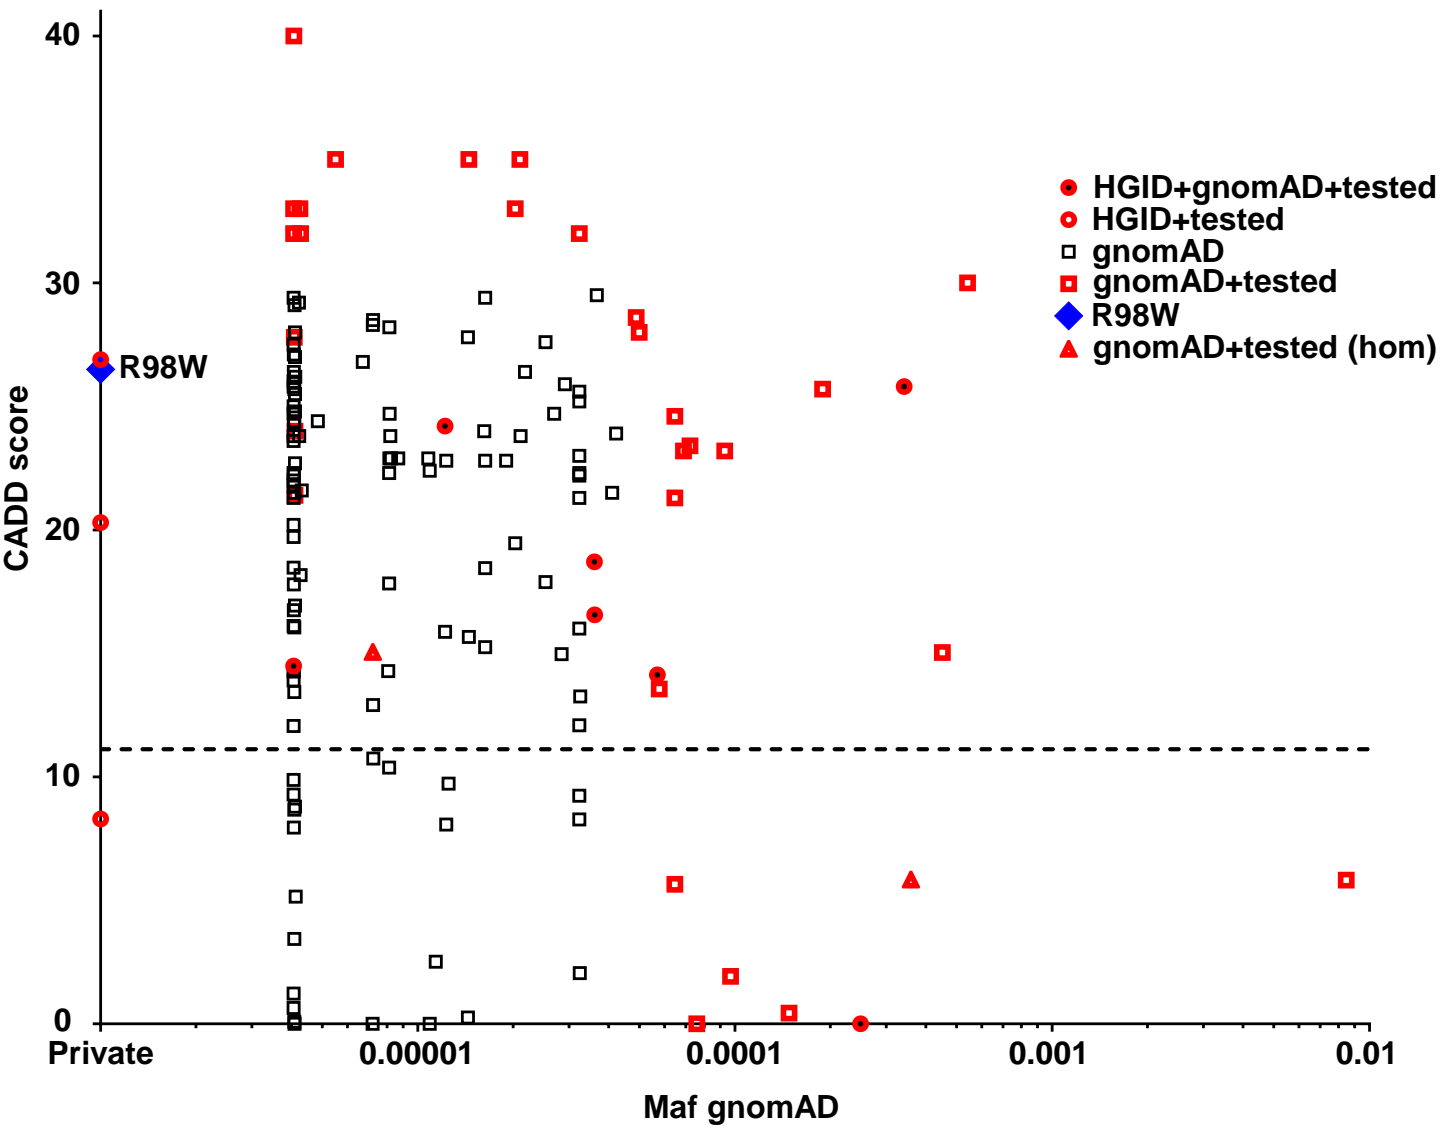

A

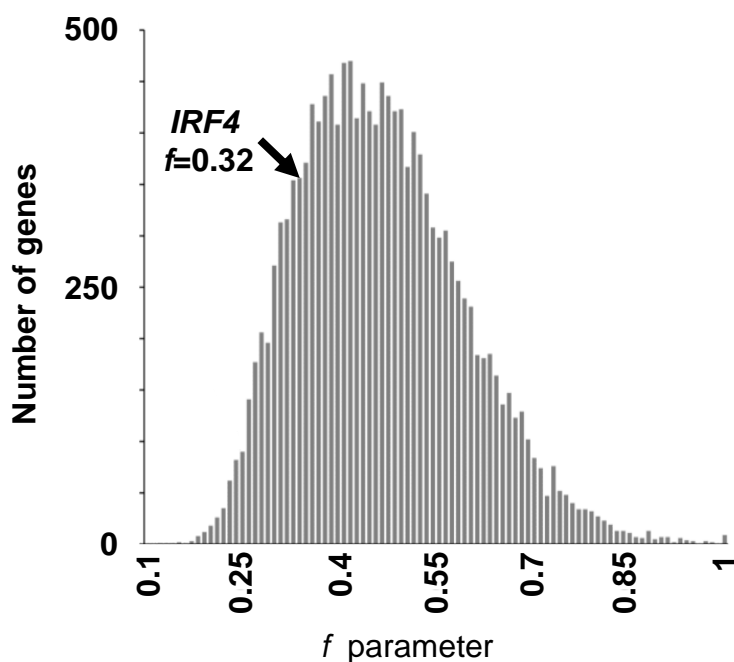

B

| Protein Variants | CADD score | MAF      |
|------------------|------------|----------|
| p.(R8L)          | 28         | 4.99E-05 |
| p.(R8Q)          | 25.7       | 1.89E-04 |
| p.(W27Yfs)       | 35         | 5.51E-06 |
| p.(W74Gfs)       | 40         | 4.07E-06 |
| p.(R82*)         | 24         | 4.10E-06 |
| p.(P88A)         | 18.71      | 3.61E-05 |
| p.(P88L)         | 33         | 4.06E-06 |
| p.(P88Q)         | 30         | 5.41E-04 |
| p.(N105S)        | 13.56      | 5.77E-05 |
| p.(R113W)        | 32         | 4.06E-06 |
| p.(S149N)        | 5.825      | 8.45E-03 |
| p.(Y152Lfs)      | 27.8       | 4.08E-06 |
| p.(S160Rfs)      | 21.4       | 4.10E-06 |
| p.(V182I)        | 14.49      | 4.06E-06 |
| p.(R201H)        | 24.2       | 1.22E-05 |
| p.(G202S)        | 0.004      | 7.58E-05 |
| p.(P208Q)        | 23.4       | 7.22E-05 |
| p.(C214F)        | 16.56      | 3.61E-05 |
| p.(P225T)        | 24.6       | 6.46E-05 |
| p.(R259W)        | 33         | 4.07E-06 |
| p.(R275W)        | 32         | 3.23E-05 |
| p.(D283E)        | 0.003      | 2.49E-04 |
| p.(A284T)        | 14.13      | 5.69E-05 |
| p.(A284V)        | 21.3       | 6.46E-05 |
| p.(N298S)        | 0.434      | 1.48E-04 |
| p.(A326V)        | 23.2       | 6.88E-05 |
| p.(A341V)        | 25.8       | 3.42E-04 |
| p.(A370V)        | 15.04      | 4.51E-04 |
| p.(R376C)        | 33         | 2.03E-05 |
| p.(R376H)        | 28.6       | 4.88E-05 |
| p.(L406P)        | 5.648      | 6.46E-05 |
| p.(R411K)        | 23.2       | 9.29E-05 |
| p.(I434F)        | 1.929      | 9.69E-05 |
| p.(R445C)        | 35         | 2.10E-05 |
| p.(S447F)        | 33         | 4.25E-06 |
| p.(S448F)        | 32         | 4.27E-06 |

C

| Protein variants | CADD score | MAF     |
|------------------|------------|---------|
| p.M170V          | 8.301      | Private |
| p.(R442G)        | 26.9       | Private |
| p.(G279_H280del) | 20.3       | Private |

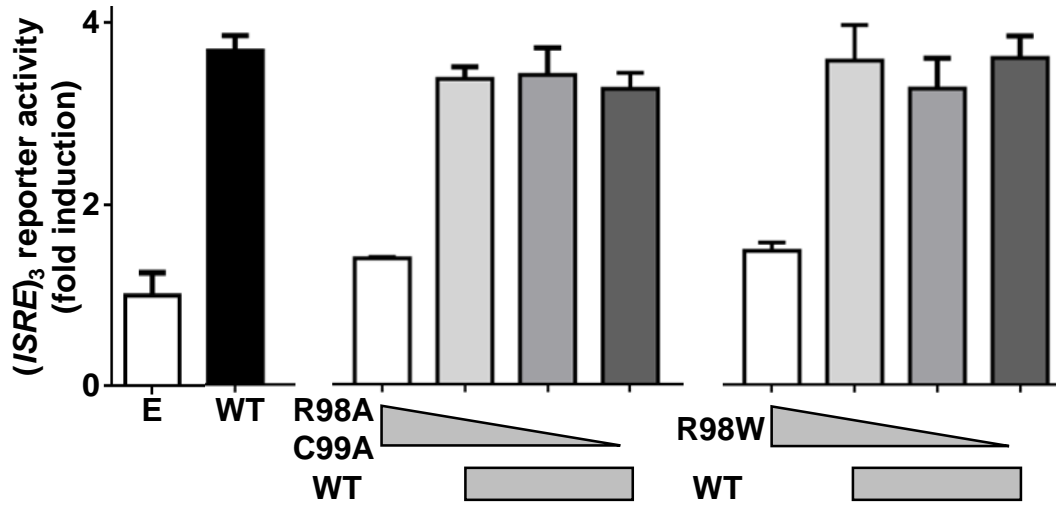

A

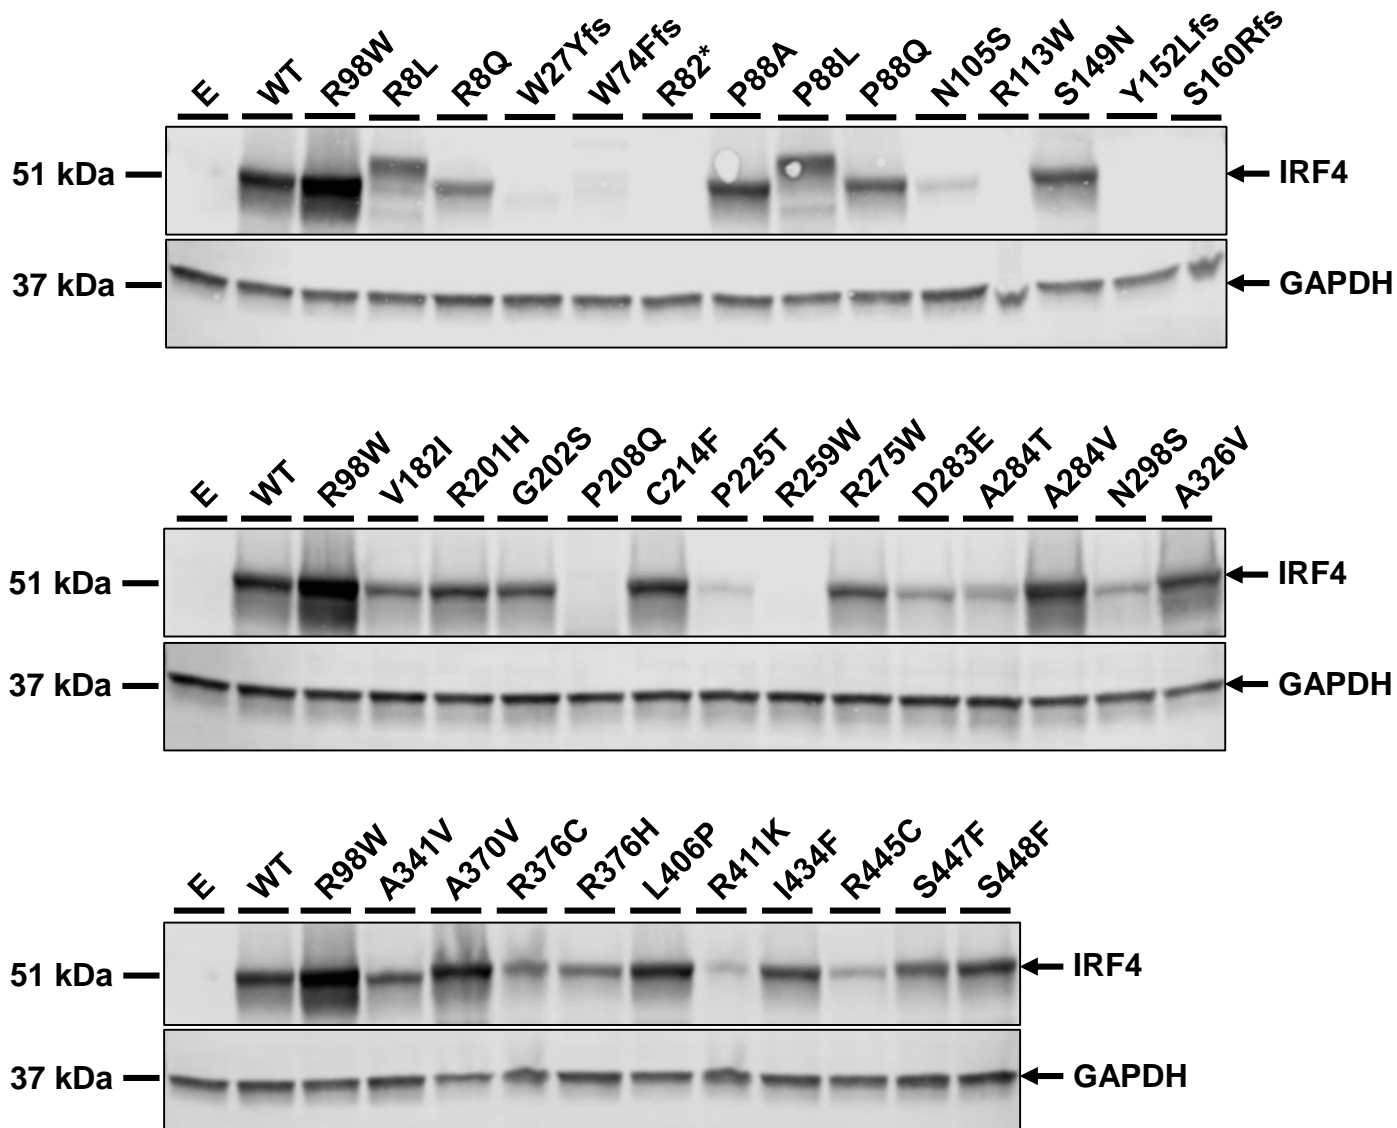

B

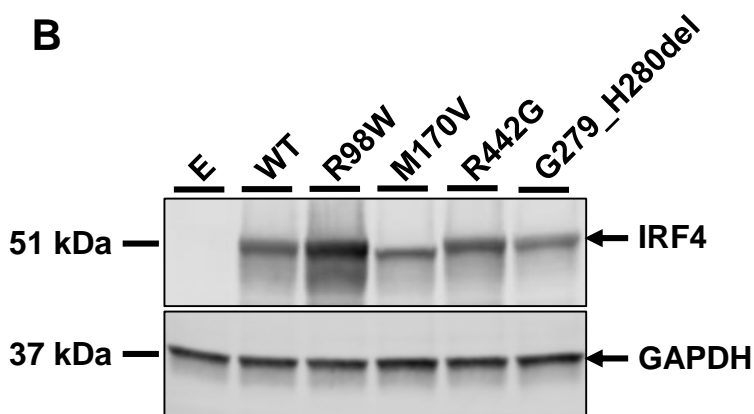



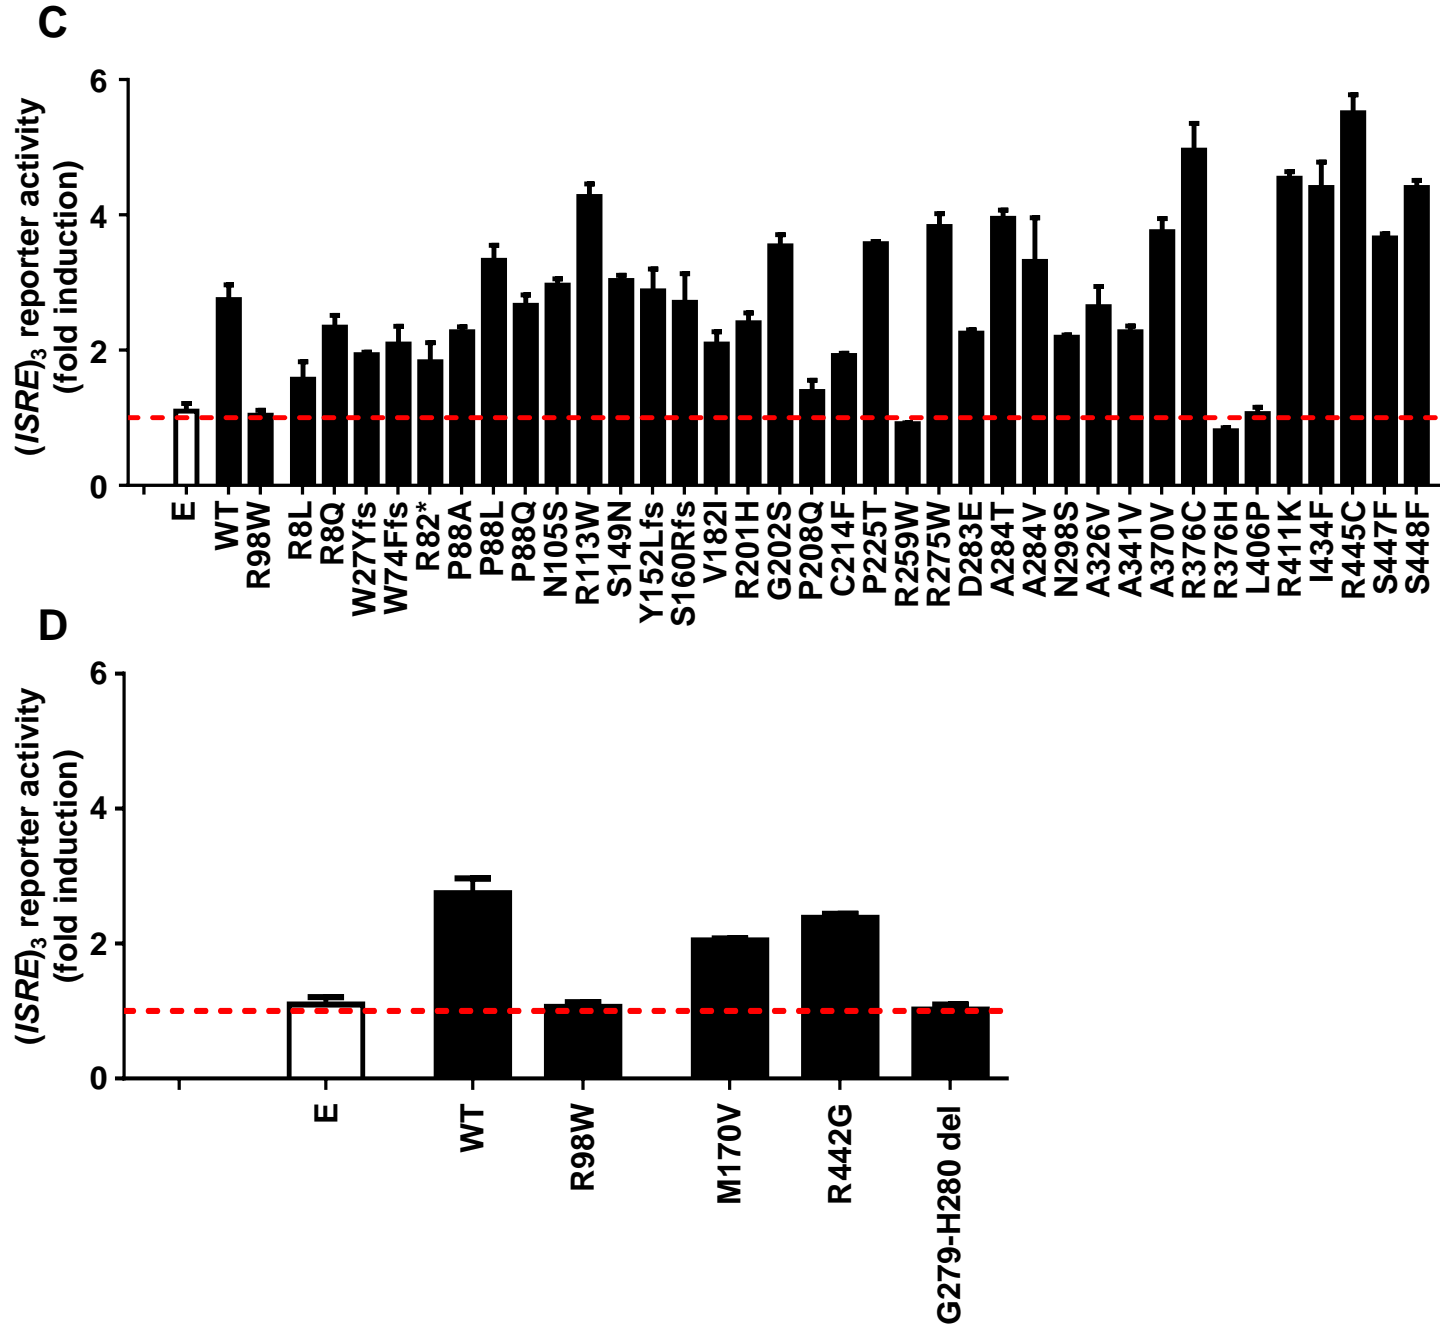

**A**

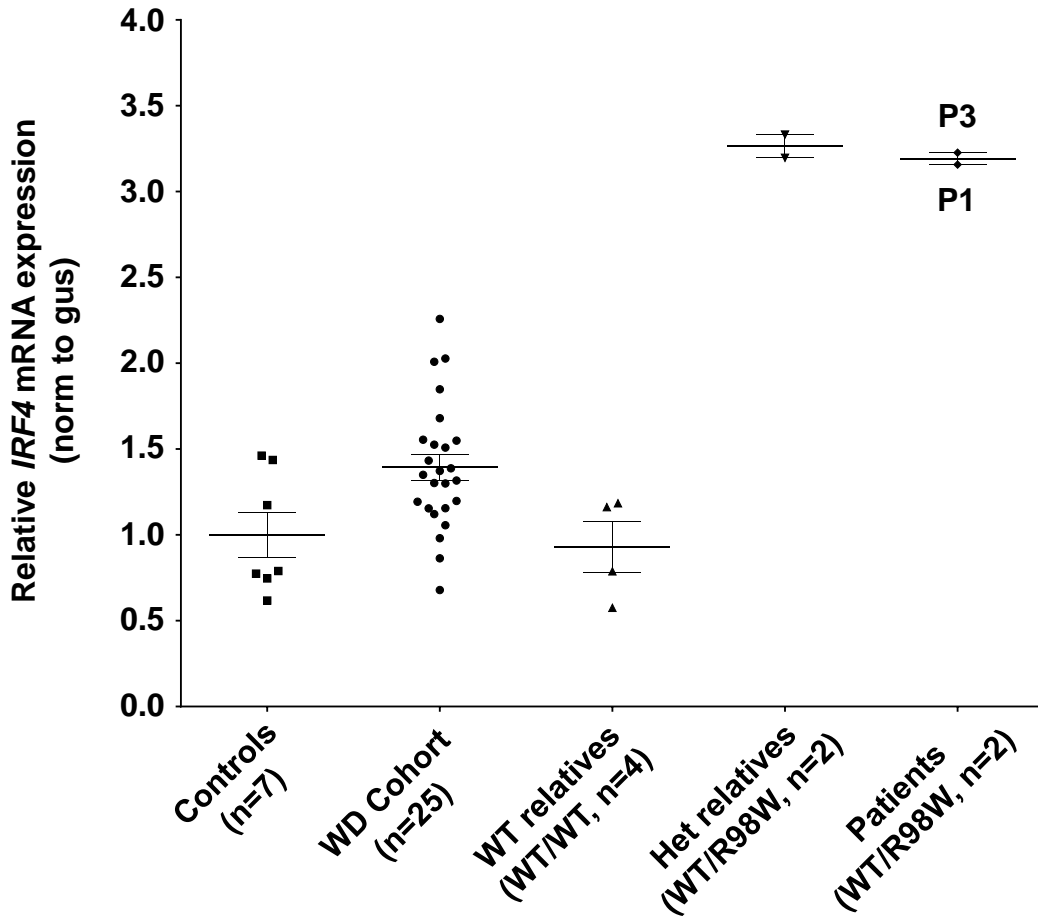

**B**

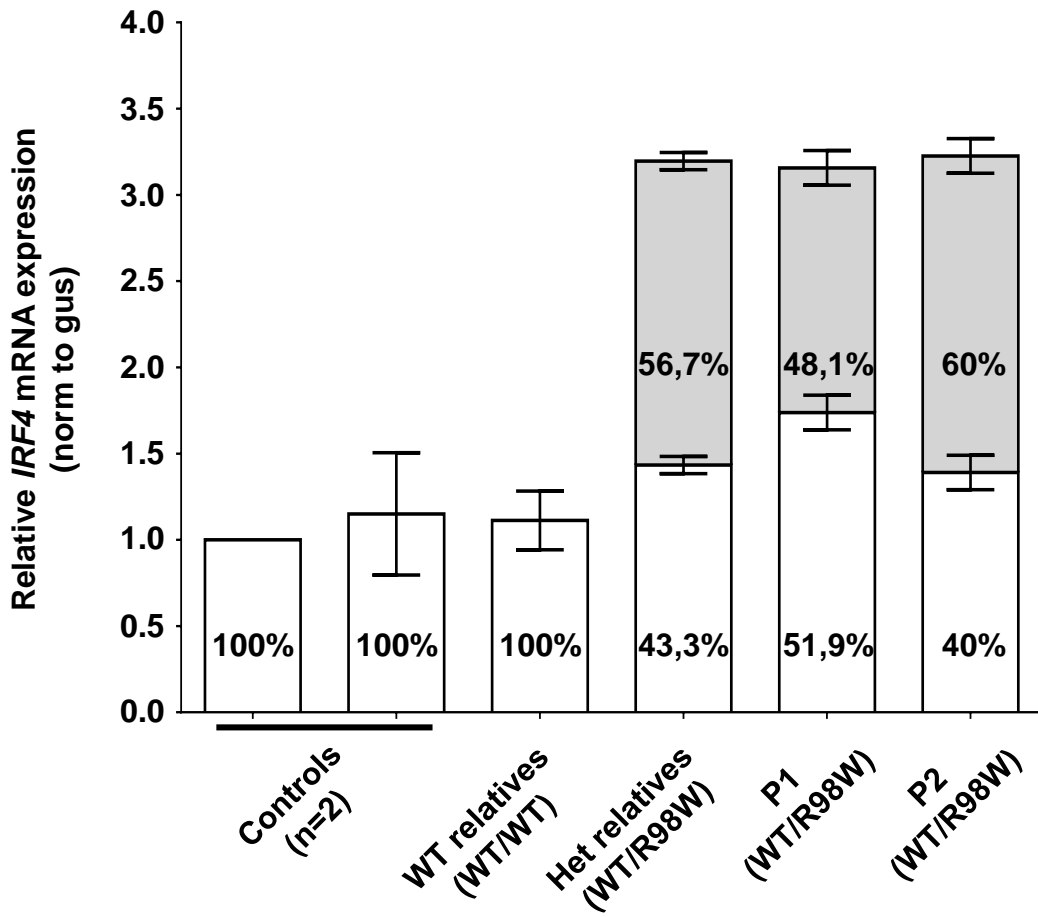

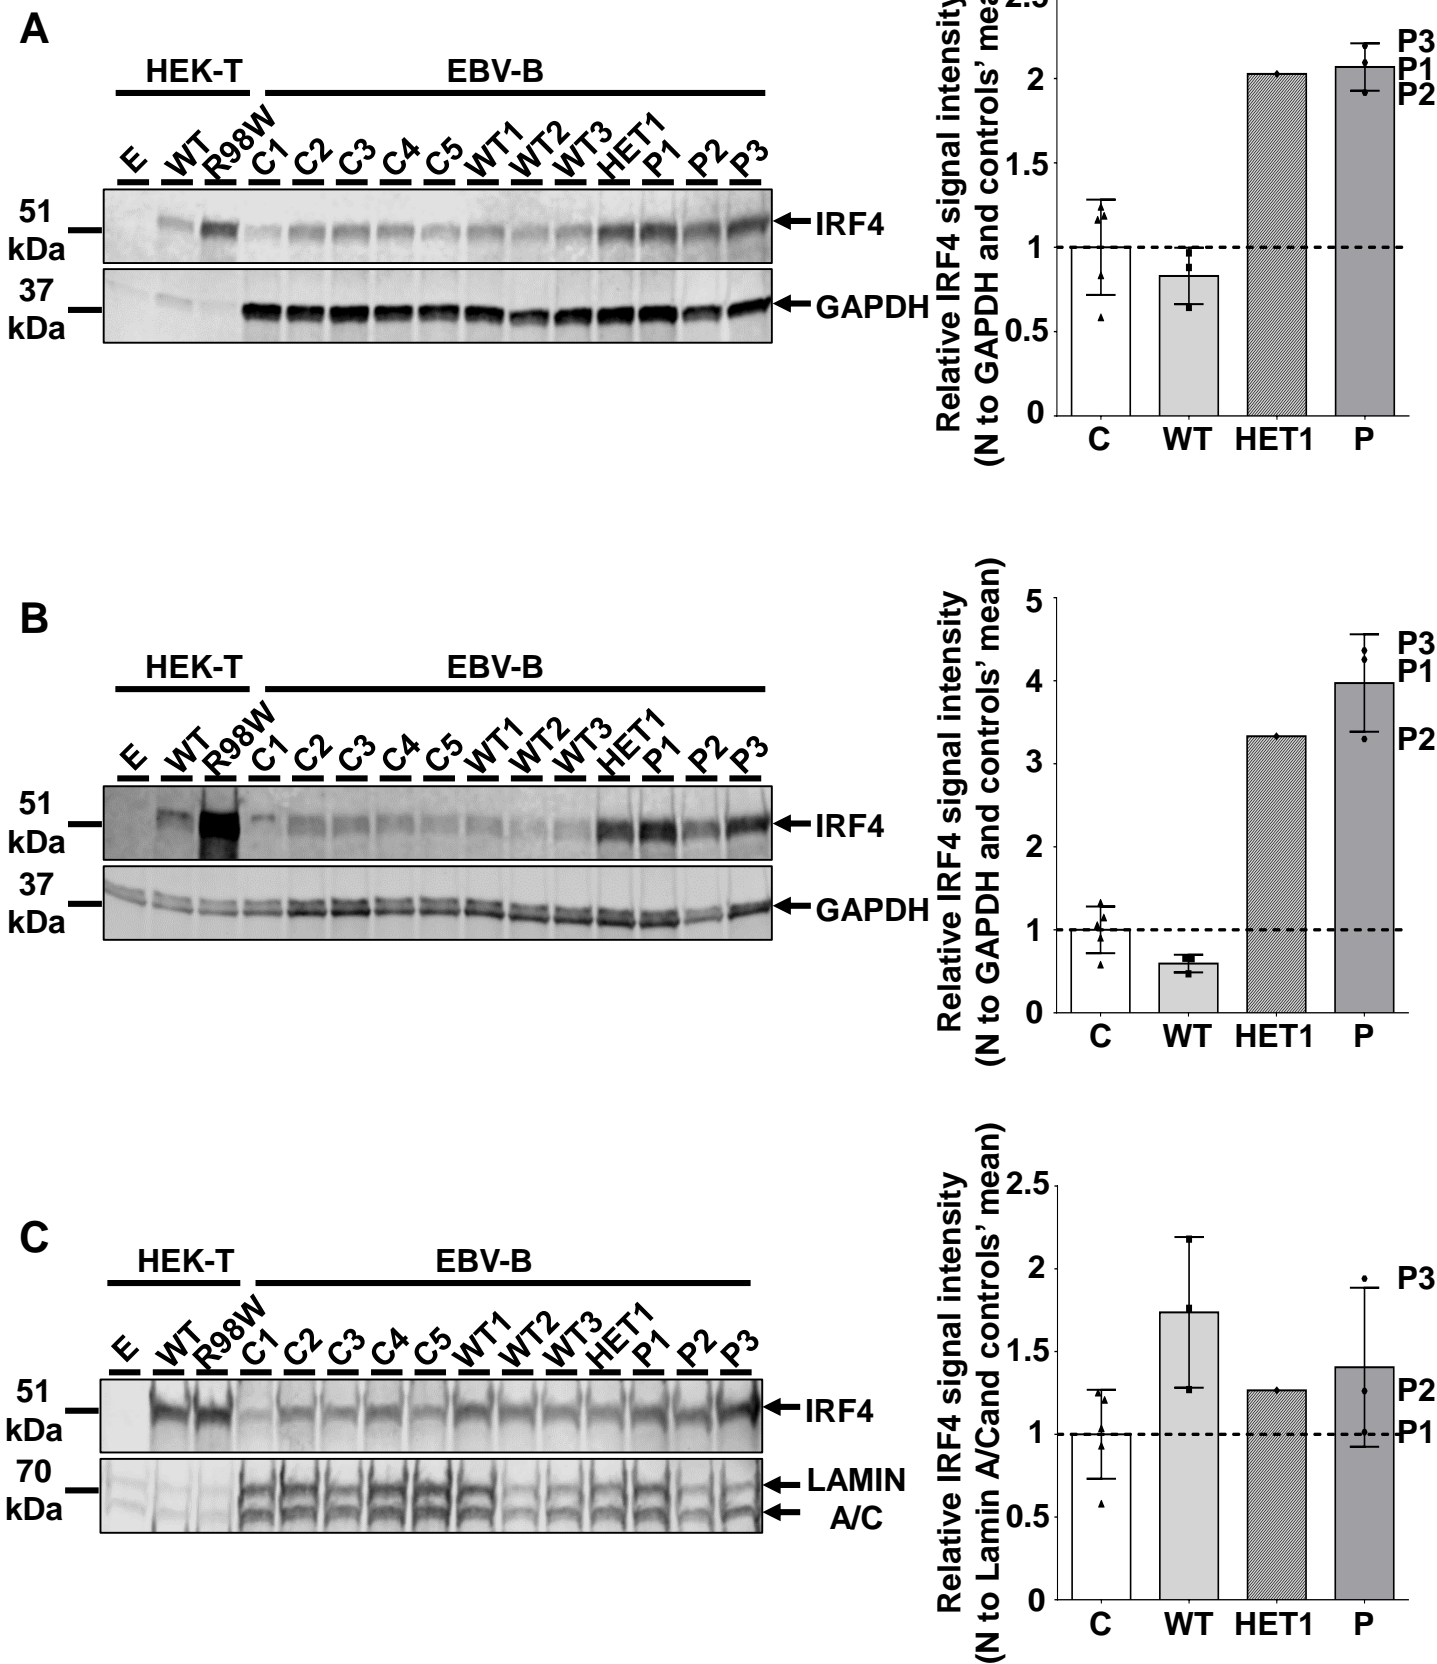

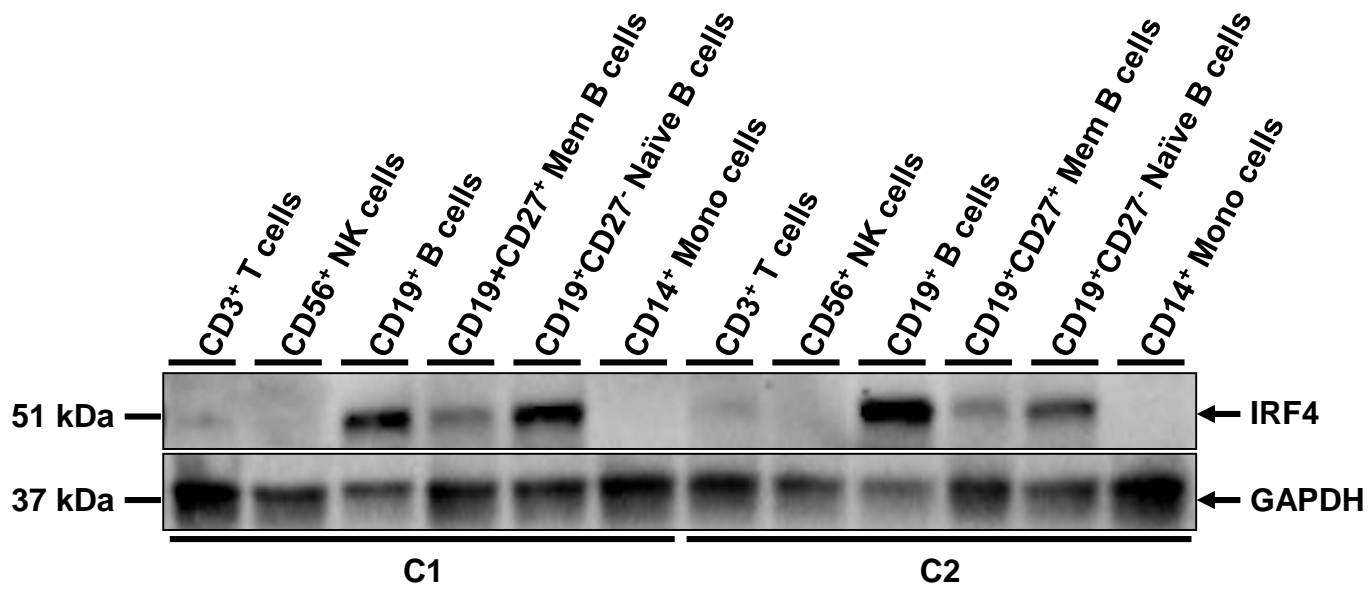

**A**

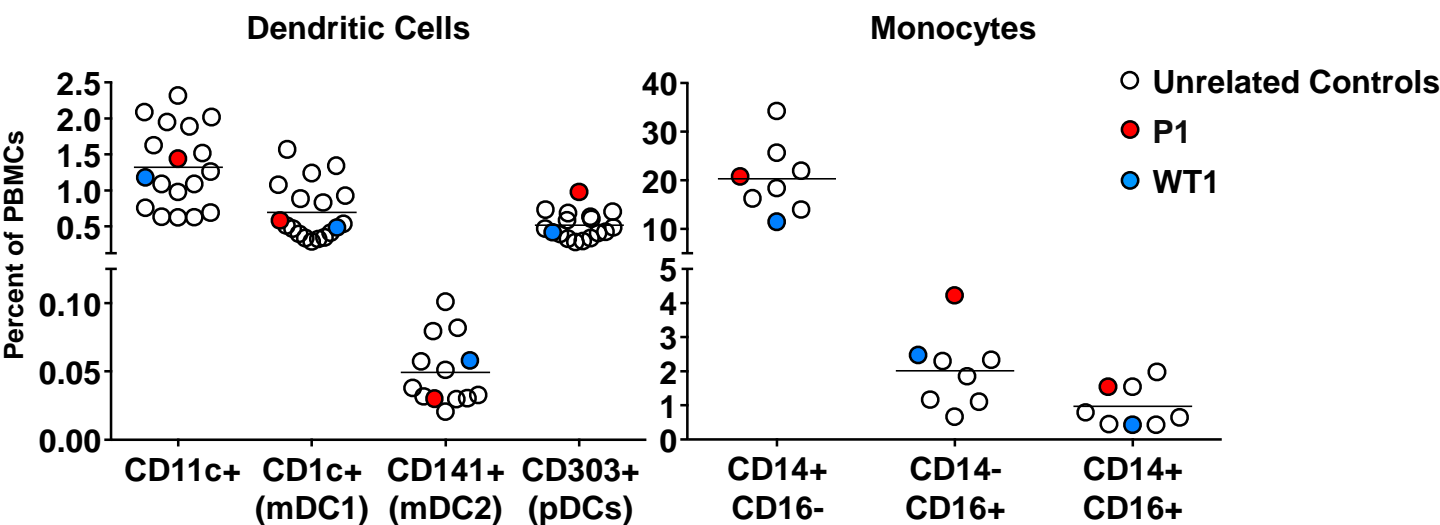

**B**

Gating Strategy

| Population            | Characterization                                                                          |
|-----------------------|-------------------------------------------------------------------------------------------|
| mDC1                  | HLA-DR+, CD14-, CD16-, Lin (CD3, CD15, CD19, CD56, NKp46)-, CD11c+, CD141-, <b>CD1c+</b>  |
| mDC2                  | HLA-DR+, CD14-, CD16-, Lin (CD3, CD15, CD19, CD56, NKp46)-, CD11c+, <b>CD141+</b> , CD1c- |
| pDCs                  | HLA-DR+, CD14-, CD16-, Lin (CD3, CD15, CD19, CD56, NKp46)-, <b>CD303+</b>                 |
| CD14+ CD16- Monocytes | HLA-DR+, Lin (CD3, CD15, CD19, CD56, NKp46)-, <b>CD14+</b> , <b>CD16-</b>                 |
| CD14- CD16+ Monocytes | HLA-DR+, Lin (CD3, CD15, CD19, CD56, NKp46)-, <b>CD14-</b> , <b>CD16+</b>                 |
| CD14+ CD16+ Monocytes | HLA-DR+, Lin (CD3, CD15, CD19, CD56, NKp46)-, <b>CD14-</b> , <b>CD16+</b>                 |

A

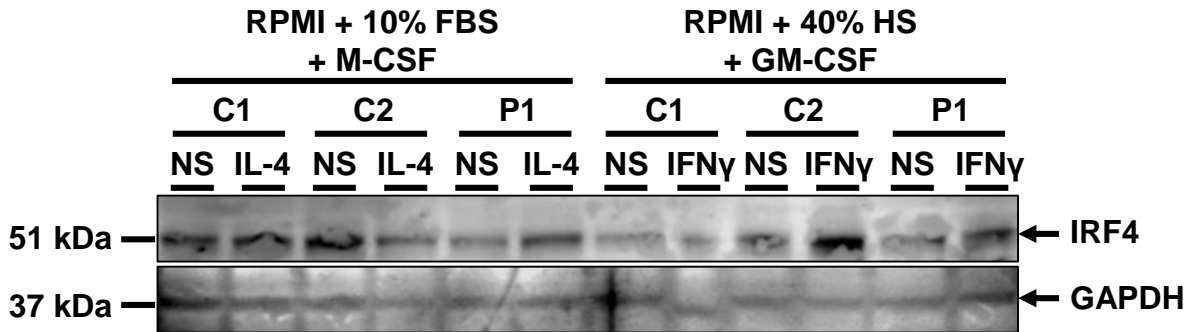

B

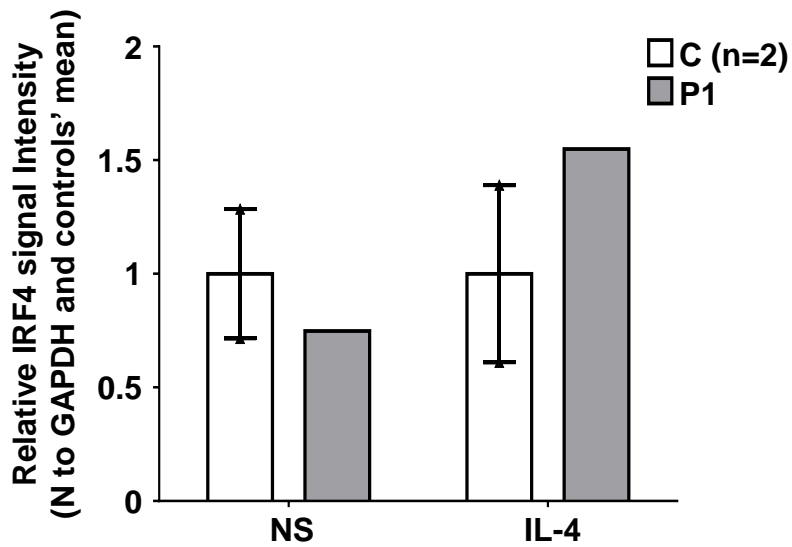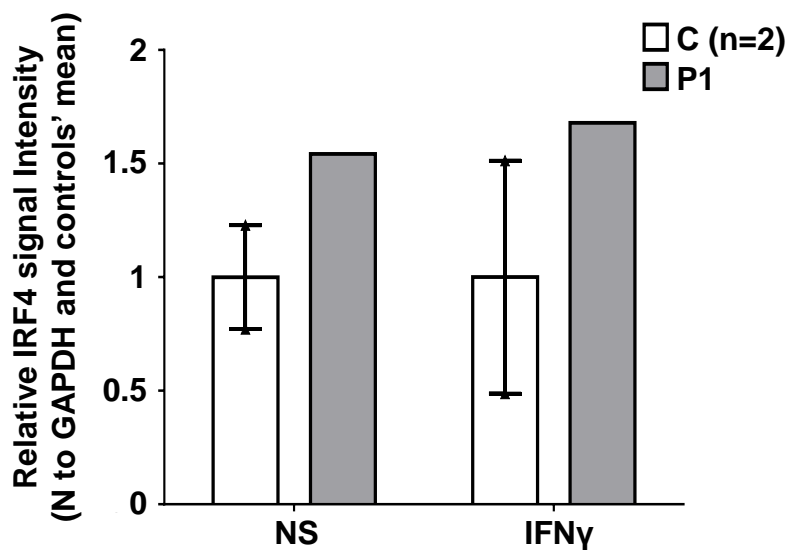

C

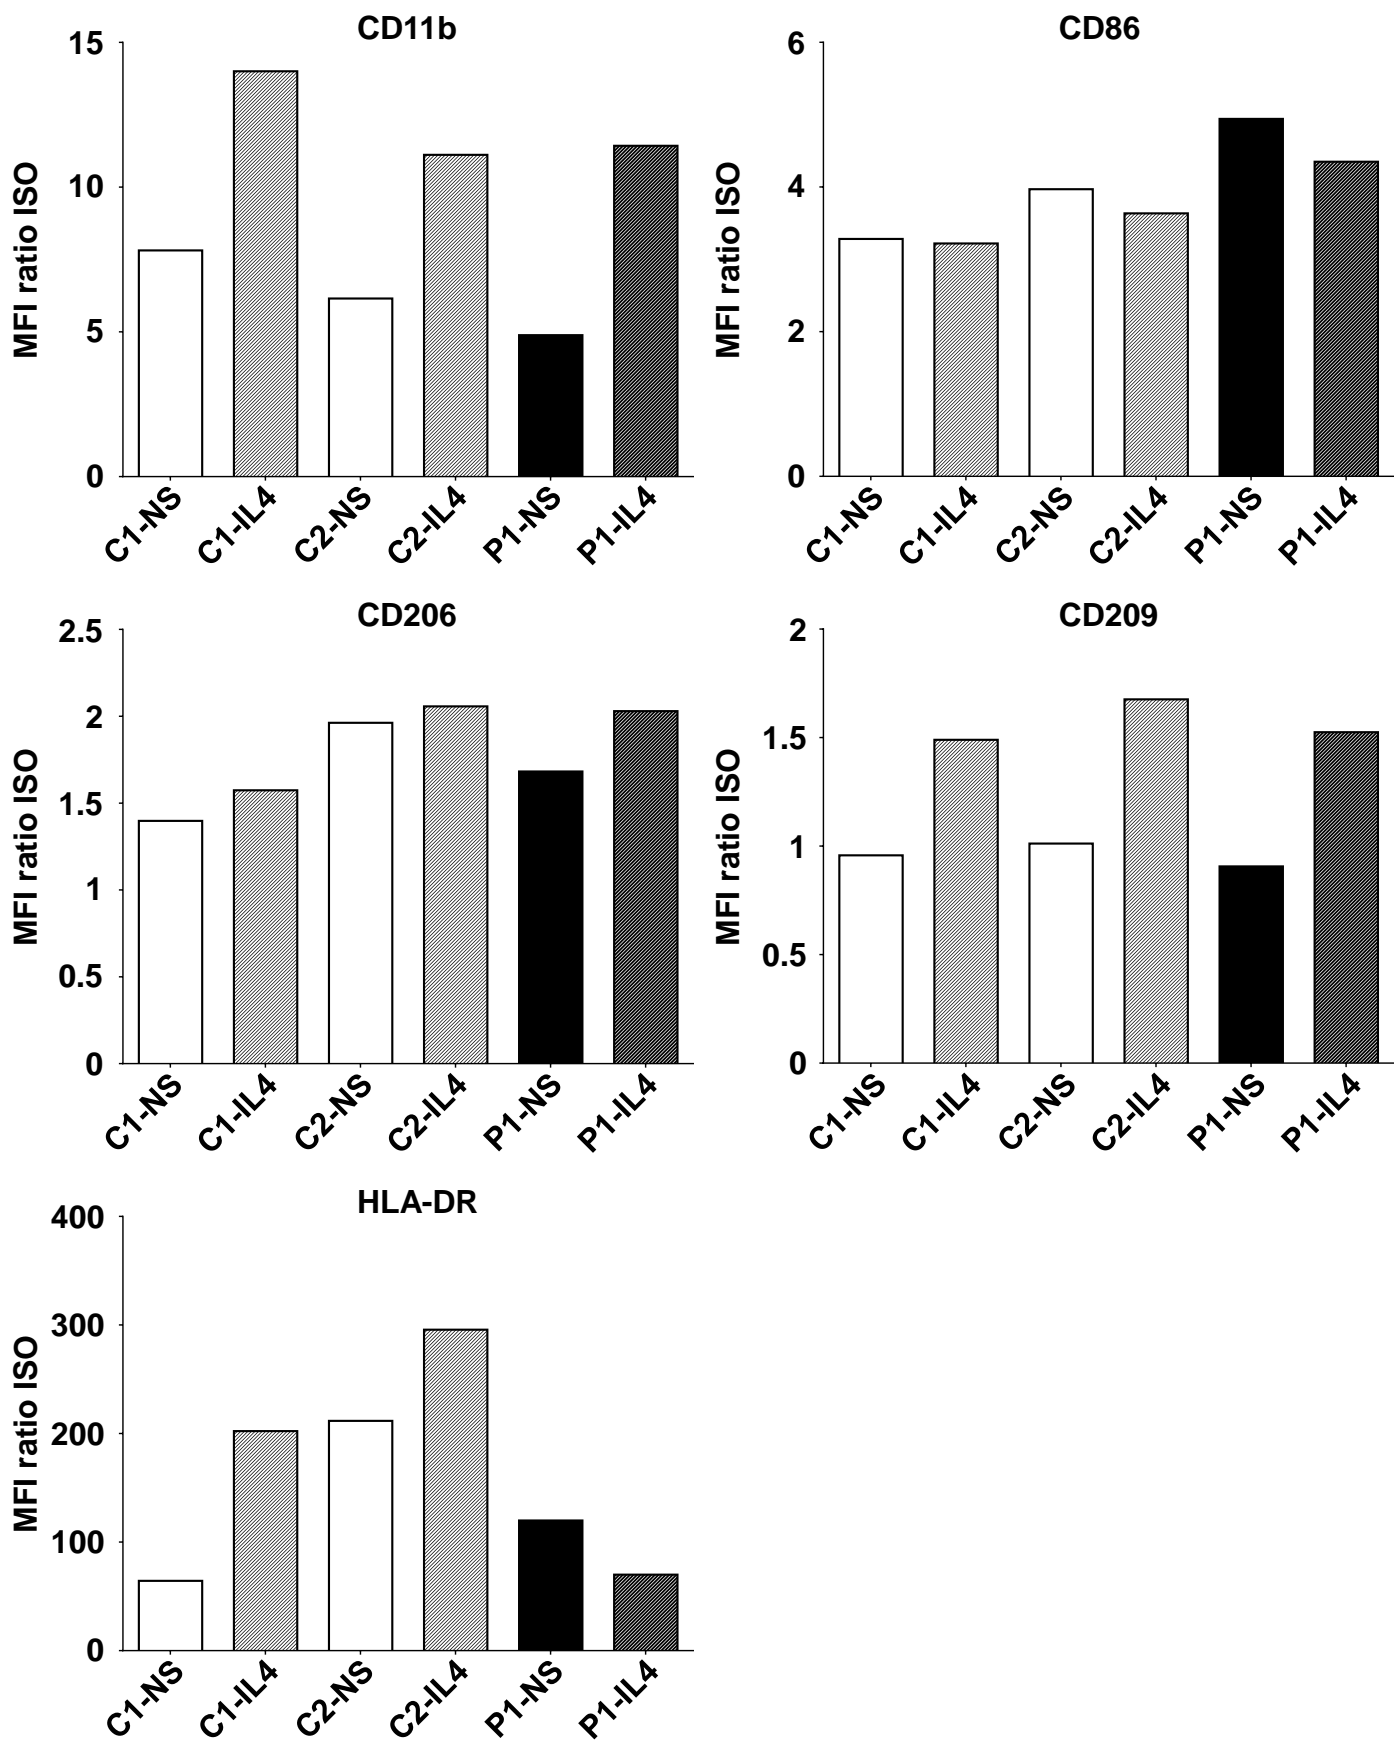

D

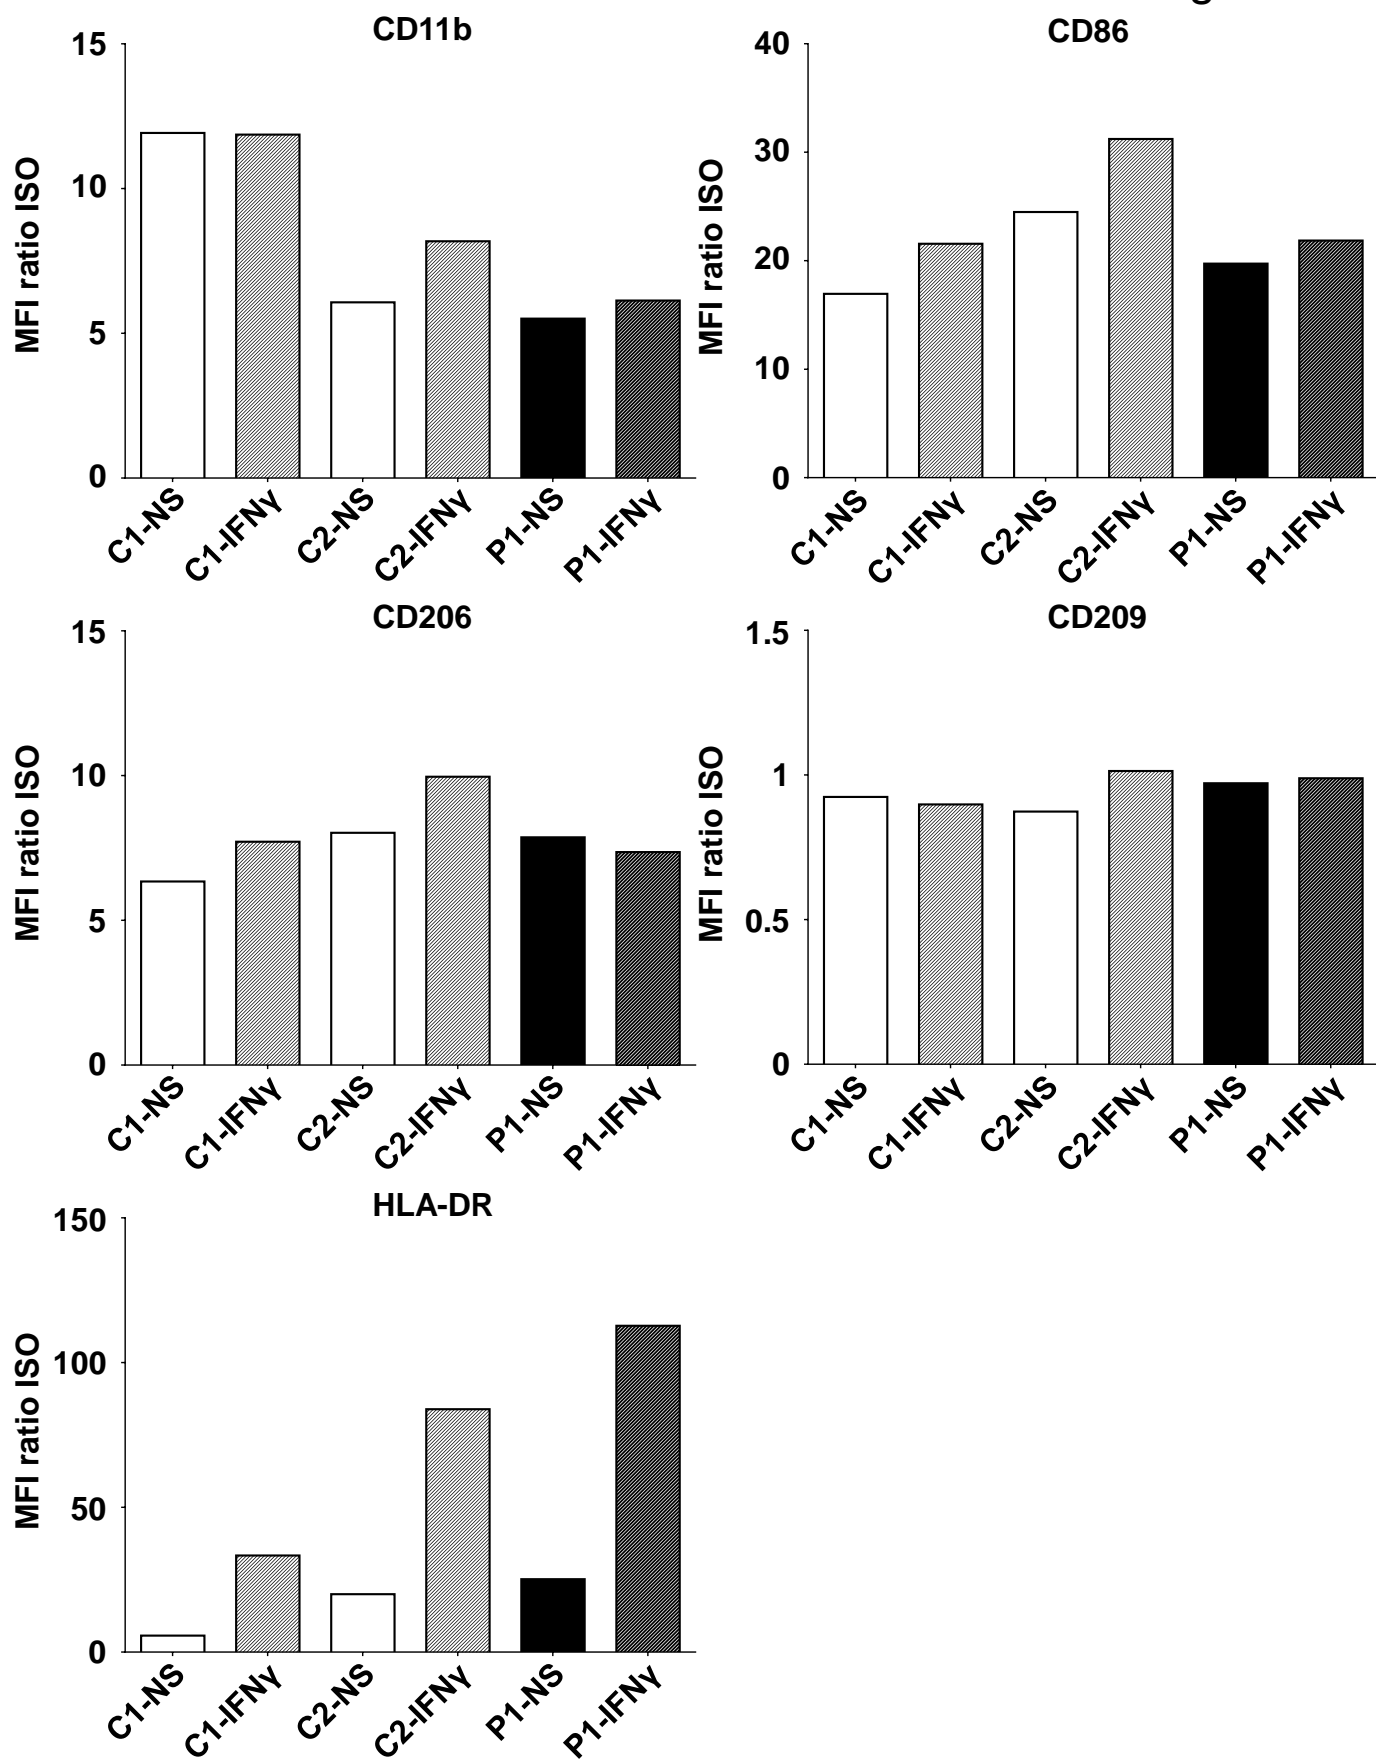



A

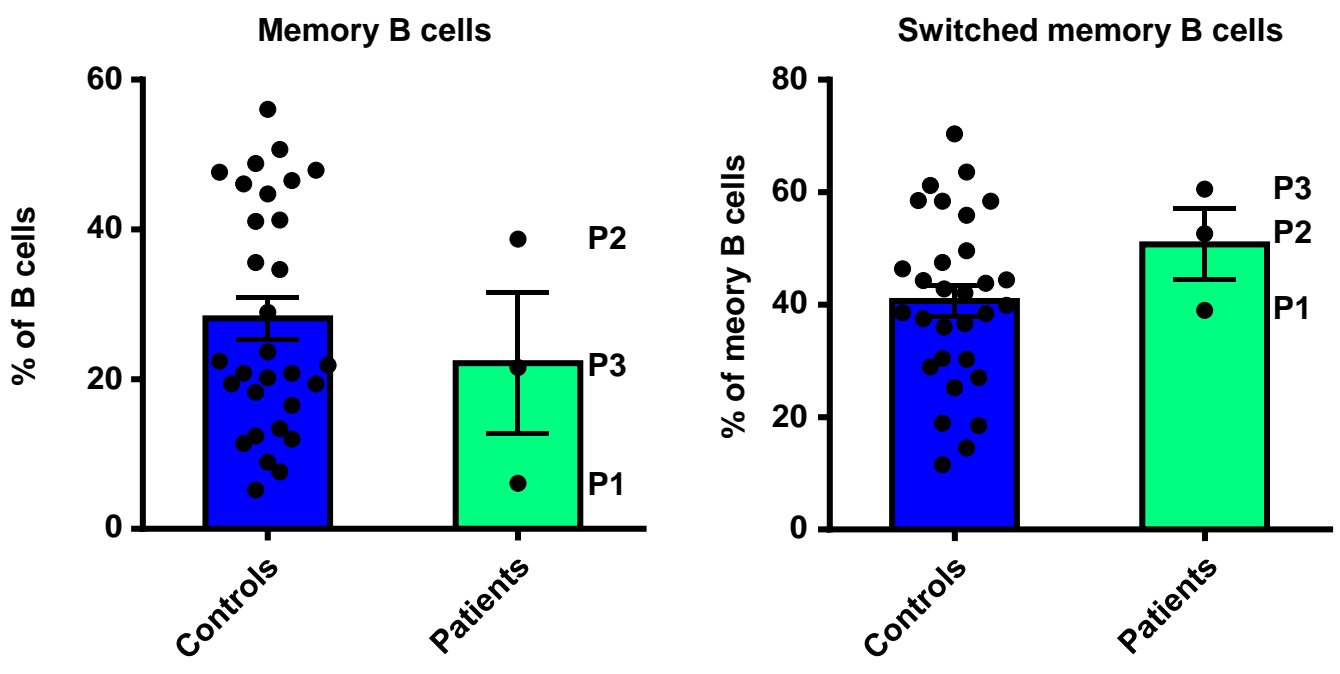

B

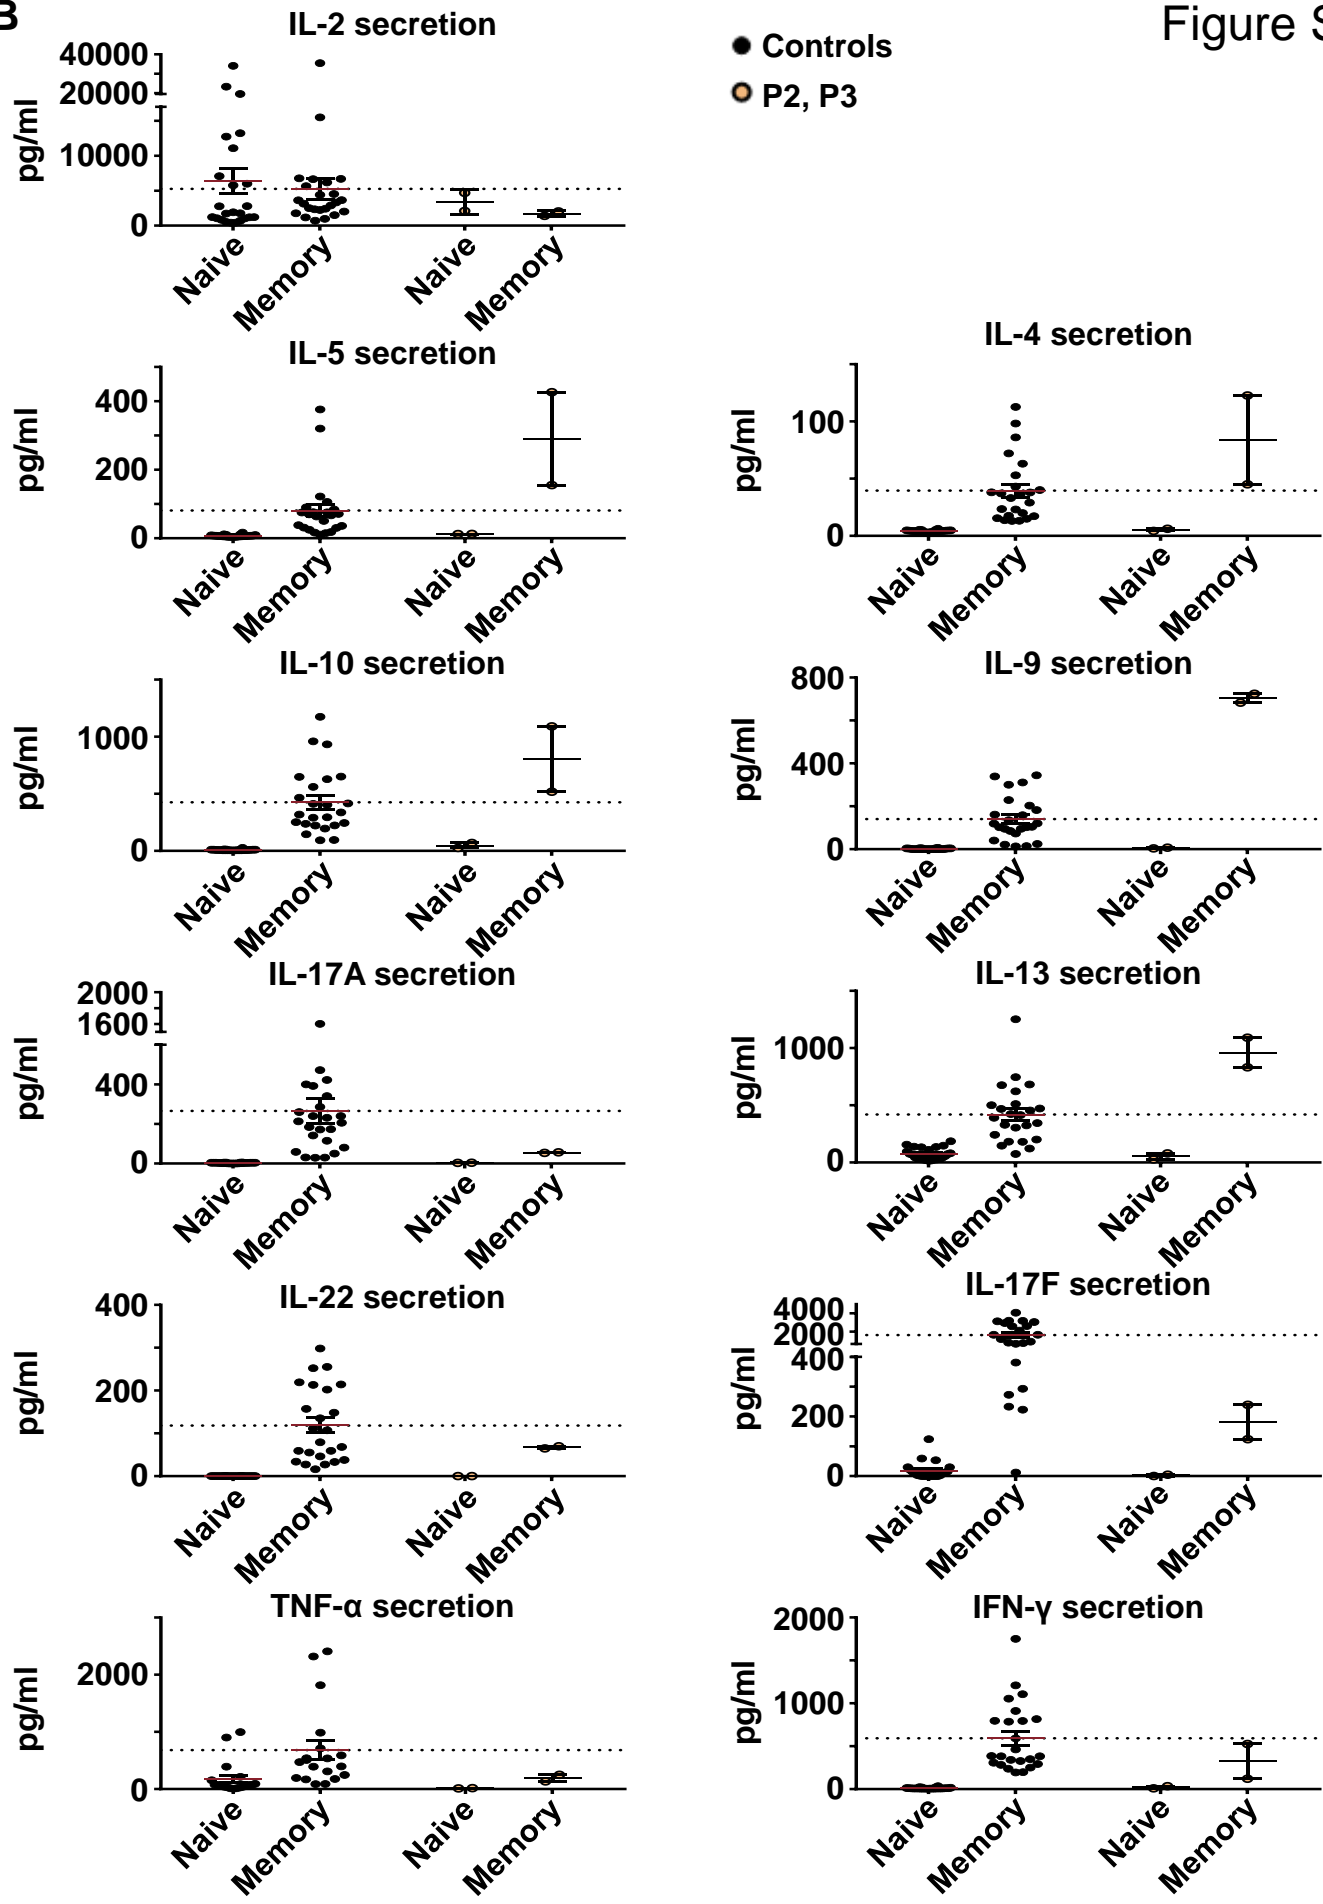

C

● Controls ● P2, P3

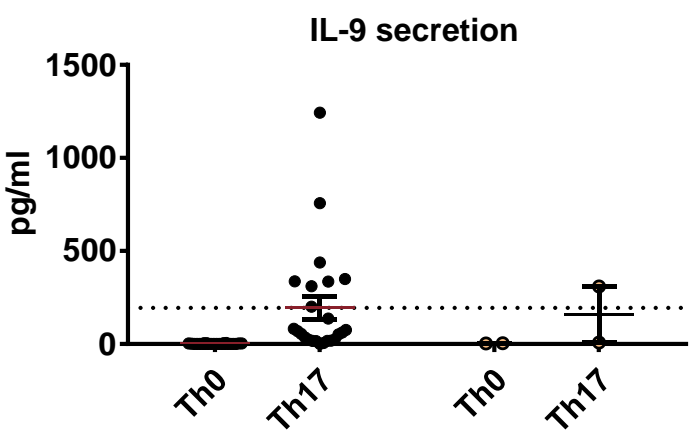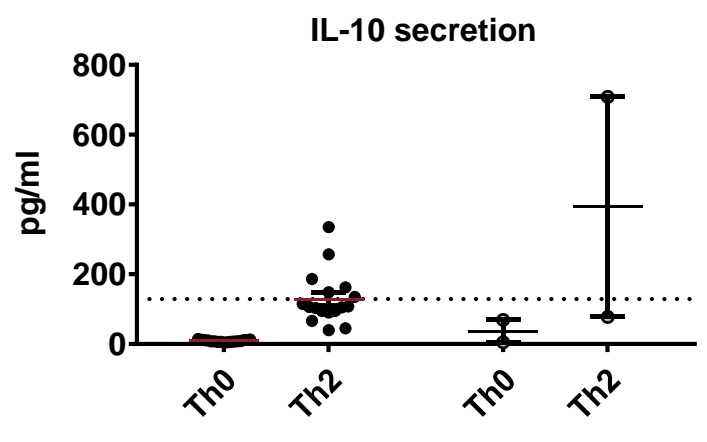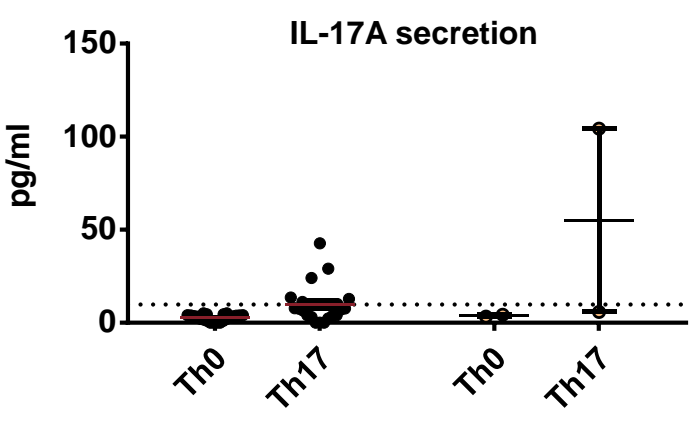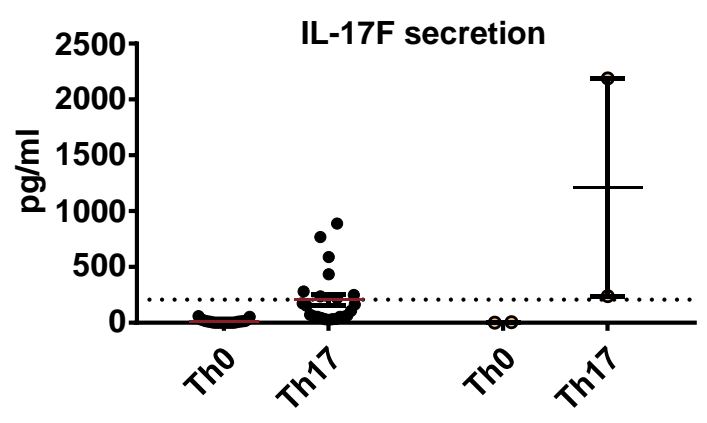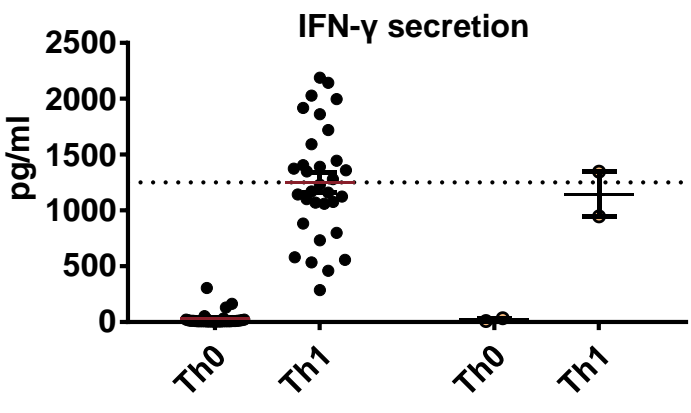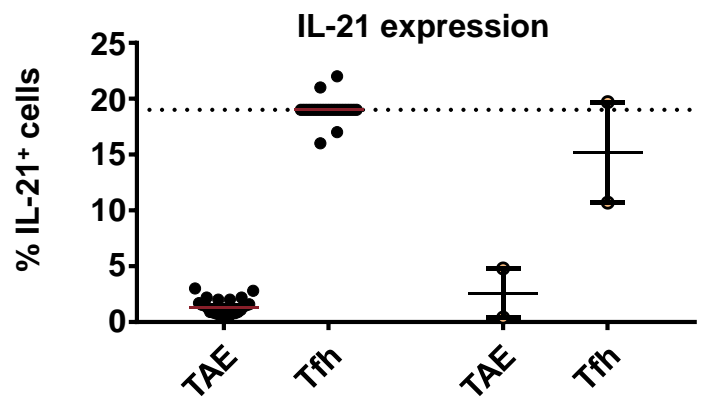

1 **Figure legends**

2

3 **Figure 1. Autosomal dominant IRF4 deficiency. A.** Pedigree of the kindred with allele  
4 segregation. Generations are designated by a Roman numeral (I, II, III, IV, V and VI), and each  
5 individual by an Arabic numeral (from left to right). Each symbol is divided into two parts: the  
6 upper part indicates the clinical status for WD (black: affected, white: healthy), the lower part  
7 indicates whether Tw was identified by PCR (in saliva, blood, feces or joint fluid) or by PAS  
8 staining on bowel biopsy specimens (gray: Tw-positive, white: Tw-negative, “?”: not tested).  
9 Whipple’s disease patients are indicated as P1, P2, P3, and P4; the proband is indicated with an  
10 arrow. Genotype status and age (for *IRF4*-heterozygous individuals) are reported below  
11 symbols. Individuals whose genetic status could not be evaluated are indicated by the symbol  
12 “E?”. **B.** Schematic representation of the IRF4 protein showing the DNA-binding domain  
13 (DBD), P-rich domain, activation domain,  $\alpha$ -helical domain, Q-rich domain, IFR association  
14 domain (IAD) and auto-inhibitory domain. The R98W substitution is indicated in red. **C.**  
15 Electropherogram of *IRF4* genomic DNA sequences from a healthy control (C) and the patients  
16 (P1, P2, P3, P4). The R98W IRF4 mutation is caused by the replacement of an arginine with a  
17 tryptophan residue in position 98 (exon 3, c.292 C>T). Corresponding amino acids are  
18 represented above each electropherogram. **D.** Alignment of the R98W amino acid in the DBD  
19 domain of IRF4 in humans and 11 other animal species. R98 is indicated in red.

20

21 **Figure 2. Molecular characterization of the R98W IRF4 mutation (loss of DNA binding).**

22 **A.** HEK293-T cells were transfected with an empty pcDNA3.1 plasmid (E) or with pcDNA3.1  
23 plasmids carrying wild-type (WT) *IRF4*, R98W or R98A-C99A *IRF4* mutant alleles. Total cell  
24 extracts were subjected to western blotting; the upper panel shows IRF4 levels and the lower  
25 panel shows GAPDH levels, used as a loading control. The results shown are representative of

1 three independent experiments. **B.** (upper panel) HEK293-T cells were transfected with an  
2 empty pcDNA3.1 plasmid (E) or with pcDNA3.1 plasmids carrying the wild-type *IRF4* (WT)  
3 or R98W *IRF4* mutant alleles. Total cell (1), cytoplasmic (2) and nuclear (3) extracts were  
4 subjected to western blotting. Lamin A/C and GAPDH were used as loading controls. (lower  
5 panel) IRF4 signal intensity for R98W-transfected cells and WT-transfected cells, in various  
6 cell compartments (total, cytoplasmic and nuclear), normalized against the GAPDH signal, as  
7 shown by western blotting. The results shown are representative of three independent  
8 experiments. **C.** Luciferase activity of HEK293-T cells cotransfected with an (*ISRE*)<sub>3</sub> reporter  
9 plasmid plus the pcDNA3.1 empty vector (E) and a plasmid encoding WT or R98W or  
10 R98A/C99A mutants. Results are shown, as fold induction of activity relative to E-transfected  
11 cells. The red dotted line indicates mean activity for E-transfected cells. The mean and standard  
12 error of three experiments are shown. **D.** Electrophoretic mobility shift assay (EMSA) of  
13 nuclear extracts of HEK293-T cells transfected with E, WT or R98W plasmids. Extracts were  
14 incubated with a <sup>32</sup>P-labeled *ISRE* probe. Extracts were incubated with specific anti-IRF4  
15 antibody (S) to detect DNA-protein complex supershift, with isotype antibody (I) to  
16 demonstrate the specificity of the complex, and with no antibody (-), as a control. The results  
17 shown are representative of three independent experiments. **E.** EMSA of nuclear extracts of  
18 HEK293-T cells transfected with E, PU.1, WT, R98W, or cotransfected with PU.1 and WT or  
19 PU.1 and R98W plasmids. Extracts were incubated with a <sup>32</sup>P-labeled λB probe (EICE).  
20 Extracts were incubated with specific anti-IRF4 antibody (S) to detect DNA-protein complex  
21 supershift, with isotype antibody (I) to demonstrate the IRF4 specificity of the complex and  
22 with no antibody (-), as a control. Experiments in the presence of excess of non-radioactive  
23 probe (cold probe) demonstrated the probe specificity of the complexes. The results shown are  
24 representative of three independent experiments.

25

1 **Figure 3. IRF4 protein levels in CD4<sup>+</sup> T cells.**

2 **A.-C.** (Left) Total-cell (A), cytoplasmic (B) and nuclear (C) extracts from CD4<sup>+</sup> T cells from  
3 four unrelated controls (C1 to C4) and two patients (P1 and P3) stimulated with  
4 CD2/CD3/CD28-coated beads (Stim) or left unstimulated (NS). Protein extracts from HEK293-  
5 T cells transfected with E or WT plasmids were used as controls for the specific band  
6 corresponding to IRF4. (Right) Representation of IRF4 signal intensity for each individual  
7 relative to the mean signal for unrelated controls ( $n=4$ ) obtained by western blotting (Supp.  
8 Figure 8 A-C left) normalized against the GAPDH signal (total, cytoplasmic extracts) or the  
9 laminin A/C signal (nuclear extracts).

10

11 **Figure 4. Overall transcriptional responsiveness of PBMCs following *in vitro* exposure to**  
12 **Tw and BCG and pathway activity analysis for genes responsive to BCG exposure. A.**

13 The overall responsiveness of individual subjects following stimulation with BCG and Tw,  
14 relative to non-stimulated conditions (along the horizontal axis) is shown as a heatmap. Subjects  
15 were grouped by unsupervised hierarchical clustering. **B.** Enriched canonical pathways were  
16 ranked according to differences in mean activation  $z$ -score between genotypes (homozygous  
17 vs. heterozygous). The activation  $z$ -scores for each individual and pathway are shown as heat  
18 maps. Pathways predicted to be activated are depicted in orange, pathways predicted to be  
19 inhibited are depicted in blue. A lack of prediction concerning activation is depicted in white.  
20 Individuals are presented in columns, pathways in rows. The pathways are ranked from most  
21 different between genotypes (at the top of the list) to least different (at the bottom). The  
22 differences in mean activation  $z$ -scores between homozygous and heterozygous individuals for  
23 each pathway are depicted as bars to the right of the heat maps (the direction of difference is  
24 not shown). The Ingenuity Pathway Analysis (IPA) tool was used to generate a list of the most  
25 significant canonical pathways and their respective activation  $z$ -scores.

1           **Supplementary Figures legends**

2

3           **Supplementary Figure 1. Genome-wide linkage and whole-exome sequencing analyses. A.**

4           Genome wide linkage analysis was performed by combining Genome-wide array and whole-  
5           exome sequencing (WES) data assuming an autosomal dominant (AD) mode of inheritance.

6           LOD (logarithm of odds) scores are shown for the four patients considered together. The  
7           maximum expected LOD score is 1.95, based on an AD model with incomplete penetrance.

8           *IRF4* is located within a linkage region (LOD=1.94) on chromosome 6 (indicated by a black  
9           arrow). **B.** A refined analysis of WES data identified *IRF4* as the only protein-coding gene

10          carrying a rare heterozygous mutation common to P1, P2, P3 and P4 within the linkage regions.

11

12          **Supplementary Figure 2. Analysis *in silico* of *IRF4* variants. A.** Minor allele frequency and

13          combined annotation–dependent depletion score (CADD) of all coding variants reported in  
14          public database (GnomAD) (<http://gnomad.broadinstitute.org>) and in-house (HGID) databases.

15          The dotted line corresponds to the mutation significance cutoff (MSC) with 95% confidence  
16          interval. The variants studied *in vitro* here are shown in red, in bold typeface. The R98W variant

17          is represented by a blue square.

18

19          **Supplementary Figure 3. List of variants and strength of purifying selection on *IRF4*. A.**

20          Genome-wide distribution of the strength of purifying selection, estimated by the *f* parameter  
21          (53), acting on 14,993 human genes. *IRF4* is at the 9.4<sup>th</sup> percentile of the distribution, indicating

22          that it is more constrained than most human genes. **B.** List of *IRF4* missense and in-frame  
23          deletion variants reported in a public database (GnomAD) and studied *in vitro* here. **C.** List of

24          *IRF4* missense and in-frame deletion variants found in the HGID database and studied *in vitro*  
25          here.

1

2 **Supplementary Figure 4. Functional activity of IRF4.**

3 Luciferase activity of HEK293-T cells cotransfected with an (*ISRE*)<sub>3</sub> reporter plasmid plus E  
4 and WT or various amounts of R98W or R98A/C99A plasmids. Results are showed as fold  
5 induction of activity relative to E-transfected cells. The results shown are the mean ± S.D. of  
6 three independent experiments.

7

8 **Supplementary Figure 5. Protein levels and functional impact of IRF4 variants.**

9 **A.-B.** HEK293-T cells were transfected with E or WT, R98W or several *IRF4* variants reported  
10 in a public database (**A**, see Figure S3B) or in the HGID database (**B**, see Figure S3C). Total  
11 cell extracts were subjected to western blotting; the upper panel shows IRF4 levels and the  
12 lower panel shows GAPDH levels, used as a loading control. The results shown are  
13 representative of three independent experiments. **C.-D.** Luciferase activity of HEK293-T cells  
14 cotransfected with an (*ISRE*)<sub>3</sub> reporter plasmid plus E and plasmids containing WT, R98W or  
15 several IRF4 variants reported in public databases (**C**, see Figure S3B) or in the HGID database  
16 (**D**, see Figure S3C). Results are shown as fold induction of activity relative to E-transfected  
17 cells. The red dotted line indicates the mean fold induction in E-transfected cells. The results  
18 shown are the mean ± SD of three independent experiments.

19

20 **Supplementary Figure 6. IRF4 mRNA levels in EBV-B cells.**

21 **A.** Total RNA extracted from controls (n=7), patients diagnosed with Whipple's disease (n=25)  
22 not related to this kindred, healthy homozygous WT relatives (n=4), patients with monoallelic  
23 *IRF4* mutations (n=2) and asymptomatic heterozygous relatives with monoallelic *IRF4*  
24 mutations (n=2) was subjected to RT-qPCR for total *IRF4*. Data are displayed as 2- $\Delta\Delta C_t$  after  
25 normalization according to endogenous GUS control gene expression ( $\Delta C_t$ ) and the mean of



1 controls ( $\Delta\Delta C_t$ ). The results shown are the mean  $\pm$  SD of three independent experiments. **B.**  
2 The *IRF4* mRNA levels reported in Figure S7A are represented on histograms; the percentage  
3 within each bar is the deduced frequency of each mRNA obtained by the TA-cloning of cDNA  
4 generated from EBV-B cells from controls ( $n=2$ ), healthy homozygous WT relatives ( $n=1$ ),  
5 patients with monoallelic *IRF4* mutations ( $n=2$ ) and asymptomatic heterozygous relatives with  
6 monoallelic *IRF4* mutations ( $n=1$ ).

7

### 8 **Supplementary Figure 7. IRF4 protein levels in EBV-B cells.**

9 **A.-C.** (Left) Total cell (A), cytoplasmic (B) and nuclear (C) extracts (b) from five healthy  
10 controls (C1 to C5), three homozygous WT relatives (WT1, WT2, WT3), three patients (P1 to  
11 P3) and one asymptomatic heterozygous relative from the kindred (HET1). Protein extracts  
12 from HEK293-T cells transfected with E, WT or R98W plasmids were used as controls for the  
13 specific band corresponding to IRF4. (Right) Representation of IRF4 signal intensity for each  
14 individual relative to the mean signal for unrelated controls ( $n=5$ ) obtained by WB and  
15 represented by black dotted lines (Supp. Figure A left) normalized against the GAPDH signal  
16 (total, cytoplasmic extracts) or the lamin A/C signal (nuclear extracts). The results shown are  
17 representative of two independent experiments.

18

### 19 **Supplementary Figure 8. IRF4 protein levels in PBMC subpopulations.**

20 Total cell extracts from PBMC subpopulations ( $CD3^+$  T cells,  $CD56^+$  NK cells,  $CD19^+$  B cells,  
21  $CD19^+CD27^+$  memory B cells,  $CD19^+CD27^-$  naive B cells,  $CD14^+$  monocytes) from two  
22 unrelated healthy controls were subjected to western blotting. The upper panel shows IRF4  
23 levels and the lower panel shows GAPDH levels, used as a loading control. The results shown  
24 are representative of two independent experiments.

25

1 **Supplementary Figure 9. Percentage of dendritic cells and monocyte subtypes within total**  
2 **PBMCs. A.** Percentage of CD11c<sup>+</sup>, myeloid dendritic cells (mDC1 and mDC2) and  
3 plasmacytoid dendritic cells (pDCs) (left), and monocyte subtypes (right) among total PBMCs  
4 from unrelated controls, a patient (P1) and a homozygous WT relative (WT1). **B.** Gating  
5 strategy to define the dendritic cell and monocyte subtypes.

6  
7 **Supplementary Figure 10. IRF4 levels in the patients' monocyte-derived macrophages. A.**  
8 IRF4 protein levels, as determined by western blotting on total cell extracts from M2-like (left  
9 panel) or M1-like (right panel) monocyte-derived macrophages (MDMs) from two unrelated  
10 healthy controls (C1 and C2) and P1, either left non-stimulated (NS) or stimulated with IL-4  
11 (for M2-like MDMs) or IFN- $\gamma$  (for M1-like MDMs). **B.** IRF4 signal intensity for each  
12 individual relative to the mean signal for controls on western blots. **C.-D.** CD11b, CD86,  
13 CD206, CD209 and HLA-DR mean fluorescence intensity (MFI) for M2-MDM (C) and M1-  
14 MDM (D) from P1 and two healthy unrelated controls (C1 and C2), either left non-stimulated  
15 (NS) or stimulated with IL-4 (for M2-like MDMs) or IFN- $\gamma$  (for M1-like MDMs).

16  
17 **Supplementary Figure 11. Percentage of memory B cells, *in vitro* differentiation of CD4<sup>+</sup>**  
18 **T cells and *ex vivo* cytokine production by CD4<sup>+</sup> memory T cells. A.** PBMCs from unrelated  
19 controls and patients (P1, P2 and P3) were stained with antibodies against CD20, CD10 and  
20 CD27, IgM, IgG or IgA. Percentages of memory B cells (CD20<sup>+</sup> CD10<sup>-</sup> CD27<sup>+</sup>) were  
21 determined, and the proportion of memory B cells that had undergone class switching to express  
22 IgG or IgA was then calculated. No significant differences were observed between unrelated  
23 controls and patients. **B.** Naïve and memory CD4<sup>+</sup> T cells from unrelated controls and patients  
24 (P2 and P3) were purified by sorting and cultured with TAE beads. The secretion of IL-2, IL-  
25 4, IL-5, IL-9, IL-10, IL-13, IL-17A, IL-17F, IL-22, IFN- $\gamma$  and TNF- $\alpha$  was measured five days

1 later. No significant differences were observed between unrelated controls and patients. **C.**  
2 Naïve CD4<sup>+</sup> T cells from unrelated controls and patients (P2 and P3) were stimulated with TAE  
3 beads alone or under Th1, Th2, Th17 or Tfh polarizing conditions. The production of IL-10,  
4 IL-21, IL-17A, IL-17F and IFN- $\gamma$  was measured five days later, in the corresponding polarizing  
5 conditions. No significant differences were observed (as in B) between unrelated controls and  
6 patients.

**Supplementary Table 1. Kindred information summary.**

For each subject, Tw carriage status, *IRF4* genotype, clinical status and date of birth (DOB) are reported. NA: not available; Pos: positive; Neg: negative; Tw: *Tropheryma whipplei*; WD: Whipple's disease; E?: genotype not assessed.

| ID         | TW carriage (PCR) |        |             | IRF4 genotype | Clinical status | DOB        |
|------------|-------------------|--------|-------------|---------------|-----------------|------------|
|            | Feces             | Saliva | Joint fluid |               |                 |            |
| III.4 (P3) | Pos. then Neg.    | Neg.   | NA          | WT/R98W       | Classical WD    | 21/05/1925 |
| III.5      | Neg.              | Neg.   | NA          | WT/WT         | Healthy         | 14/08/1922 |
| III.6      | NA                | Pos.   | NA          | WT/R98W       | Healthy         | 01/04/1935 |
| IV.1 (P4)  | Neg.              | Neg.   | NA          | WT/R98W       | Althralgia WD   | 14/04/1947 |
| IV.2       | Neg.              | Neg.   | NA          | WT/WT         | Healthy         | 20/07/1951 |
| IV.3 (P2)  | Pos.              | Pos.   | NA          | WT/R98W       | Classical WD    | 30/08/1941 |
| IV.4       | Pos.              | Pos.   | NA          | WT/R98W       | Healthy         | 23/07/1955 |
| IV.5       | Neg.              | Neg.   | NA          | WT/R98W       | Healthy         | 06/11/1951 |
| IV.6 (P1)  | Neg.              | Neg.   | Pos.        | WT/R98W       | Althralgia WD   | 17/02/1948 |
| IV.7       | Neg.              | Neg.   | NA          | WT/WT         | Healthy         | 17/02/1948 |
| IV.8       | Neg.              | Neg.   | NA          | WT/WT         | Healthy         | 09/04/1961 |
| IV.9       | NA                | NA     | NA          | WT/R98W       | Healthy         | 26/04/1958 |
| V.1        | Neg.              | Neg.   | NA          | WT/WT         | Healthy         | 13/05/1974 |
| V.2        | Neg.              | Neg.   | NA          | WT/WT         | Healthy         | 07/05/1978 |
| V.3        | Pos.              | Neg.   | NA          | WT/R98W       | Healthy         | 11/09/1965 |
| V.4        | Pos.              | Pos.   | NA          | WT/R98W       | Healthy         | 14/07/1962 |
| V.5        | NA                | NA     | NA          | WT/WT         | Healthy         | 09/08/1969 |
| V.6        | NA                | NA     | NA          | E?            | Healthy         | NA         |
| V.7        | NA                | NA     | NA          | WT/WT         | Healthy         |            |
| V.8        | NA                | NA     | NA          | WT/WT         | Healthy         | 31/08/1994 |
| V.9        | NA                | NA     | NA          | E?            | Healthy         | NA         |
| V.10       | NA                | NA     | NA          | E?            | Healthy         | NA         |
| VI.1       | Neg.              | Neg.   | NA          | WT/WT         | Healthy         | 17/02/2004 |
| VI.2       | Neg.              | Neg.   | NA          | WT/WT         | Healthy         | 21/09/2006 |
| VI.3       | NA                | Neg.   | NA          | WT/WT         | Healthy         | 16/05/2006 |
| VI.4       | Neg.              | Neg.   | NA          | WT/WT         | Healthy         | 29/03/2011 |
| VI.5       | Neg.              | Neg.   | NA          | WT/WT         | Healthy         | 09/08/1996 |
| VI.6       | Pos.              | Neg.   | NA          | WT/R98W       | Healthy         | 04/10/1993 |
| VI.7       | Neg.              | Neg.   | NA          | WT/R98W       | Healthy         | 24/08/2002 |
| VI.8       | NA                | NA     | NA          | E?            | Healthy         | NA         |
| VI.9       | NA                | NA     | NA          | E?            | Healthy         | NA         |

**Supplementary Table 2. Non-synonymous variants within the linkage regions found in WES data from patients.**

| Chr | Pos      | ID          | Ref  | Alt | Function         | MAF     | Gene     |
|-----|----------|-------------|------|-----|------------------|---------|----------|
| 6   | 394896   | NA          | C    | T   | missense         | NA      | IRF4     |
| 11  | 1010694  | rs1128413   | C    | T   | missense         | 0.393   | AP2A2    |
| 11  | 1016609  | rs73403291  | C    | G   | missense         | 0.088   | MUC6     |
| 11  | 1016640  | rs111704427 | G    | A   | missense         | 0.193   | MUC6     |
| 11  | 1016665  | rs77438942  | C    | T   | missense         | 0.449   | MUC6     |
| 11  | 1016704  | rs75826443  | C    | A   | missense         | 0.316   | MUC6     |
| 11  | 1016713  | rs76406481  | T    | C   | missense         | 0.325   | MUC6     |
| 11  | 1016722  | rs144616203 | T    | G   | missense         | 0.093   | MUC6     |
| 11  | 1016724  | rs3208810   | A    | G   | missense         | 0.361   | MUC6     |
| 11  | 1016890  | rs113508205 | G    | A   | missense         | 0.199   | MUC6     |
| 11  | 1016910  | rs113559934 | G    | A   | missense         | 0.362   | MUC6     |
| 11  | 1016914  | rs74632841  | G    | T   | missense         | 0.106   | MUC6     |
| 11  | 1016928  | rs34053383  | C    | G   | missense         | 0.475   | MUC6     |
| 11  | 1016988  | rs72311383  | ATGT | A   | inframe_deletion | 0.073   | MUC6     |
| 11  | 1017035  | NA          | A    | AAT | frameshift       | 0.096   | MUC6     |
| 11  | 1017069  | rs80333708  | G    | A   | missense         | 0.399   | MUC6     |
| 11  | 1017183  | rs34844844  | G    | T   | missense         | 0.444   | MUC6     |
| 11  | 1017220  | rs56238842  | T    | C   | missense         | 0.495   | MUC6     |
| 11  | 1017231  | rs35840539  | A    | G   | missense         | 0.495   | MUC6     |
| 11  | 1017240  | rs62891761  | G    | A   | missense         | 0.464   | MUC6     |
| 11  | 1017294  | rs200241162 | A    | T   | missense         | 0.00437 | MUC6     |
| 11  | 1017302  | rs35330958  | G    | C   | missense         | 0.328   | MUC6     |
| 11  | 1017325  | rs55903826  | A    | C   | missense         | 0.473   | MUC6     |
| 11  | 1017337  | rs76686156  | T    | C   | missense         | 0.328   | MUC6     |
| 11  | 1017338  | rs78943453  | C    | A   | missense         | 0.328   | MUC6     |
| 11  | 1017384  | rs34095361  | G    | C   | missense         | 0.454   | MUC6     |
| 11  | 1017421  | rs35549382  | G    | T   | missense         | 0.246   | MUC6     |
| 11  | 1017858  | rs79583615  | A    | G   | missense         | 0.372   | MUC6     |
| 11  | 1017963  | rs61869008  | G    | A   | missense         | 0.452   | MUC6     |
| 11  | 1017981  | rs61869010  | T    | A   | missense         | 0.453   | MUC6     |
| 11  | 1017988  | rs112579249 | G    | T   | missense         | 0.025   | MUC6     |
| 11  | 1018024  | NA          | C    | G   | missense         | 0.169   | MUC6     |
| 11  | 1018042  | rs200364398 | A    | G   | missense         | 0.173   | MUC6     |
| 11  | 1018048  | rs12787400  | A    | G   | missense         | 0.172   | MUC6     |
| 11  | 1018059  | rs78336072  | C    | T   | missense         | 0.175   | MUC6     |
| 11  | 1018456  | rs79920422  | G    | A   | missense         | 0.484   | MUC6     |
| 11  | 1018483  | rs78265558  | C    | G   | missense         | 0.485   | MUC6     |
| 11  | 1029320  | rs11604757  | C    | T   | missense         | 0.081   | MUC6     |
| 8   | 2046700  | rs2294066   | C    | T   | missense         | 0.151   | MYOM2    |
| 3   | 48419897 | rs6442117   | C    | T   | missense         | 0.59    | FBXW12   |
| 3   | 48422235 | rs6784322   | T    | A   | missense         | 0.404   | FBXW12   |
| 3   | 50332697 | rs13100173  | G    | A   | missense         | 0.369   | HYAL3    |
| 3   | 50332697 | rs13100173  | G    | A   | missense         | 0.369   | HYAL3    |
| 17  | 56435080 | rs9652855   | G    | C   | missense         | 0.097   | RNF43    |
| 17  | 56598991 | rs17741424  | T    | A   | missense         | 0.086   | 38231    |
| 17  | 59489707 | rs77617620  | C    | T   | missense         | 0.043   | C17orf82 |
| 17  | 59489893 | rs9907379   | T    | C   | missense         | 0.689   | C17orf82 |
| 1   | 93620393 | rs1060622   | G    | A   | missense         | 0.586   | TMED5    |

|    |           |            |   |   |             |       |           |
|----|-----------|------------|---|---|-------------|-------|-----------|
| 10 | 123844503 | rs10887063 | C | T | missense    | 0.179 | TACC2     |
| 10 | 123845211 | rs11200387 | G | A | missense    | 0.15  | TACC2     |
| 10 | 124189197 | rs1045216  | A | G | missense    | 0.679 | PLEKHA1   |
| 10 | 124214355 | rs2736911  | C | T | stop_gained | 0.131 | ARMS2     |
| 10 | 124457452 | rs2947594  | C | T | missense    | 0.782 | C10orf120 |
| 10 | 124610027 | rs1891110  | G | A | missense    | 0.528 | FAM24B    |

**Supplementary Table 3. 156 non-synonymous heterozygous coding or splice variants reported in the GnomAD and/or HGID databases.**

| Chr | Pos    | ID          | Ref    | Alt | fuction      | AACChange          | CADD  | MAF      |
|-----|--------|-------------|--------|-----|--------------|--------------------|-------|----------|
| 6   | 393174 | .           | C      | G   | missense     | p.Arg8Gly          | 26.8  | 6.71E-06 |
| 6   | 393175 | rs139884486 | G      | A   | missense     | p.Arg8Gln          | 25.7  | 0.000189 |
| 6   | 393175 | rs139884486 | G      | T   | missense     | p.Arg8Leu          | 28    | 4.99E-05 |
| 6   | 393231 | rs766107516 | TGGCTG | T   | frameshift   | p.Trp27TyrfsTer50  | 35    | 5.51E-06 |
| 6   | 393256 | rs538907751 | G      | C   | missense     | p.Gly35Ala         | 24.4  | 4.84E-06 |
| 6   | 393264 | rs369688140 | C      | T   | missense     | p.Pro38Ser         | 29.5  | 3.67E-05 |
| 6   | 393273 | rs751037944 | G      | C   | missense     | p.Val41Leu         | 24.7  | 2.69E-05 |
| 6   | 393284 | rs753781892 | CGAG   | C   | inframe del  | p.Glu46del         | 22.9  | 8.68E-06 |
| 6   | 393292 | .           | A      | G   | missense     | p.Lys47Arg         | 22.8  | 1.90E-05 |
| 6   | 394822 | rs754867881 | CT     | C   | frameshift   | p.Trp74GlyfsTer28  | 24    | 4.10E-06 |
| 6   | 394848 | .           | C      | T   | stop gained  | p.Arg82Ter         | 40    | 4.07E-06 |
| 6   | 394849 | .           | G      | A   | missense     | p.Arg82Gln         | 24.4  | 4.07E-06 |
| 6   | 394859 | .           | C      | G   | missense     | p.Ile85Met         | 12.09 | 3.23E-05 |
| 6   | 394866 | rs144593192 | C      | G   | missense     | p.Pro88Ala         | 18.71 | 3.61E-05 |
| 6   | 394867 | rs202124383 | C      | A   | missense     | p.Pro88Gln         | 30    | 0.000541 |
| 6   | 394867 | rs202124383 | C      | T   | missense     | p.Pro88Leu         | 33    | 4.06E-06 |
| 6   | 394902 | rs767879003 | G      | A   | missense     | p.Ala100Thr        | 24.7  | 4.06E-06 |
| 6   | 394918 | rs200303421 | A      | G   | missense     | p.Asn105Ser        | 13.56 | 5.77E-05 |
| 6   | 394932 | rs374588785 | C      | A   | missense     | p.Leu110Met        | 24    | 1.62E-05 |
| 6   | 394941 | rs753842732 | C      | T   | missense     | p.Arg113Trp        | 32    | 4.06E-06 |
| 6   | 394981 | rs745876631 | G      | A   | missense     | p.Arg126Lys        | 22.9  | 8.24E-06 |
| 6   | 394986 | rs771936972 | G      | A   | missense     | p.Val128Ile        | 18.17 | 4.27E-06 |
| 6   | 395004 | rs748154669 | A      | G   | missense     | p.Lys134Glu        | 21.6  | 4.31E-06 |
| 6   | 395009 | rs200504236 | T      | C   | splice donor | c.403+2T>C         | 23.9  | 5.22E-05 |
| 6   | 395864 | rs11557493  | C      | G   | missense     | p.Leu141Val        | 15.25 | 1.63E-05 |
| 6   | 395881 | rs115613112 | G      | A   | missense     | p.Met146Ile        | 15.67 | 1.45E-05 |
| 6   | 395885 | .           | A      | G   | missense     | p.Met148Val        | 3.441 | 4.08E-06 |
| 6   | 395886 | .           | T      | C   | missense     | p.Met148Thr        | 8.28  | 3.23E-05 |
| 6   | 395889 | rs73717071  | G      | A   | missense     | p.Ser149Asn        | 5.825 | 0.008454 |
| 6   | 395892 | .           | A      | AT  | frameshift   | p.Tyr152LeufsTer60 | 27.8  | 4.08E-06 |
| 6   | 395894 | .           | C      | T   | missense     | p.Pro151Ser        | 13.44 | 4.08E-06 |
| 6   | 395898 | .           | A      | G   | missense     | p.Tyr152Cys        | 10.74 | 7.24E-06 |
| 6   | 395903 | rs764577689 | A      | G   | missense     | p.Met154Val        | 0.009 | 1.09E-05 |
| 6   | 395903 | rs764577689 | A      | T   | missense     | p.Met154Leu        | 0.09  | 4.08E-06 |
| 6   | 395906 | rs776661032 | A      | C   | missense     | p.Thr155Pro        | 0.005 | 4.09E-06 |
| 6   | 395916 | rs750505973 | A      | T   | missense     | p.Tyr158Phe        | 8.071 | 1.23E-05 |
| 6   | 395919 | rs771434117 | CT     | C   | frameshift   | p.Ser160ArgfsTer11 | 21.4  | 4.10E-06 |
| 6   | 395927 | rs766413794 | C      | G   | missense     | p.Pro162Ala        | 5.153 | 4.12E-06 |
| 6   | 397116 | rs767166788 | C      | G   | missense     | p.His167Gln        | 9.287 | 4.06E-06 |
| 6   | 397123 | .           | A      | G   | missense     | p.Met170Val        | 8.301 | private  |
| 6   | 397125 | .           | G      | A   | missense     | p.Met170Ile        | 21.3  | 4.06E-06 |
| 6   | 397127 | rs755905242 | T      | C   | missense     | p.Met171Thr        | 14.97 | 2.84E-05 |
| 6   | 397128 | .           | G      | A   | missense     | p.Met171Ile        | 18.47 | 4.06E-06 |
| 6   | 397129 | .           | C      | T   | missense     | p.Pro172Ser        | 14.26 | 4.06E-06 |
| 6   | 397130 | rs777399667 | C      | A   | missense     | p.Pro172Gln        | 22.3  | 4.06E-06 |
| 6   | 397138 | .           | G      | A   | missense     | p.Asp175Asn        | 23.6  | 4.06E-06 |
| 6   | 397154 | rs778403209 | A      | G   | missense     | p.Asp180Gly        | 19.46 | 2.03E-05 |
| 6   | 397155 | .           | C      | G   | missense     | p.Asp180Glu        | 1.224 | 4.06E-06 |



|   |        |             |         |   |               |                    |       |          |
|---|--------|-------------|---------|---|---------------|--------------------|-------|----------|
| 6 | 397157 | rs747437180 | A       | G | missense      | p.Tyr181Cys        | 23.6  | 4.06E-06 |
| 6 | 397159 | rs781586995 | G       | A | missense      | p.Val182Ile        | 14.49 | 4.06E-06 |
| 6 | 397170 | rs770110760 | G       | C | missense      | p.Gln185His        | 22.3  | 8.12E-06 |
| 6 | 397172 | .           | C       | T | missense      | p.Pro186Leu        | 23.6  | 4.06E-06 |
| 6 | 397175 | .           | A       | G | missense      | p.His187Arg        | 16.01 | 3.23E-05 |
| 6 | 397178 | .           | C       | T | missense      | p.Pro188Leu        | 22.9  | 1.08E-05 |
| 6 | 397183 | rs763272146 | A       | G | missense      | p.Ile190Val        | 9.874 | 4.06E-06 |
| 6 | 397184 | rs771094772 | T       | A | missense      | p.Ile190Asn        | 21.8  | 4.06E-06 |
| 6 | 397186 | rs774593906 | C       | T | missense      | p.Pro191Ser        | 15.87 | 1.22E-05 |
| 6 | 397201 | .           | A       | G | missense      | p.Met196Val        | 0.002 | 7.21E-06 |
| 6 | 397205 | rs372869810 | C       | T | missense      | p.Thr197Met        | 17.83 | 8.12E-06 |
| 6 | 397205 | rs372869810 | C       | T | missense      | p.Thr197Met        | 17.83 | 8.12E-06 |
| 6 | 397208 | rs763891187 | T       | C | missense      | p.Phe198Ser        | 10.38 | 8.12E-06 |
| 6 | 397213 | .           | C       | T | missense      | p.Pro200Ser        | 9.286 | 4.06E-06 |
| 6 | 397216 | .           | C       | T | missense      | p.Arg201Cys        | 25.8  | 4.06E-06 |
| 6 | 397217 | rs753427028 | G       | A | missense      | p.Arg201His        | 24.2  | 1.22E-05 |
| 6 | 397219 | rs143144957 | G       | A | missense      | p.Gly202Ser        | 0.004 | 7.58E-05 |
| 6 | 397234 | .           | G       | A | missense      | p.Gly207Ser        | 20.2  | 4.06E-06 |
| 6 | 397238 | rs757910134 | C       | A | missense      | p.Pro208Gln        | 23.4  | 7.22E-05 |
| 6 | 398831 | rs538810711 | G       | T | missense      | p.Cys214Phe        | 16.56 | 3.61E-05 |
| 6 | 398863 | .           | C       | A | missense      | p.Pro225Thr        | 24.6  | 6.46E-05 |
| 6 | 398878 | rs147454166 | G       | A | missense      | p.Ala230Thr        | 18.45 | 1.63E-05 |
| 6 | 398884 | rs375133421 | G       | A | missense      | p.Gly232Arg        | 24.4  | 4.06E-06 |
| 6 | 398887 | rs776593233 | G       | A | missense      | p.Val233Ile        | 13.26 | 3.25E-05 |
| 6 | 398888 | rs761579830 | T       | C | missense      | p.Val233Ala        | 16.11 | 4.06E-06 |
| 6 | 398894 | rs765027259 | C       | A | missense      | p.Thr235Lys        | 16.75 | 4.07E-06 |
| 6 | 398914 | rs772851591 | G       | A | missense      | p.Ala242Thr        | 24.7  | 8.15E-06 |
| 6 | 398915 | .           | C       | T | missense      | p.Ala242Val        | 21.5  | 4.08E-06 |
| 6 | 398925 | rs765864636 | G       | C | missense      | p.Leu245Phe        | 22.7  | 4.10E-06 |
| 6 | 401425 | rs758839744 | C       | G | missense      | p.Asp249Glu        | 26.2  | 4.11E-06 |
| 6 | 401430 | rs199834880 | G       | A | missense      | p.Arg251Gln        | 23.8  | 8.20E-06 |
| 6 | 401438 | .           | A       | G | missense      | p.Ile254Val        | 8.678 | 4.08E-06 |
| 6 | 401444 | rs148760922 | C       | A | missense      | p.Leu256Met        | 25.7  | 4.08E-06 |
| 6 | 401448 | .           | A       | T | missense      | p.Tyr257Phe        | 16.05 | 4.08E-06 |
| 6 | 401453 | .           | C       | T | missense      | p.Arg259Trp        | 35    | 1.45E-05 |
| 6 | 401454 | rs781276700 | G       | A | missense      | p.Arg259Gln        | 27.1  | 4.07E-06 |
| 6 | 401492 | rs752393433 | G       | A | missense      | p.Glu272Lys        | 33    | 4.07E-06 |
| 6 | 401501 | rs771669183 | C       | T | missense      | p.Arg275Trp        | 32    | 3.23E-05 |
| 6 | 401502 | rs139858073 | G       | A | missense      | p.Arg275Gln        | 27.6  | 2.53E-05 |
| 6 | 401509 | .           | CCATGGA | C | indel-inframe | p.Gly279_His280del | 20.3  | private  |
| 6 | 401510 | rs765634575 | C       | T | missense      | p.His278Tyr        | 22    | 4.06E-06 |
| 6 | 401520 | rs751008894 | C       | T | missense      | p.Thr281Met        | 22.8  | 1.63E-05 |
| 6 | 401527 | rs114916515 | C       | G | missense      | p.Asp283Glu        | 0.003 | 0.000249 |
| 6 | 401528 | rs767774669 | G       | A | missense      | p.Ala284Thr        | 14.13 | 5.69E-05 |
| 6 | 401528 | rs767774669 | G       | T | missense      | p.Ala284Ser        | 0.642 | 4.06E-06 |
| 6 | 401529 | .           | C       | T | missense      | p.Ala284Val        | 21.3  | 6.46E-05 |
| 6 | 401542 | .           | C       | G | missense      | p.Asp288Glu        | 12.06 | 4.06E-06 |
| 6 | 401545 | .           | G       | C | missense      | p.Gln289His        | 23    | 3.23E-05 |
| 6 | 401571 | rs140099868 | A       | G | missense      | p.Asn298Ser        | 0.434 | 0.000148 |
| 6 | 401589 | rs756281792 | T       | C | missense      | p.Ile304Thr        | 0.256 | 1.44E-05 |
| 6 | 401621 | rs780902340 | G       | A | missense      | p.Val315Met        | 28.2  | 8.14E-06 |
| 6 | 401627 | rs745470687 | C       | A | missense      | p.Leu317Ile        | 29.4  | 1.63E-05 |
| 6 | 401637 | rs775326241 | C       | A | missense      | p.Ala320Asp        | 25.2  | 3.23E-05 |



|   |        |             |      |   |             |             |       |          |
|---|--------|-------------|------|---|-------------|-------------|-------|----------|
| 6 | 401637 | rs775326241 | C    | G | missense    | p.Ala320Gly | 17.79 | 4.07E-06 |
| 6 | 401642 | .           | G    | A | missense    | p.Asp322Asn | 26.4  | 4.07E-06 |
| 6 | 401652 | rs773521348 | A    | G | missense    | p.Tyr325Cys | 24.3  | 4.08E-06 |
| 6 | 401655 | rs201105575 | C    | T | missense    | p.Ala326Val | 23.2  | 6.88E-05 |
| 6 | 401690 | .           | G    | A | missense    | p.Gly338Arg | 24.4  | 4.09E-06 |
| 6 | 401700 | rs200311468 | C    | T | missense    | p.Ala341Val | 25.8  | 0.000342 |
| 6 | 401708 | rs756088477 | A    | C | missense    | p.Asn344His | 16.94 | 4.10E-06 |
| 6 | 401711 | rs753680565 | G    | A | missense    | p.Asp345Asn | 26.4  | 2.18E-05 |
| 6 | 401714 | .           | C    | G | missense    | p.Arg346Gly | 24.8  | 4.10E-06 |
| 6 | 401714 | .           | C    | T | missense    | p.Arg346Trp | 27    | 4.10E-06 |
| 6 | 401715 | rs199596593 | G    | A | missense    | p.Arg346Gln | 25.9  | 2.91E-05 |
| 6 | 401720 | .           | A    | C | missense    | p.Asn348His | 25.5  | 4.10E-06 |
| 6 | 401737 | rs199919569 | C    | G | missense    | p.Asp353Glu | 8.794 | 4.10E-06 |
| 6 | 401748 | rs555752097 | A    | G | missense    | p.Lys357Arg | 28    | 4.10E-06 |
| 6 | 401763 | rs779841481 | A    | C | missense    | p.Gln362Pro | 22.4  | 1.09E-05 |
| 6 | 401775 | .           | C    | T | missense    | p.Ser366Leu | 22.2  | 3.23E-05 |
| 6 | 405027 | rs568315642 | C    | T | missense    | p.Ala370Val | 15.04 | 0.000451 |
| 6 | 405027 | rs568315642 | C    | A | missense    | p.Ala370Glu | 9.242 | 3.23E-05 |
| 6 | 405037 | rs775948276 | C    | G | missense    | p.His373Gln | 13.91 | 4.06E-06 |
| 6 | 405041 | .           | G    | A | missense    | p.Gly375Ser | 22.3  | 3.23E-05 |
| 6 | 405044 | rs768893830 | C    | T | missense    | p.Arg376Cys | 33    | 2.03E-05 |
| 6 | 405045 | rs377483798 | G    | A | missense    | p.Arg376His | 28.6  | 4.88E-05 |
| 6 | 405045 | rs377483798 | G    | C | missense    | p.Arg376Pro | 28.3  | 7.22E-06 |
| 6 | 405045 | rs377483798 | G    | T | missense    | p.Arg376Leu | 27.5  | 4.06E-06 |
| 6 | 405051 | .           | T    | A | missense    | p.Leu378Gln | 23.8  | 4.06E-06 |
| 6 | 405053 | .           | C    | A | missense    | p.Pro379Thr | 29.49 | 4.06E-06 |
| 6 | 405063 | .           | A    | G | missense    | p.Gln382Arg | 21.3  | 3.23E-05 |
| 6 | 405064 | rs750322004 | G    | C | missense    | p.Gln382His | 26    | 4.06E-06 |
| 6 | 405069 | rs142143231 | C    | T | missense    | p.Thr384Ile | 19.71 | 4.06E-06 |
| 6 | 405069 | rs142143231 | C    | T | missense    | p.Thr384Ile | 19.71 | 8.12E-06 |
| 6 | 405088 | rs751335149 | G    | C | missense    | p.Glu390Asp | 27.8  | 1.44E-05 |
| 6 | 405098 | rs201428294 | C    | A | missense    | p.Pro394Thr | 25    | 4.06E-06 |
| 6 | 405098 | rs201428294 | C    | G | missense    | p.Pro394Ala | 17.89 | 2.53E-05 |
| 6 | 405130 | rs141640145 | C    | A | missense    | p.His404Gln | 7.944 | 4.07E-06 |
| 6 | 406770 | .           | T    | C | missense    | p.Leu406Pro | 5.648 | 6.46E-05 |
| 6 | 406772 | .           | A    | T | missense    | p.Arg407Trp | 2.517 | 1.14E-05 |
| 6 | 407474 | rs199763142 | G    | A | missense    | p.Arg411Lys | 23.2  | 9.29E-05 |
| 6 | 407514 | rs760504688 | C    | A | missense    | p.Phe424Leu | 22.9  | 8.14E-06 |
| 6 | 407515 | rs763733876 | C    | G | missense    | p.Leu425Val | 22.2  | 4.07E-06 |
| 6 | 407522 | .           | G    | C | missense    | p.Gly427Ala | 14.31 | 4.07E-06 |
| 6 | 407527 | .           | G    | A | missense    | p.Asp429Asn | 28.5  | 7.23E-06 |
| 6 | 407528 | .           | A    | G | missense    | p.Asp429Gly | 25.6  | 3.23E-05 |
| 6 | 407542 | rs756736434 | A    | T | missense    | p.Ile434Phe | 1.929 | 9.69E-05 |
| 6 | 407543 | rs766230745 | TCAG | T | inframe del | p.Ser435del | 12.91 | 7.23E-06 |
| 6 | 407560 | .           | T    | A | missense    | p.Tyr440Asn | 29.1  | 4.09E-06 |
| 6 | 407561 | .           | A    | T | missense    | p.Tyr440Phe | 16.9  | 4.10E-06 |
| 6 | 407564 | rs752069005 | A    | T | missense    | p.His441Leu | 22.8  | 1.23E-05 |
| 6 | 407566 | .           | A    | G | missense    | p.Arg442Gly | 26.9  | private  |
| 6 | 407572 | rs559734928 | A    | G | missense    | p.Ile444Val | 9.725 | 1.25E-05 |
| 6 | 407575 | rs748516736 | C    | T | missense    | p.Arg445Cys | 35    | 2.10E-05 |
| 6 | 407576 | rs756602021 | G    | A | missense    | p.Arg445His | 23.8  | 2.11E-05 |
| 6 | 407576 | rs756602021 | G    | T | missense    | p.Arg445Leu | 23.8  | 4.23E-06 |
| 6 | 407578 | .           | C    | T | missense    | p.His446Tyr | 29.2  | 4.22E-06 |

|   |        |             |   |   |          |             |    |          |
|---|--------|-------------|---|---|----------|-------------|----|----------|
| 6 | 407582 | rs749474191 | C | T | missense | p.Ser447Phe | 33 | 4.25E-06 |
| 6 | 407585 | .           | C | T | missense | p.Ser448Phe | 32 | 4.27E-06 |

### Supplementary Table 4A. Differentially expressed genes based on transcriptomic data for PBMCs exposed to BCG.

| Probe_Id | Genes      | C1    | C2    | HET1  | HET2  | HET3  | P1    | P2    | P3    | WT1   | WT2   | WT3   | WT4   |
|----------|------------|-------|-------|-------|-------|-------|-------|-------|-------|-------|-------|-------|-------|
| 16650325 | .          | -2.61 | -1.86 | -2.16 | -5.51 | -0.94 | 1.60  | 6.59  | -1.61 | 4.58  | 0.60  | -2.13 | 2.61  |
| 16651241 | .          | 2.88  | -0.97 | 0.08  | -0.38 | 1.39  | 3.74  | -0.44 | 1.31  | 1.60  | -6.16 | 7.29  | -0.76 |
| 16651491 | .          | 1.56  | -3.00 | -3.00 | -1.94 | 1.09  | -0.60 | -2.44 | 0.83  | 0.67  | 4.00  | 3.20  | -2.72 |
| 16651635 | .          | 0.74  | 2.07  | 0.04  | 1.45  | -1.27 | 3.35  | -0.98 | 0.89  | 2.74  | -0.83 | -5.70 | 4.04  |
| 16651639 | .          | -0.45 | 2.61  | 1.70  | 1.03  | -2.12 | 0.40  | -4.84 | -1.50 | 2.45  | -0.31 | 1.12  | 0.90  |
| 16651905 | .          | -3.50 | -1.07 | -4.78 | -1.60 | 1.67  | -4.36 | 1.52  | 1.67  | 0.27  | -3.99 | 1.62  | -1.43 |
| 16653785 | .          | 0.83  | -1.90 | 0.48  | 0.03  | -1.97 | 1.18  | -2.97 | -1.19 | 2.13  | -1.53 | -3.52 | 0.06  |
| 16653831 | .          | -1.06 | -2.19 | -2.03 | 0.29  | 0.73  | -0.03 | -2.33 | 0.28  | 1.14  | -2.07 | 0.12  | -0.84 |
| 16654663 | .          | 0.32  | 1.14  | 2.99  | 0.02  | 2.77  | -2.81 | -3.26 | 2.62  | 4.84  | 3.31  | 1.28  | -1.65 |
| 16655101 | .          | -1.07 | 1.64  | -3.61 | -1.01 | 0.78  | 0.84  | 0.93  | 1.71  | 3.05  | -4.28 | 3.95  | 2.92  |
| 16655337 | .          | 0.33  | 1.15  | -2.49 | -1.06 | -1.07 | -2.77 | -1.88 | -1.16 | -0.96 | -2.42 | 1.33  | 0.99  |
| 16655653 | .          | -0.07 | 2.21  | -2.27 | 2.06  | -1.11 | -0.79 | 0.34  | -2.70 | -6.89 | 0.23  | 4.02  | -3.81 |
| 16656923 | .          | -0.72 | -1.34 | -0.12 | -0.61 | -0.52 | -1.09 | -1.91 | 0.45  | -1.43 | -1.42 | 0.60  | -0.77 |
| 16657193 | .          | 0.44  | 1.84  | 4.66  | -0.77 | 3.19  | -3.03 | -1.02 | 4.64  | 2.86  | -3.32 | 1.21  | -2.33 |
| 16658579 | .          | -0.10 | -0.98 | -0.58 | -0.25 | -0.17 | -1.27 | 0.09  | -1.02 | 1.33  | -0.13 | -1.32 | -0.62 |
| 16658936 | .          | -0.19 | -0.85 | 0.13  | -0.20 | 0.28  | 0.46  | 0.62  | -0.18 | -0.63 | 0.82  | -1.49 | 2.54  |
| 16661646 | RNU11      | 1.62  | 0.80  | -1.36 | 1.68  | 0.28  | -1.38 | -0.66 | 1.54  | 2.83  | 1.36  | 0.18  | 0.11  |
| 16661924 | .          | -0.31 | -0.77 | -1.03 | 0.91  | 1.46  | 0.76  | -0.78 | -0.14 | 0.91  | 0.90  | -2.94 | -0.11 |
| 16663808 | .          | 0.04  | 0.36  | 0.68  | -0.15 | 1.33  | -0.57 | 0.69  | 0.70  | 1.82  | 1.23  | -5.99 | -0.62 |
| 16666237 | .          | 1.28  | 0.63  | 0.25  | 0.09  | -0.67 | 0.23  | -0.32 | 0.10  | 0.72  | -0.84 | 1.47  | -0.41 |
| 16666940 | .          | 3.05  | 3.05  | 2.60  | 2.21  | 2.76  | 0.29  | 1.86  | 0.23  | 4.04  | 2.39  | 2.46  | 1.43  |
| 16668702 | C1orf162   | -2.44 | -2.46 | -1.68 | -1.86 | -2.97 | -1.49 | -0.41 | -1.62 | -3.17 | -2.20 | -2.33 | -2.11 |
| 16669011 | .          | 2.10  | -2.98 | 2.23  | -0.63 | -1.05 | -0.11 | 1.23  | 1.24  | 3.99  | -4.35 | 2.46  | 1.80  |
| 16669708 | NOTCH2NL   | -0.92 | -0.80 | 0.03  | -0.96 | -0.93 | 1.32  | -1.31 | -0.19 | -1.32 | -1.51 | -1.28 | -1.22 |
| 16670383 | HIST2H2AA4 | 1.00  | 1.10  | 0.69  | 0.79  | 0.78  | 0.95  | 0.96  | 0.80  | 1.55  | 1.63  | -0.44 | 1.24  |
| 16670673 | .          | -1.56 | -1.05 | -0.62 | -0.81 | -1.01 | -1.27 | -0.22 | -0.80 | -0.11 | 0.19  | -2.67 | 1.80  |
| 16671139 | S100A9     | 0.73  | 0.33  | -0.17 | 0.99  | 0.03  | 1.04  | -1.02 | 2.02  | -0.69 | 0.67  | -1.60 | 1.01  |
| 16672478 | SLAMF8     | 1.04  | 1.06  | 0.58  | 0.93  | 0.59  | 1.02  | 0.35  | 0.85  | 1.47  | 1.81  | -2.69 | 0.74  |
| 16672654 | SLAMF7     | 2.89  | 2.57  | 1.82  | 1.89  | 2.24  | 0.76  | 0.84  | 1.29  | 3.00  | 2.01  | 0.24  | 3.02  |
| 16676150 | BTG2       | 1.02  | 0.30  | 0.40  | 0.52  | 0.55  | 1.06  | 0.67  | 1.10  | 1.18  | 1.23  | -1.67 | 2.57  |
| 16676988 | HSD11B1    | 3.72  | 4.09  | 2.59  | 4.28  | 2.76  | 0.73  | -1.60 | 1.67  | 3.97  | 4.48  | 1.23  | 1.52  |
| 16678304 | .          | 0.71  | -0.07 | -0.87 | 0.26  | 1.00  | -0.27 | -0.23 | 1.72  | 1.56  | 1.52  | -3.25 | 1.16  |
| 16678314 | .          | 0.69  | -0.29 | -0.54 | 0.02  | 0.28  | 0.07  | 0.29  | 1.49  | 0.89  | 1.58  | -8.45 | 1.95  |
| 16678335 | .          | 1.84  | -0.04 | 1.22  | 0.16  | 0.47  | 1.88  | 1.35  | -0.23 | 2.95  | 1.20  | -4.31 | 3.26  |
| 16678337 | .          | 1.90  | 0.66  | 0.98  | -0.12 | 1.46  | 4.27  | -0.02 | 0.04  | 1.01  | 1.15  | -5.46 | 1.11  |
| 16678342 | .          | 1.52  | -0.02 | 0.71  | -0.68 | 1.16  | 1.31  | 3.10  | -0.44 | 1.67  | 0.14  | -3.58 | 1.07  |
| 16678345 | .          | 1.12  | -0.22 | 0.31  | -0.45 | 0.43  | 1.36  | 1.87  | -0.90 | 0.81  | 0.10  | -1.01 | 0.62  |
| 16683445 | FUCA1      | -3.38 | -2.63 | -3.07 | -3.18 | -2.96 | -0.89 | -0.30 | -2.14 | -3.51 | -3.78 | -5.71 | -2.34 |
| 16685146 | .          | 0.71  | 0.84  | -0.07 | 0.29  | -0.20 | -1.17 | 1.44  | -0.03 | 1.91  | 0.19  | -1.96 | 0.16  |
| 16685148 | .          | 0.21  | 0.86  | 0.10  | 0.06  | 0.63  | -0.79 | 2.78  | 0.04  | 1.57  | 0.78  | -4.19 | 0.76  |
| 16685489 | MTF1       | 1.11  | 1.15  | 1.44  | 1.63  | 2.19  | 2.71  | -0.76 | 1.32  | 1.98  | 2.61  | -0.95 | 1.90  |
| 16689332 | GBP1       | 3.67  | 3.86  | 4.26  | 2.27  | 3.91  | 0.61  | 3.50  | -1.59 | 3.54  | 3.40  | 2.50  | 2.10  |
| 16689354 | GBP2       | 1.21  | 1.83  | 1.71  | 0.99  | 1.67  | -0.45 | 2.86  | -0.32 | 1.88  | 0.99  | 1.52  | 1.80  |
| 16689384 | GBP4       | 3.91  | 3.26  | 3.70  | 3.44  | 4.42  | -0.60 | 3.90  | 0.50  | 6.82  | 2.91  | -0.69 | 4.60  |
| 16689400 | GBP5       | 4.01  | 4.09  | 3.51  | 2.99  | 4.48  | 1.46  | 3.56  | 0.11  | 4.57  | 4.02  | 3.49  | 3.73  |
| 16692553 | .          | -1.32 | -0.83 | 1.31  | -0.01 | -1.09 | -0.68 | -0.72 | 0.45  | 2.54  | -0.71 | 1.29  | -0.64 |
| 16693406 | .          | 0.77  | 0.22  | -0.07 | 0.80  | 0.06  | 0.83  | -1.19 | 1.79  | -1.05 | 0.67  | -0.73 | 0.90  |
| 16693522 | .          | 0.34  | 0.55  | 0.66  | 0.82  | 1.78  | -0.10 | 0.77  | -0.07 | 0.94  | 1.09  | 0.74  | -1.86 |
| 16693523 | .          | 0.33  | 0.37  | 0.10  | 0.57  | 1.10  | -0.70 | -0.39 | 0.57  | 1.08  | 0.86  | -0.99 | -1.50 |
| 16693525 | .          | 0.85  | -0.11 | 0.72  | 0.47  | 1.73  | -1.34 | 0.94  | 2.06  | 1.30  | 0.96  | -1.81 | -1.07 |
| 16693528 | .          | 0.84  | 0.15  | 0.65  | 0.33  | 1.09  | -0.17 | 0.67  | 2.32  | 1.00  | 1.10  | -1.89 | -0.71 |
| 16693530 | .          | 0.08  | 0.65  | 0.81  | 1.50  | 0.97  | -0.47 | -1.60 | 1.91  | 2.65  | 1.75  | -1.85 | 1.83  |
| 16693531 | .          | -0.29 | 0.81  | 0.59  | 2.06  | 1.09  | -0.60 | -0.61 | 1.43  | 2.72  | 1.89  | -5.71 | 1.70  |
| 16693532 | .          | -0.15 | 0.82  | 0.49  | 1.16  | 0.73  | -0.15 | -1.18 | 1.60  | 1.70  | 1.31  | -2.39 | 1.67  |
| 16695572 | PFDN2      | 0.76  | 0.93  | 0.84  | 0.20  | 0.93  | -0.09 | 0.26  | 0.00  | 3.08  | -0.08 | -2.23 | -1.01 |
| 16697095 | NCF2       | 0.61  | 0.47  | 0.59  | 1.09  | 0.59  | 1.09  | 0.12  | 1.33  | 0.90  | 1.44  | -1.17 | 1.52  |
| 16697370 | PTGS2      | 4.57  | 4.84  | 5.44  | 4.70  | 5.77  | 1.57  | 1.21  | 6.22  | 4.96  | 5.30  | 0.50  | 1.88  |
| 16698185 | CHI3L1     | 2.57  | 3.31  | 1.38  | 2.46  | 3.15  | 2.21  | 0.87  | 2.22  | 3.14  | 3.14  | -1.62 | 1.91  |

|          |         |       |       |       |       |       |       |       |       |       |       |       |       |
|----------|---------|-------|-------|-------|-------|-------|-------|-------|-------|-------|-------|-------|-------|
| 16699512 | .       | 2.17  | -1.92 | -2.10 | -0.96 | -0.63 | -2.36 | 1.02  | -1.81 | -0.42 | -1.63 | 1.32  | -4.76 |
| 16702836 | MRC1    | -1.10 | -0.82 | 1.09  | 1.14  | -0.06 | 1.65  | -0.47 | -0.17 | -0.11 | -0.16 | -3.78 | 1.32  |
| 16702881 | MRC1    | -1.04 | -0.84 | 1.13  | 1.18  | -0.19 | 1.75  | -0.52 | -0.09 | -0.08 | -0.29 | -2.96 | 1.26  |
| 16706413 | .       | 2.07  | -1.38 | -1.94 | -0.66 | -1.37 | -0.04 | 1.28  | -1.09 | 2.44  | -0.79 | -1.55 | -0.23 |
| 16711456 | .       | 0.10  | 0.69  | 0.74  | 0.29  | 1.24  | 1.67  | -0.92 | -0.44 | 1.12  | 1.91  | -3.11 | 1.97  |
| 16711458 | .       | -0.88 | 0.17  | -0.78 | -0.65 | -0.13 | 0.69  | 0.46  | -0.42 | 1.13  | 0.88  | -4.12 | -0.88 |
| 16713318 | .       | 2.54  | 1.98  | 2.33  | 2.98  | 2.34  | 4.08  | 0.78  | 3.46  | 2.09  | 4.52  | 3.78  | 6.74  |
| 16713446 | .       | 1.48  | -0.51 | 0.52  | -0.03 | -2.41 | -2.46 | -0.24 | -0.58 | 3.99  | -2.24 | 3.02  | -0.31 |
| 16715241 | PSAP    | -1.24 | -0.98 | -1.29 | -1.00 | -0.84 | -0.48 | -0.21 | -0.73 | -0.90 | -1.01 | -1.92 | -0.82 |
| 16716341 | ANKRD22 | 5.07  | 4.54  | 4.04  | 3.05  | 3.95  | -0.40 | 0.63  | 2.07  | 5.72  | 5.54  | 0.74  | 1.13  |
| 16716590 | MYOF    | 1.44  | 1.90  | 1.15  | 1.52  | 0.88  | 1.07  | 0.32  | 0.27  | 1.53  | 1.35  | -2.15 | 0.43  |
| 16717520 | SNORA12 | -0.58 | -1.25 | -1.28 | -0.76 | 0.66  | 0.28  | -3.50 | 0.61  | -1.50 | -1.06 | -4.75 | 1.49  |
| 16718374 | .       | 1.30  | -0.94 | -0.47 | 0.63  | -0.40 | 1.63  | 0.43  | -0.37 | 1.21  | -0.13 | 0.26  | 1.99  |
| 16721670 | .       | -0.59 | -0.53 | -0.57 | -0.50 | -0.34 | 0.92  | -2.77 | 1.16  | 0.61  | 0.04  | -6.08 | 0.72  |
| 16721674 | .       | -1.16 | -0.02 | -0.35 | 0.06  | -0.07 | -0.92 | -1.09 | 0.47  | -0.02 | -2.10 | -1.85 | -1.18 |
| 16721682 | .       | -1.12 | -0.67 | -0.48 | -1.06 | -0.93 | 0.65  | -0.61 | -0.87 | 1.48  | -0.71 | -0.91 | 0.78  |
| 16727214 | .       | -1.06 | -1.05 | -0.29 | 0.18  | -2.43 | 2.54  | 1.53  | -1.02 | 0.06  | 1.76  | -4.35 | -1.31 |
| 16727216 | .       | -1.49 | -0.13 | 0.56  | -0.41 | 0.07  | -0.47 | -0.88 | 0.35  | -1.28 | 0.91  | -0.39 | -0.83 |
| 16730522 | BIRC3   | 0.93  | 0.73  | 0.94  | 1.16  | 0.98  | 1.64  | -0.63 | 1.13  | 1.58  | 1.60  | -0.24 | 0.44  |
| 16733435 | APLP2   | -1.02 | -0.91 | -0.46 | -0.16 | -0.44 | 0.14  | -0.46 | 0.12  | -0.74 | -0.67 | -1.23 | 0.33  |
| 16734313 | CTSD    | -1.39 | -1.72 | -1.52 | -1.09 | -0.94 | -1.19 | -0.53 | -0.56 | -1.19 | -0.94 | -4.78 | -1.10 |
| 16735139 | .       | -0.90 | -0.52 | 0.54  | 0.52  | -2.22 | 0.29  | 3.03  | -0.54 | -1.17 | -0.31 | -1.78 | 1.07  |
| 16735143 | .       | -1.17 | -1.01 | 1.04  | 0.00  | -0.55 | -0.70 | -1.88 | -0.11 | 0.51  | -0.70 | -0.96 | 0.71  |
| 16735144 | .       | -1.47 | -1.05 | 0.61  | 1.09  | -0.39 | -1.84 | -0.09 | -0.13 | 0.72  | -0.15 | -5.65 | 0.73  |
| 16735145 | .       | -1.28 | -0.69 | 0.45  | 1.32  | -0.50 | -2.52 | -0.75 | -0.04 | 0.07  | -0.33 | -2.39 | 2.19  |
| 16735802 | .       | -0.81 | 0.45  | 0.42  | -0.24 | 0.73  | -0.78 | -0.22 | -0.34 | 1.03  | 0.06  | -4.20 | -0.61 |
| 16735808 | .       | -0.10 | -0.36 | 0.40  | 0.09  | -1.48 | -1.29 | -1.84 | -0.26 | 0.69  | -1.51 | -0.77 | -1.94 |
| 16735812 | .       | -0.13 | -0.60 | 0.21  | -0.78 | -0.28 | 0.18  | 0.29  | 0.76  | 0.59  | -1.18 | -5.61 | -0.35 |
| 16735819 | .       | 0.03  | -0.69 | 0.48  | 0.23  | -0.22 | 1.43  | -1.40 | 0.60  | 1.13  | 1.22  | -4.08 | 0.90  |
| 16735835 | .       | -2.67 | -2.88 | 1.54  | 0.65  | -0.97 | 4.94  | 2.07  | 3.03  | -4.09 | -6.54 | -4.31 | 3.55  |
| 16737102 | .       | 1.35  | 0.15  | 0.58  | 2.40  | 3.53  | 0.53  | -0.47 | 0.01  | 1.29  | 2.14  | 1.93  | 0.79  |
| 16742550 | .       | -0.78 | -0.04 | -0.46 | -0.17 | -1.72 | 2.28  | -4.89 | -0.54 | -2.18 | -1.63 | -5.07 | 1.93  |
| 16744694 | .       | -2.11 | -0.35 | -0.85 | 1.18  | -2.86 | 1.83  | 0.72  | -1.74 | 2.04  | 2.43  | -2.12 | 1.89  |
| 16744696 | .       | -0.49 | 0.38  | -0.02 | 0.06  | -1.99 | 1.04  | -0.05 | -1.82 | 0.83  | 1.15  | -2.99 | 2.60  |
| 16752009 | .       | -1.40 | 0.17  | 0.39  | 1.25  | -0.10 | -1.01 | -0.93 | 1.11  | -1.87 | -0.18 | -1.23 | 1.22  |
| 16752018 | .       | -0.58 | -0.62 | -0.12 | -0.34 | 0.25  | -1.69 | 0.31  | -0.97 | -0.82 | -0.60 | -0.45 | 1.88  |
| 16752645 | IL23A   | 4.26  | 3.56  | 1.83  | 2.24  | 4.97  | 0.37  | -0.26 | 1.58  | 3.26  | 4.32  | 1.28  | 0.79  |
| 16754373 | GLIPR1  | -1.20 | -0.85 | -0.14 | -0.45 | -0.94 | 0.37  | -0.93 | -0.01 | -1.24 | -0.72 | -2.91 | 0.62  |
| 16754394 | .       | 1.13  | -0.23 | 1.44  | 1.52  | 2.06  | 1.26  | 0.32  | 2.24  | 1.28  | 3.19  | -3.21 | 1.51  |
| 16756078 | HSP90B1 | -0.94 | -0.14 | -0.52 | -0.44 | -0.16 | 1.10  | -0.17 | 0.14  | -0.72 | -0.64 | -0.78 | -0.13 |
| 16758622 | .       | -0.62 | -0.20 | 0.21  | -0.32 | -0.80 | 0.41  | 0.50  | -0.72 | 1.18  | -1.58 | -1.60 | -0.49 |
| 16760792 | CD163   | -5.50 | -4.41 | -4.06 | -2.85 | -5.72 | -0.99 | -3.08 | -1.58 | -4.17 | -2.46 | -3.29 | -2.00 |
| 16761012 | A2M     | -1.72 | -1.72 | -0.53 | -0.84 | -0.44 | -1.03 | 0.99  | -1.96 | -1.68 | -1.61 | -3.50 | -1.05 |
| 16764077 | .       | -1.38 | -0.90 | -0.82 | 0.29  | -0.32 | 0.19  | 0.84  | 0.80  | 1.70  | -1.21 | -8.96 | 3.29  |
| 16767247 | IFNG    | 7.44  | 5.86  | 2.74  | 0.27  | 3.57  | -0.12 | -0.36 | -0.91 | 5.18  | 5.28  | 0.24  | 0.36  |
| 16769735 | .       | 0.39  | -0.26 | -0.57 | 0.99  | -0.80 | -1.79 | -0.10 | -0.61 | 0.86  | -1.18 | -3.08 | -1.11 |
| 16769746 | .       | -2.60 | -0.63 | -0.62 | 0.03  | 0.34  | 0.04  | 1.23  | -0.33 | -0.06 | 0.43  | -1.33 | -0.97 |
| 16769749 | .       | -0.88 | -0.57 | -0.72 | 0.96  | 0.32  | 0.31  | -1.17 | 1.27  | 1.75  | 0.86  | -0.73 | -0.44 |
| 16769756 | .       | 1.51  | -2.17 | 0.41  | 2.70  | 0.16  | -0.01 | -1.72 | -0.46 | 7.07  | 2.91  | -0.36 | 2.33  |
| 16770534 | .       | -3.36 | 2.22  | -1.62 | -0.71 | -4.43 | -5.00 | -3.78 | 3.41  | -4.15 | -3.05 | 5.55  | 3.28  |
| 16771356 | .       | -0.84 | -1.24 | -1.53 | -0.73 | 0.73  | -1.15 | -0.12 | -0.63 | -1.54 | -0.91 | -2.00 | -0.47 |
| 16771482 | .       | -0.87 | -0.10 | 0.16  | 0.53  | 0.78  | -0.27 | 0.30  | -0.40 | -2.95 | 1.27  | -6.73 | -1.86 |
| 16771493 | .       | 0.03  | -0.07 | -2.30 | -0.12 | -0.76 | -0.41 | -0.28 | 1.31  | 1.46  | -0.70 | -2.81 | 2.32  |
| 16771496 | .       | -1.05 | 1.23  | 0.28  | 0.13  | -1.36 | -2.05 | -1.99 | 2.23  | -2.36 | -1.18 | -4.33 | 3.24  |
| 16771497 | .       | -1.23 | 1.15  | 0.42  | 1.56  | -1.86 | -0.89 | -5.44 | 1.46  | -0.57 | -0.23 | -5.82 | 3.50  |
| 16771511 | .       | -1.28 | 1.92  | -1.08 | 1.23  | 0.50  | 2.59  | -0.30 | 0.00  | -2.84 | -0.47 | -1.81 | -2.02 |
| 16771512 | .       | -1.45 | 1.50  | -1.81 | 1.54  | 0.55  | 2.38  | -0.40 | 0.44  | -2.76 | -0.79 | -3.52 | -2.99 |
| 16771518 | .       | -1.73 | 1.00  | 1.98  | -1.28 | 1.01  | -1.89 | -0.88 | -0.79 | -1.98 | 4.73  | -3.33 | 3.30  |
| 16779839 | KCTD12  | -1.35 | -1.19 | -1.33 | -1.01 | -2.22 | -1.25 | -0.99 | -0.98 | -1.85 | -0.64 | -2.93 | -0.80 |
| 16781591 | RNASE6  | -4.58 | -5.12 | -3.02 | -1.83 | -2.81 | -1.39 | -0.97 | -1.73 | -3.32 | -2.13 | -4.38 | -0.53 |
| 16788390 | .       | -0.52 | 0.00  | -0.70 | -0.22 | -0.65 | -1.43 | -0.39 | -0.79 | 1.80  | -0.59 | -3.78 | -0.77 |
| 16788417 | .       | 2.72  | 2.68  | 2.68  | 2.69  | 2.13  | 1.00  | 3.01  | 0.45  | 3.11  | 1.60  | 1.85  | 1.51  |
| 16790246 | .       | -0.89 | -1.37 | 0.19  | 0.57  | -1.16 | 2.45  | -4.59 | 0.41  | 4.43  | -2.25 | -1.79 | 0.73  |

|          |          |       |       |       |       |       |       |       |       |       |       |       |       |
|----------|----------|-------|-------|-------|-------|-------|-------|-------|-------|-------|-------|-------|-------|
| 16790260 | .        | 1.22  | -0.24 | 0.89  | -0.51 | 1.85  | 0.45  | -1.52 | 0.78  | 1.46  | 2.86  | -5.26 | -1.37 |
| 16791991 | NFKBIA   | 1.41  | 0.82  | 0.78  | 0.64  | 0.85  | 1.31  | 0.11  | 1.26  | 0.91  | 1.02  | -0.64 | 0.39  |
| 16794260 | .        | -0.24 | -1.80 | -0.40 | 0.11  | -0.41 | -0.09 | 0.31  | 0.49  | 3.43  | -0.66 | -0.61 | 0.82  |
| 16795366 | SNORA79  | -1.22 | -0.87 | -0.83 | -0.40 | -0.77 | -0.50 | -0.36 | -0.21 | 0.13  | -0.84 | -0.78 | -0.82 |
| 16796060 | LGMN     | -3.03 | -2.75 | -2.61 | -2.55 | -1.95 | -1.68 | 0.22  | -2.32 | -3.04 | -2.27 | -4.58 | -2.02 |
| 16796694 | WARS     | 2.93  | 2.72  | 2.75  | 1.83  | 3.09  | 1.41  | 1.84  | 0.30  | 3.07  | 2.81  | -0.29 | 2.83  |
| 16800630 | C15orf48 | 2.26  | 3.13  | 3.12  | 2.42  | 2.21  | 1.88  | 0.42  | 3.50  | 4.28  | 3.08  | 2.07  | 2.28  |
| 16800680 | SQRDL    | 0.94  | 0.16  | 1.22  | 1.19  | 0.99  | 0.66  | 0.35  | 0.90  | 1.81  | 0.95  | -1.45 | 1.35  |
| 16807320 | .        | -1.11 | -0.60 | 0.20  | -0.58 | -0.74 | -0.44 | 1.34  | -0.37 | -0.75 | -0.62 | -1.32 | 0.82  |
| 16811437 | HEXA     | -1.68 | -1.70 | -1.17 | -1.59 | -0.40 | -2.94 | 0.02  | -1.18 | -2.29 | -0.55 | -3.58 | -1.45 |
| 16815137 | ATP6V0C  | -0.81 | -0.97 | -0.51 | -0.51 | -0.08 | -0.87 | -1.06 | -0.84 | -0.40 | 0.39  | -2.18 | -0.66 |
| 16818272 | ITGAX    | -0.01 | 0.48  | 0.63  | 0.37  | 0.81  | 0.93  | 0.80  | 0.72  | 2.02  | 1.53  | -3.18 | 1.15  |
| 16818431 | ZNF267   | 1.05  | 1.01  | 0.72  | 1.07  | 1.07  | 0.00  | 0.80  | 0.74  | 1.44  | 1.15  | 0.49  | 0.61  |
| 16819207 | MT2A     | 1.58  | 2.09  | 1.71  | 2.01  | 1.32  | 3.12  | 0.05  | 1.57  | 3.25  | 1.48  | 2.05  | 2.95  |
| 16819244 | MT1CP    | 2.07  | 2.39  | 2.48  | 2.02  | 1.79  | 1.53  | 1.43  | 2.51  | 2.62  | 2.52  | 0.90  | 2.08  |
| 16819252 | MT1F     | 2.46  | 2.17  | 4.01  | 1.89  | 2.48  | 4.99  | -0.07 | 2.76  | 2.00  | 2.62  | 2.97  | 4.91  |
| 16819257 | MT1H     | 6.67  | 5.00  | 5.71  | 3.24  | 2.03  | 2.15  | -6.95 | 4.67  | 7.33  | 3.45  | 4.08  | 2.10  |
| 16819264 | MT1X     | 2.94  | 2.99  | 0.94  | 1.00  | 1.18  | 3.09  | -0.12 | 3.91  | 1.63  | 2.30  | -0.28 | 1.36  |
| 16819478 | CCL22    | 1.18  | 0.96  | 2.42  | 2.07  | 3.09  | 3.98  | -0.38 | 5.66  | 3.12  | 1.12  | -0.46 | 3.43  |
| 16823098 | .        | -0.21 | 1.56  | 0.67  | 0.64  | 0.29  | -0.72 | 0.54  | -0.43 | 1.07  | 0.57  | -2.46 | 1.19  |
| 16824132 | NTAN1    | -1.75 | -2.44 | -1.47 | -1.24 | -2.29 | -0.42 | -0.82 | -1.15 | -1.82 | -2.15 | -3.75 | -0.66 |
| 16826738 | MT1G     | 6.55  | 5.16  | 4.45  | 5.61  | 3.25  | 4.84  | -2.65 | 3.06  | 5.43  | 6.42  | 4.54  | 6.31  |
| 16828515 | .        | 0.19  | 0.74  | 0.51  | 0.86  | 0.31  | 0.34  | 0.00  | -0.32 | 1.18  | -0.33 | 1.11  | -0.60 |
| 16828522 | .        | 0.42  | 0.72  | -1.27 | 0.78  | -0.13 | 2.66  | 0.64  | -1.58 | -1.68 | 1.46  | -3.00 | 4.21  |
| 16828527 | .        | 1.38  | 0.44  | -1.43 | 0.17  | 0.98  | -1.53 | -0.50 | 0.60  | 2.43  | 1.73  | -6.29 | -1.22 |
| 16828528 | .        | 0.80  | 0.63  | -1.13 | 0.56  | 0.07  | -1.00 | 0.48  | -0.19 | 0.27  | 0.82  | -0.15 | 0.66  |
| 16828529 | .        | 1.69  | -1.00 | -2.21 | 2.92  | -2.13 | -2.51 | 1.69  | -0.60 | 3.89  | 3.16  | -2.54 | 0.38  |
| 16828531 | .        | 0.92  | 0.52  | -0.90 | 0.52  | 0.58  | -1.47 | 0.19  | -0.26 | 0.61  | 0.79  | -1.17 | 0.39  |
| 16828826 | COTL1    | -1.31 | -1.18 | -1.11 | -0.21 | -1.31 | 0.04  | -1.04 | -0.29 | -1.18 | 0.54  | -3.45 | -1.47 |
| 16830577 | CD68     | -0.66 | -0.71 | -0.65 | -0.36 | -0.35 | -0.31 | -0.02 | -0.56 | -0.76 | -0.29 | -2.82 | -0.20 |
| 16833224 | CCL8     | 5.27  | 5.85  | 4.58  | 4.54  | 3.40  | -0.66 | 0.42  | 0.79  | 5.96  | 6.21  | 4.77  | 2.00  |
| 16833420 | CCL4     | 2.59  | 2.29  | 2.84  | 2.49  | 1.75  | 2.64  | 1.11  | 2.22  | 2.59  | 2.42  | 2.44  | 3.50  |
| 16833426 | CCL4L2   | 3.14  | 2.55  | 3.13  | 4.04  | 3.69  | 3.22  | -0.42 | 3.02  | 3.29  | 3.32  | 0.83  | 3.73  |
| 16833698 | PSMB3    | 0.76  | 0.87  | 0.60  | 0.59  | -0.02 | -0.39 | 0.80  | 0.76  | 1.63  | 1.67  | -2.38 | 0.29  |
| 16834764 | .        | -0.72 | -1.67 | -0.15 | -1.01 | -0.52 | -2.37 | 0.96  | -1.72 | -1.11 | -0.16 | -3.10 | -1.59 |
| 16834766 | GRN      | -1.99 | -1.58 | -2.11 | -1.79 | -1.76 | -1.39 | -0.67 | -1.70 | -2.41 | -2.13 | -3.20 | -1.25 |
| 16835618 | .        | -0.56 | 1.47  | -0.80 | -1.66 | 0.39  | -1.46 | 0.45  | 0.23  | -0.33 | 2.43  | -4.17 | 0.74  |
| 16835641 | .        | -0.29 | -0.71 | 1.05  | -0.09 | 0.20  | 2.99  | 1.93  | -2.54 | 3.94  | 0.73  | -6.60 | 3.42  |
| 16836624 | MIR21    | -1.71 | 1.06  | 0.02  | -0.99 | 0.47  | -1.10 | -0.69 | -0.18 | 2.60  | 0.90  | -2.35 | -2.07 |
| 16838330 | SYNGR2   | 0.02  | -0.42 | -1.43 | -0.48 | -0.93 | -0.59 | -1.19 | -0.10 | 1.18  | -0.77 | -4.50 | -1.99 |
| 16839481 | .        | -1.87 | 0.14  | -1.11 | -0.55 | 1.14  | 0.03  | 2.80  | -0.37 | 0.59  | -0.13 | -2.80 | -1.29 |
| 16839487 | .        | 0.74  | -1.25 | -0.11 | -1.62 | 0.44  | -0.66 | -1.08 | 0.44  | 4.55  | 0.51  | -0.94 | 0.09  |
| 16839489 | .        | -4.43 | -1.18 | -0.73 | -1.86 | 0.97  | 2.33  | -2.40 | -0.09 | -1.29 | 5.51  | -5.76 | 3.90  |
| 16839494 | .        | 0.91  | -0.02 | -0.43 | 0.25  | -0.05 | 1.36  | 1.40  | 0.27  | -2.52 | 0.40  | -2.65 | 2.14  |
| 16839497 | .        | -1.39 | -0.12 | -0.83 | -0.96 | 0.07  | 0.44  | -0.80 | -0.71 | 0.06  | -0.65 | -7.93 | 1.12  |
| 16839502 | .        | -1.06 | -1.32 | 0.42  | -0.03 | 0.17  | -1.91 | 0.85  | -1.09 | 0.27  | -0.52 | -6.59 | -0.81 |
| 16839515 | .        | -0.81 | -0.84 | 0.22  | -0.11 | -1.10 | -1.55 | -2.14 | 1.17  | 3.83  | 0.92  | -7.87 | -0.16 |
| 16839516 | .        | -1.35 | -1.38 | 0.65  | -0.82 | -0.81 | -0.95 | -0.20 | -0.53 | 7.35  | 1.37  | -6.19 | 1.23  |
| 16840113 | CXCL16   | 1.57  | 0.53  | 0.44  | 0.86  | 1.07  | 0.69  | 0.69  | 1.50  | 2.55  | 2.24  | -1.26 | 2.49  |
| 16840588 | .        | -1.00 | -0.52 | -0.02 | -0.65 | 0.13  | 1.19  | -0.59 | -1.60 | 0.82  | 0.26  | -1.85 | -1.28 |
| 16840591 | .        | -0.62 | -0.64 | 0.26  | -0.19 | -0.03 | -0.98 | -1.05 | -0.22 | 0.14  | 0.85  | -3.60 | 1.45  |
| 16843309 | CCL1     | 5.00  | 5.02  | 6.67  | 6.25  | 5.21  | 5.60  | -0.28 | 6.81  | 4.80  | 4.97  | 1.26  | 3.50  |
| 16843602 | CCL3L3   | 3.45  | 3.65  | 3.83  | 4.06  | 4.12  | 3.48  | 0.84  | 3.85  | 4.08  | 4.17  | 0.75  | 3.65  |
| 16844381 | CCR7     | 1.06  | 0.74  | 0.55  | 0.80  | 1.13  | 0.62  | 0.41  | 1.31  | 1.05  | 1.31  | 0.12  | 1.00  |
| 16847821 | .        | -0.93 | -0.43 | 0.22  | -0.65 | -1.48 | 1.20  | -2.45 | -0.39 | 1.23  | -3.24 | -4.06 | -3.03 |
| 16847826 | .        | 0.37  | 0.13  | -0.15 | -0.01 | -0.44 | 0.15  | -1.23 | 0.32  | 2.02  | 0.66  | -4.09 | 0.96  |
| 16847832 | .        | 0.72  | 0.46  | 0.74  | 0.31  | 0.18  | 2.88  | 0.91  | 0.22  | 1.14  | 0.41  | -1.24 | 1.07  |
| 16848888 | H3F3B    | 1.21  | 0.35  | 0.64  | 0.99  | 0.06  | -0.72 | 0.32  | 2.09  | 1.38  | 0.10  | -0.70 | 0.66  |
| 16850286 | MIR4525  | 0.41  | -0.36 | 0.55  | 0.50  | -0.25 | -0.40 | -3.29 | 0.29  | -0.61 | -1.56 | 1.52  | -1.17 |
| 16852871 | SERPINB2 | 3.96  | 3.90  | 4.92  | 4.89  | 3.09  | 6.60  | 2.15  | 5.11  | 4.87  | 2.65  | 3.24  | 6.17  |
| 16855166 | .        | -1.83 | 1.32  | 0.06  | 0.47  | -0.40 | -1.28 | -0.28 | -1.68 | -1.65 | -1.53 | -2.64 | -2.47 |
| 16855493 | .        | -1.12 | -0.58 | 0.68  | 0.39  | -0.09 | -0.01 | 0.01  | -0.94 | 0.76  | 1.04  | -0.63 | -0.75 |
| 16855497 | .        | -0.02 | -1.35 | -0.67 | 0.33  | -0.11 | 0.59  | -0.92 | -0.58 | -1.64 | -1.62 | -1.34 | -0.26 |



|          |         |       |       |       |       |       |       |       |       |       |       |       |       |
|----------|---------|-------|-------|-------|-------|-------|-------|-------|-------|-------|-------|-------|-------|
| 16855498 | .       | -0.58 | -1.83 | -0.69 | 0.42  | -0.36 | 1.36  | -3.35 | -1.14 | -1.37 | -1.03 | -4.49 | 0.08  |
| 16855502 | .       | -1.08 | -0.91 | 0.01  | -0.31 | 0.08  | 1.05  | -0.20 | -0.63 | -0.78 | 0.70  | -1.69 | -0.23 |
| 16855508 | .       | -1.46 | -0.97 | -1.06 | 0.06  | 0.21  | 0.44  | -1.27 | -1.63 | 0.02  | -0.07 | -2.81 | -0.79 |
| 16857612 | MCOLN1  | -1.25 | -1.01 | -0.95 | -0.52 | 0.10  | -0.06 | 1.37  | -1.28 | -1.53 | -0.21 | -3.31 | -1.06 |
| 16857916 | .       | 1.19  | 0.15  | -0.20 | -0.41 | -0.03 | 1.70  | 0.05  | 0.33  | 1.88  | 0.09  | -2.25 | 2.72  |
| 16858710 | JUNB    | 0.86  | 0.59  | -0.04 | 1.14  | 1.37  | 0.01  | 0.01  | 1.41  | 2.47  | 1.33  | -3.67 | 1.20  |
| 16858774 | CALR    | -0.63 | -0.59 | -0.40 | -0.35 | -0.80 | -0.14 | -0.02 | -0.50 | -0.60 | 0.04  | -3.64 | -0.14 |
| 16859763 | IFI30   | -1.01 | -1.03 | -0.92 | -0.74 | -0.71 | -0.52 | -0.08 | -0.86 | -0.82 | -0.69 | -2.12 | -0.61 |
| 16859821 | .       | -1.42 | 1.63  | -0.89 | -1.22 | -0.86 | 1.72  | 5.97  | -3.49 | 5.13  | -1.87 | -3.84 | 0.91  |
| 16859822 | .       | -0.99 | 0.81  | 0.15  | -0.62 | -0.54 | -0.02 | 0.98  | -1.87 | 1.72  | -0.66 | -0.63 | 0.00  |
| 16860971 | HAMP    | -2.67 | -2.66 | -3.18 | -2.99 | -4.03 | -3.50 | -0.73 | -2.68 | -4.25 | -3.46 | -5.35 | -2.35 |
| 16861380 | CAPNS1  | -0.04 | -0.62 | -0.49 | -0.35 | -0.68 | 0.65  | 0.91  | -0.31 | 0.70  | -0.38 | -3.30 | -0.62 |
| 16861384 | .       | 0.18  | -0.84 | -0.86 | -0.58 | -0.31 | 1.04  | 0.71  | -1.71 | 3.87  | 0.73  | -7.15 | 0.26  |
| 16861390 | .       | -0.65 | -0.71 | -0.61 | -0.38 | -1.41 | -0.65 | 1.65  | 0.15  | -0.53 | -1.07 | -1.47 | -0.47 |
| 16861392 | .       | -0.27 | -1.05 | -0.33 | -0.19 | -0.42 | 0.63  | 1.40  | -0.35 | 0.87  | -0.39 | -6.87 | 1.37  |
| 16861887 | ECH1    | -1.33 | -0.51 | -0.53 | 0.27  | -0.83 | -2.34 | 0.32  | 0.09  | 1.62  | -1.64 | -3.87 | -1.63 |
| 16863124 | APOC1   | -5.56 | -6.12 | -4.40 | -3.08 | -3.42 | -3.07 | -1.22 | -3.63 | -2.23 | -3.50 | -3.86 | -3.96 |
| 16864756 | FPR3    | -1.13 | -1.13 | -0.54 | -0.20 | -1.50 | 0.18  | 0.22  | -0.91 | -0.76 | -0.19 | -3.48 | 0.11  |
| 16866174 | UBE2CP5 | 2.17  | -0.24 | 0.17  | 0.39  | 1.20  | -0.22 | -1.71 | -1.13 | -1.17 | -2.28 | 3.15  | -0.89 |
| 16866283 | .       | -0.03 | 0.68  | -0.34 | 0.85  | -0.02 | 1.17  | 0.17  | -0.06 | -0.09 | 1.01  | -4.47 | -0.64 |
| 16866562 | .       | -1.06 | -0.64 | -0.72 | -0.17 | -0.23 | -0.78 | -0.51 | 0.57  | -0.94 | -0.54 | -1.34 | 0.43  |
| 16867217 | .       | -0.26 | -0.50 | -0.05 | -0.04 | 0.30  | 0.59  | 0.82  | 0.84  | 0.75  | 1.04  | -3.54 | 1.50  |
| 16869487 | .       | -0.63 | -0.68 | -0.41 | 0.06  | -0.14 | -0.03 | -0.33 | -0.36 | 0.77  | -0.61 | 1.16  | -0.75 |
| 16869684 | ADGRE2  | -0.85 | 0.47  | 1.28  | 1.71  | 0.81  | 2.20  | -0.19 | 0.94  | 3.23  | 2.15  | -4.18 | 2.27  |
| 16871546 | TYROBP  | -0.76 | -0.78 | -0.62 | -0.29 | -0.60 | -0.47 | -0.14 | -0.31 | -0.61 | 0.04  | -2.66 | -0.12 |
| 16872452 | BLVRB   | -1.20 | -1.58 | -0.84 | -1.67 | -1.22 | -1.97 | -0.28 | -1.73 | -1.55 | -1.23 | -2.16 | -1.09 |
| 16873060 | PLAUR   | 2.57  | 2.12  | 2.33  | 2.43  | 2.37  | 0.92  | 0.73  | 2.55  | 2.77  | 3.00  | -0.08 | 1.17  |
| 16874001 | .       | -0.70 | -0.03 | -0.81 | -0.65 | 1.35  | 0.06  | 0.28  | 0.52  | 1.23  | 0.45  | -3.27 | 1.29  |
| 16880942 | PLEK    | 1.49  | 0.95  | 0.49  | 0.91  | 0.94  | 0.49  | 1.28  | 0.24  | 1.14  | 1.29  | -0.30 | 1.80  |
| 16884372 | MERTK   | -3.14 | -4.64 | -2.91 | -2.54 | -5.21 | -1.72 | -1.32 | -0.56 | -4.65 | -1.85 | -3.43 | -1.80 |
| 16884629 | IL1RN   | 1.95  | 1.23  | 2.73  | 2.88  | 3.48  | 2.74  | -0.19 | 2.67  | 2.05  | 2.32  | -0.31 | 1.57  |
| 16885625 | FAR2P3  | -0.15 | -0.05 | -1.33 | -1.24 | -0.13 | -0.31 | -1.32 | 0.75  | 0.73  | -1.41 | 1.69  | -1.05 |
| 16886174 | KYNU    | 0.71  | 1.01  | 1.38  | 1.43  | 0.85  | 2.15  | 0.19  | 1.79  | 2.64  | 1.67  | -2.11 | 2.59  |
| 16886491 | TNFAIP6 | 5.56  | 5.61  | 4.39  | 4.94  | 5.31  | 2.32  | -0.55 | 5.49  | 5.45  | 6.34  | 4.03  | 2.89  |
| 16889725 | .       | 1.24  | -3.03 | 0.11  | -0.79 | -1.23 | -0.29 | -4.09 | -0.16 | 3.83  | -7.85 | -6.83 | -4.40 |
| 16893456 | .       | 1.52  | -3.41 | 0.91  | 0.18  | -1.99 | -2.12 | 2.18  | -0.55 | 3.90  | -0.93 | -4.35 | 1.71  |
| 16893467 | .       | 0.33  | -1.50 | -0.92 | -0.31 | 1.12  | -2.45 | 1.01  | 1.62  | 0.76  | 0.63  | -3.89 | -2.07 |
| 16898487 | .       | -1.28 | 1.28  | 1.16  | 1.07  | -3.04 | -1.32 | -0.45 | 0.28  | 1.21  | 2.11  | -6.67 | 3.62  |
| 16900096 | IGKC    | 0.22  | 0.06  | 2.17  | 0.03  | 1.36  | -1.03 | -3.73 | 0.79  | 1.65  | 0.59  | -4.83 | 0.62  |
| 16900475 | .       | -0.67 | -0.11 | 0.48  | 0.70  | 0.14  | -2.87 | 1.22  | 0.23  | -0.63 | 0.23  | -0.75 | -1.68 |
| 16900484 | .       | -1.49 | -2.23 | -0.83 | -0.57 | -0.84 | 0.73  | 4.71  | -0.35 | -1.76 | 0.34  | 0.40  | 0.78  |
| 16900485 | .       | -0.42 | -0.87 | -0.64 | -0.14 | -0.36 | -0.05 | 0.42  | 0.49  | 1.10  | 0.05  | 0.84  | 1.29  |
| 16900487 | .       | -0.49 | -1.03 | 0.27  | -0.50 | 0.17  | 1.04  | -0.93 | 0.02  | -1.61 | -0.16 | -3.86 | 1.12  |
| 16900509 | .       | -0.37 | 0.64  | 0.37  | 0.08  | 1.25  | -1.92 | -1.79 | -0.05 | 2.24  | 0.56  | -1.97 | -4.20 |
| 16900519 | .       | 0.79  | -0.55 | -1.60 | -0.61 | -0.66 | 1.64  | 1.37  | 0.03  | -1.36 | 0.10  | -5.97 | -1.07 |
| 16900520 | .       | 0.37  | -0.61 | -0.63 | -0.25 | -0.62 | -1.57 | 2.73  | 1.18  | 0.67  | -0.12 | -3.11 | 1.41  |
| 16900522 | .       | 0.10  | -0.18 | 0.12  | 1.16  | -1.01 | -4.12 | 1.91  | 0.45  | 1.65  | -1.09 | -7.03 | -0.65 |
| 16900525 | .       | 0.52  | -0.93 | 0.08  | -0.17 | 0.62  | 0.41  | 2.44  | -0.05 | 4.04  | 2.74  | -3.34 | 0.51  |
| 16901974 | IL1A    | 6.43  | 5.59  | 6.27  | 6.65  | 7.12  | 3.86  | -0.01 | 6.79  | 6.77  | 7.19  | 3.05  | 4.30  |
| 16901986 | IL1B    | 4.91  | 4.89  | 4.91  | 6.10  | 6.42  | 5.74  | -1.98 | 6.76  | 5.29  | 6.12  | 3.62  | 5.55  |
| 16906534 | STAT1   | 1.03  | 1.34  | 1.33  | 2.07  | 0.84  | -0.43 | 1.70  | -0.60 | 1.08  | 1.44  | 0.82  | 1.91  |
| 16914352 | CTSA    | -1.58 | -1.00 | -0.85 | -1.23 | -0.85 | -1.05 | 0.70  | -0.89 | -0.61 | -0.27 | -4.29 | -1.07 |
| 16914395 | MMP9    | 0.58  | 0.76  | 1.18  | 1.23  | 0.44  | 1.95  | -0.09 | 1.88  | 2.17  | 1.14  | -2.40 | 1.29  |
| 16917939 | CST3    | -1.09 | -1.10 | -1.45 | -0.77 | -1.25 | -1.12 | -0.70 | -1.36 | -1.87 | -0.10 | -2.37 | 0.12  |
| 16919242 | MAFB    | -1.32 | -1.37 | -0.80 | -1.48 | -1.76 | -0.38 | 0.39  | -1.03 | -1.64 | -0.55 | -2.22 | 0.34  |
| 16920169 | B4GALT5 | 1.86  | 1.20  | 0.79  | 0.16  | 0.94  | -1.40 | 1.40  | -0.18 | 1.91  | 1.46  | -1.38 | -0.26 |
| 16924145 | BAGE2   | -1.07 | -1.31 | -0.23 | -0.61 | -1.05 | 1.32  | -0.45 | -0.83 | 1.49  | -1.07 | -1.80 | 0.17  |
| 16929562 | HMOX1   | -2.83 | -2.15 | -2.02 | -1.64 | -1.24 | -2.00 | -0.19 | -1.54 | -0.79 | -0.96 | -3.22 | -1.92 |
| 16930938 | RNU12   | 2.03  | -0.62 | 0.70  | 0.90  | 0.74  | -0.45 | 0.30  | 0.33  | -3.45 | -1.60 | 1.64  | 1.77  |
| 16941344 | ALAS1   | 1.47  | 1.74  | 2.21  | 1.03  | 1.51  | -0.05 | 0.47  | 0.74  | 2.59  | 1.73  | 0.72  | 1.57  |
| 16948561 | .       | -0.96 | -0.93 | -0.97 | -0.53 | -1.04 | -0.57 | -1.03 | -0.85 | -0.14 | -0.81 | -1.96 | -0.55 |
| 16967771 | CXCL8   | 4.16  | 3.09  | 5.33  | 5.56  | 3.07  | 2.52  | 0.30  | 4.60  | 6.53  | 4.26  | 2.23  | 2.79  |
| 16967843 | EREG    | 4.10  | 3.16  | 3.83  | 5.17  | 4.05  | 5.26  | 0.30  | 6.61  | 4.39  | 5.14  | 0.87  | 3.79  |

|          |          |       |       |       |       |       |       |       |       |       |       |       |       |
|----------|----------|-------|-------|-------|-------|-------|-------|-------|-------|-------|-------|-------|-------|
| 16970074 | SNORA24  | 0.03  | -0.61 | -0.77 | -1.00 | -1.92 | -1.54 | -1.39 | -1.75 | -0.65 | -0.61 | -1.34 | -0.24 |
| 16976827 | CXCL5    | 5.53  | 4.82  | 6.47  | 7.57  | 6.14  | 7.01  | -0.82 | 8.74  | 3.31  | 6.91  | 3.45  | 6.57  |
| 16976844 | CXCL2    | 2.41  | 1.24  | 2.47  | 2.14  | 0.92  | 1.36  | 1.72  | 1.61  | 2.42  | 1.70  | 3.20  | 1.61  |
| 16977045 | CXCL9    | 2.78  | 5.40  | 3.08  | 5.53  | 6.24  | -2.92 | 3.19  | -3.88 | 5.64  | 3.40  | 5.46  | 5.97  |
| 16977052 | CXCL10   | 2.28  | 4.27  | 3.64  | 3.33  | 3.16  | 0.99  | 2.03  | -3.14 | 2.31  | 2.52  | 2.26  | 4.68  |
| 16977343 | .        | -2.65 | 0.35  | 2.56  | -0.92 | 1.92  | 1.23  | -3.05 | -0.46 | 0.45  | -1.96 | -2.80 | 4.29  |
| 16977358 | .        | 0.72  | -0.94 | -2.31 | -0.74 | -0.30 | 0.44  | 4.61  | -0.69 | 6.18  | -0.04 | -2.90 | 0.59  |
| 16979917 | SLC7A11  | 3.02  | 2.73  | 3.40  | 3.88  | 2.83  | 3.00  | 0.23  | 4.81  | 5.34  | 3.26  | -1.73 | 3.73  |
| 16983266 | .        | 1.33  | -1.36 | 0.45  | -0.15 | 0.58  | 2.21  | 2.48  | 2.09  | -1.03 | -0.40 | 1.58  | 2.94  |
| 16984010 | IL7R     | 0.81  | -0.18 | 0.43  | 1.08  | 0.80  | 1.19  | -0.78 | 0.74  | 2.50  | 0.59  | -1.13 | 1.39  |
| 16986203 | HEXB     | -1.52 | -1.55 | -0.90 | -0.62 | -1.22 | -1.12 | -0.89 | -0.69 | -0.37 | -1.41 | -1.76 | -1.05 |
| 16988537 | .        | -1.19 | -5.16 | -3.99 | -1.31 | -0.56 | -1.46 | 0.68  | -2.07 | -3.81 | -0.09 | -1.96 | -1.14 |
| 16990120 | .        | -0.62 | 0.86  | -0.84 | -0.05 | 0.05  | -0.83 | -1.74 | -1.36 | 3.23  | -0.95 | -7.16 | -1.16 |
| 16990127 | .        | -0.23 | -0.69 | 0.28  | -0.52 | -0.63 | -0.88 | -1.00 | -0.07 | -0.62 | -0.15 | -2.49 | -1.00 |
| 16990132 | .        | 0.49  | -0.62 | 0.33  | 0.63  | -0.56 | -1.72 | -5.38 | -0.72 | -1.14 | -0.80 | -4.62 | 2.77  |
| 16990136 | .        | -1.45 | -0.83 | -0.05 | 0.61  | -0.40 | 1.55  | -2.15 | -1.31 | 1.43  | 0.15  | -0.12 | -1.69 |
| 16993416 | .        | -0.80 | -0.88 | 0.01  | -0.13 | 0.10  | 0.04  | -0.05 | 0.51  | -1.07 | 0.00  | -2.78 | -0.24 |
| 16993420 | .        | -0.08 | -0.87 | -0.34 | -0.13 | -0.53 | 1.05  | -1.37 | -1.00 | -0.20 | -0.77 | -3.60 | 1.19  |
| 16993421 | .        | -0.72 | -0.85 | 0.14  | -0.62 | 0.28  | -0.21 | 0.34  | -0.47 | -0.78 | -0.53 | -2.84 | 0.28  |
| 16993422 | .        | 0.62  | -0.97 | 0.01  | -0.06 | 0.40  | -0.28 | 0.50  | -0.90 | -0.34 | -0.77 | -6.38 | -0.26 |
| 16993424 | .        | -0.62 | -1.06 | -0.70 | 0.73  | 0.34  | 0.33  | 0.13  | -0.09 | 1.05  | -0.28 | -3.87 | -0.30 |
| 16993430 | .        | -0.98 | -1.12 | -0.09 | -0.30 | 0.13  | 0.47  | 0.44  | -1.04 | -0.03 | -0.44 | -4.70 | -0.66 |
| 16995601 | FYB      | -0.59 | -0.36 | -0.85 | -1.16 | -1.55 | -0.77 | -0.19 | -0.64 | -0.37 | -1.06 | -2.88 | -1.78 |
| 16995866 | FLJ32255 | 0.91  | 1.64  | -0.18 | 0.57  | 0.93  | 0.80  | -0.78 | -0.39 | 1.54  | 1.95  | -1.90 | 0.08  |
| 16996813 | CD180    | -3.04 | -2.52 | -1.83 | -2.04 | -2.38 | -2.44 | -0.74 | -2.66 | -3.84 | -3.50 | -2.91 | -0.61 |
| 16996983 | NAIP     | -1.62 | -1.48 | -1.35 | -1.40 | -2.08 | -0.23 | -0.07 | -0.76 | -3.03 | -1.58 | -2.56 | -0.03 |
| 16997644 | .        | -1.49 | 1.04  | 1.45  | -1.15 | -1.56 | 0.25  | -2.12 | 1.36  | -4.01 | -1.54 | 0.42  | -4.24 |
| 16997919 | .        | -2.25 | -3.47 | 0.37  | -1.60 | 1.84  | 0.55  | 0.36  | -0.22 | 4.01  | 3.67  | 0.96  | 1.56  |
| 16999776 | IRF1     | 1.79  | 2.01  | 2.32  | 2.41  | 2.61  | 0.50  | 2.92  | 0.13  | 2.93  | 2.02  | 0.12  | 0.97  |
| 17000485 | HSPA9    | 0.59  | 0.40  | 0.62  | 0.51  | 0.71  | 0.45  | -0.30 | -0.42 | 0.96  | 0.63  | -1.63 | 0.58  |
| 17001545 | CSF1R    | -1.73 | -1.64 | -0.81 | -0.30 | -1.67 | 0.60  | -0.33 | 0.33  | -2.00 | -0.75 | -4.01 | 0.26  |
| 17004518 | LY86     | -1.75 | -1.67 | -2.48 | -2.34 | -0.66 | 0.01  | 0.06  | -3.66 | -3.79 | -1.49 | -2.73 | -0.60 |
| 17005001 | CD83     | 1.81  | 1.80  | 2.27  | 1.75  | 2.25  | 0.43  | 1.06  | 0.79  | 2.60  | 1.73  | 0.92  | 0.89  |
| 17005569 | HIST1H1E | 0.62  | 0.39  | -0.62 | 0.42  | -0.23 | 1.96  | 0.52  | 1.30  | 0.50  | 1.00  | -3.67 | 0.63  |
| 17006296 | .        | 0.90  | 0.16  | 0.80  | 1.12  | 0.06  | 1.73  | 0.52  | 0.45  | 0.20  | 0.88  | -5.05 | -1.45 |
| 17006297 | .        | -0.01 | -0.81 | 0.69  | -1.17 | -0.17 | 6.52  | 3.57  | 0.79  | 2.06  | -0.60 | -3.64 | 0.38  |
| 17006304 | .        | -0.29 | 1.06  | -0.70 | 0.92  | 1.04  | -1.59 | -4.16 | 0.33  | 2.92  | -2.01 | -1.12 | -1.86 |
| 17006307 | .        | -0.17 | -1.63 | -0.71 | -0.27 | 0.94  | -2.08 | -0.91 | 1.43  | -0.85 | -0.66 | -6.57 | -2.57 |
| 17006319 | .        | -1.24 | 0.52  | 2.00  | 2.32  | 1.70  | -0.45 | 0.05  | -0.07 | 2.22  | 3.05  | -3.13 | 2.24  |
| 17006659 | TNF      | 4.54  | 4.76  | 3.80  | 3.84  | 6.45  | 2.56  | -0.15 | 3.00  | 5.27  | 4.43  | 1.96  | 1.55  |
| 17006683 | AIF1     | -1.23 | -0.86 | -1.26 | -1.00 | -1.65 | -0.27 | -0.36 | -0.24 | -1.11 | -0.88 | -0.38 | 0.02  |
| 17009218 | .        | 1.49  | 0.57  | -0.34 | 0.71  | 1.70  | 0.05  | -0.36 | 0.20  | 0.52  | 1.85  | -1.45 | -0.70 |
| 17011939 | FAM26F   | 2.57  | 1.89  | 0.44  | 0.91  | 2.68  | 0.56  | 1.37  | -0.69 | 3.80  | 3.38  | 3.16  | 2.10  |
| 17012946 | TNFAIP3  | 1.49  | 1.06  | 1.69  | 0.68  | 1.92  | 0.92  | 0.06  | 1.54  | 1.77  | 1.33  | -1.19 | 0.26  |
| 17016503 | HIST1H3I | 0.50  | 0.91  | 0.27  | -0.68 | 0.78  | 0.78  | 3.64  | 0.38  | 3.26  | 2.38  | -6.03 | 0.21  |
| 17017018 | IER3     | 2.30  | 2.22  | 2.54  | 3.46  | 3.00  | 2.12  | 0.56  | 3.32  | 2.48  | 3.18  | -0.49 | 1.99  |
| 17017178 | .        | -1.10 | -1.07 | 0.39  | -0.81 | 0.76  | -1.33 | -2.42 | -1.97 | 4.01  | 0.44  | -5.72 | 2.69  |
| 17017188 | .        | -0.82 | 0.19  | 0.10  | -0.14 | 0.56  | -0.26 | -0.25 | -0.66 | -1.33 | 1.26  | -6.34 | -0.72 |
| 17017192 | .        | -1.34 | -0.32 | -1.02 | -0.20 | 0.00  | -1.04 | 0.33  | -0.35 | -0.87 | 2.03  | -5.08 | -0.55 |
| 17017193 | .        | -0.63 | 0.25  | -0.96 | 0.68  | 0.87  | -0.62 | 0.61  | -0.02 | -0.85 | 2.01  | -2.15 | -1.34 |
| 17017979 | TAP1     | 1.67  | 0.98  | 1.06  | 0.93  | 1.49  | 0.84  | 0.79  | -0.09 | 1.84  | 1.73  | 0.10  | 1.48  |
| 17019728 | PLA2G7   | -0.84 | -0.65 | -0.24 | 0.01  | -0.80 | -0.09 | -0.25 | -0.27 | -0.69 | -0.67 | -0.63 | 0.06  |
| 17022357 | .        | -0.64 | -0.96 | -0.07 | -0.62 | -1.52 | 1.16  | -3.07 | -0.13 | -0.02 | 1.49  | -6.16 | 1.60  |
| 17022949 | .        | 2.54  | 2.84  | 1.91  | 1.24  | 2.88  | -0.98 | 3.10  | -0.54 | 3.02  | 1.88  | 5.57  | 3.10  |
| 17026267 | .        | 4.82  | 4.72  | 4.07  | 3.95  | 6.74  | 2.67  | 0.15  | 3.11  | 5.79  | 4.80  | -0.04 | 1.84  |
| 17027144 | .        | 1.67  | 0.98  | 1.06  | 0.93  | 1.49  | 0.84  | 0.79  | -0.09 | 1.84  | 1.73  | 0.10  | 1.48  |
| 17027794 | .        | 4.54  | 4.76  | 3.80  | 3.84  | 6.45  | 2.56  | -0.15 | 3.00  | 5.27  | 4.43  | 1.96  | 1.55  |
| 17027817 | .        | -1.23 | -0.86 | -1.26 | -1.00 | -1.65 | -0.27 | -0.36 | -0.24 | -1.11 | -0.88 | -0.38 | 0.02  |
| 17028326 | .        | 0.63  | -0.23 | 0.66  | 0.24  | -0.04 | 0.83  | 1.27  | 0.02  | 0.79  | 0.72  | -0.64 | 1.17  |
| 17028909 | .        | 2.11  | 2.03  | 2.45  | 3.22  | 2.82  | 1.86  | 0.50  | 3.19  | 2.38  | 2.82  | -0.04 | 2.04  |
| 17029788 | .        | 1.67  | 0.98  | 1.06  | 0.93  | 1.49  | 0.84  | 0.79  | -0.09 | 1.84  | 1.73  | 0.10  | 1.48  |
| 17030620 | .        | 4.54  | 4.76  | 3.80  | 3.84  | 6.45  | 2.56  | -0.15 | 3.00  | 5.27  | 4.43  | 1.96  | 1.55  |
| 17030643 | .        | -1.19 | -0.89 | -1.28 | -1.03 | -1.66 | -0.27 | -0.35 | -0.23 | -1.07 | -0.85 | -0.77 | 0.01  |

|          |              |       |       |       |       |       |       |       |       |       |       |       |       |
|----------|--------------|-------|-------|-------|-------|-------|-------|-------|-------|-------|-------|-------|-------|
| 17031687 | .            | 2.11  | 2.03  | 2.45  | 3.22  | 2.82  | 1.86  | 0.50  | 3.19  | 2.38  | 2.82  | -0.04 | 2.04  |
| 17032476 | .            | 1.67  | 0.98  | 1.06  | 0.93  | 1.49  | 0.84  | 0.79  | -0.09 | 1.84  | 1.73  | 0.10  | 1.48  |
| 17033337 | .            | 4.54  | 4.76  | 3.80  | 3.84  | 6.45  | 2.56  | -0.15 | 3.00  | 5.27  | 4.43  | 1.96  | 1.55  |
| 17034143 | .            | 2.11  | 2.03  | 2.45  | 3.22  | 2.82  | 1.86  | 0.50  | 3.19  | 2.38  | 2.82  | -0.04 | 2.04  |
| 17034791 | .            | 1.67  | 0.98  | 1.06  | 0.93  | 1.49  | 0.84  | 0.79  | -0.09 | 1.84  | 1.73  | 0.10  | 1.48  |
| 17034947 | .            | -1.38 | 0.89  | 0.19  | -0.32 | -0.15 | -0.10 | -2.54 | 1.74  | -0.14 | 1.51  | -4.55 | 2.64  |
| 17035418 | .            | 4.54  | 4.76  | 3.80  | 3.84  | 6.45  | 2.56  | -0.15 | 3.00  | 5.27  | 4.43  | 1.96  | 1.55  |
| 17035441 | .            | -1.11 | -0.93 | -1.26 | -1.09 | -1.66 | -0.22 | -0.32 | -0.33 | -0.93 | -0.83 | -0.12 | -0.01 |
| 17037271 | .            | 1.67  | 0.98  | 1.06  | 0.93  | 1.49  | 0.84  | 0.79  | -0.09 | 1.84  | 1.73  | 0.10  | 1.48  |
| 17038117 | .            | 4.54  | 4.76  | 3.80  | 3.84  | 6.45  | 2.56  | -0.15 | 3.00  | 5.27  | 4.43  | 1.96  | 1.55  |
| 17038140 | .            | -1.23 | -0.86 | -1.26 | -1.00 | -1.65 | -0.27 | -0.36 | -0.24 | -1.11 | -0.88 | -0.38 | 0.02  |
| 17038297 | .            | 1.08  | 0.75  | 1.13  | 0.66  | 1.36  | -0.62 | 0.54  | 0.48  | 0.56  | 0.99  | -1.97 | 0.29  |
| 17039184 | .            | 2.23  | 2.03  | 2.48  | 3.48  | 2.99  | 2.06  | 0.54  | 3.19  | 2.43  | 2.98  | -0.40 | 1.99  |
| 17039977 | .            | 1.67  | 0.98  | 1.06  | 0.93  | 1.49  | 0.84  | 0.79  | -0.09 | 1.84  | 1.73  | 0.10  | 1.48  |
| 17040712 | .            | 4.54  | 4.76  | 3.80  | 3.84  | 6.45  | 2.56  | -0.15 | 3.00  | 5.27  | 4.43  | 1.96  | 1.55  |
| 17040735 | .            | -1.23 | -0.86 | -1.26 | -1.00 | -1.65 | -0.27 | -0.36 | -0.24 | -1.11 | -0.88 | -0.38 | 0.02  |
| 17041752 | .            | 2.11  | 2.03  | 2.45  | 3.22  | 2.82  | 1.86  | 0.50  | 3.19  | 2.38  | 2.82  | -0.04 | 2.04  |
| 17044253 | GPNMB        | -4.07 | -3.70 | -3.21 | -3.23 | -2.49 | -2.14 | -0.57 | -2.92 | -3.14 | -2.65 | -3.73 | -2.29 |
| 17044432 | .            | -0.81 | 1.21  | 0.54  | 0.20  | -0.48 | 1.51  | -0.15 | -0.84 | 1.38  | 0.11  | -2.06 | 1.57  |
| 17044438 | .            | -0.63 | -0.06 | -1.36 | 0.07  | -1.12 | -0.22 | -0.10 | -0.69 | 0.69  | -0.19 | -2.58 | -0.59 |
| 17046911 | NCF1B        | 0.94  | 1.90  | 1.43  | 0.74  | 0.82  | 1.96  | 1.40  | 0.98  | 1.30  | 2.08  | 2.01  | 1.64  |
| 17047459 | SNORA14A     | -0.73 | -0.91 | -0.25 | -0.76 | -0.73 | 0.85  | -0.31 | -1.48 | -0.81 | -0.39 | -2.11 | -0.85 |
| 17055786 | LOC541472    | 6.61  | 4.93  | 4.29  | 3.24  | 6.11  | 2.42  | 1.59  | 5.40  | 5.21  | 5.86  | 0.05  | 2.50  |
| 17056984 | INHBA        | 5.60  | 5.74  | 6.07  | 5.66  | 6.29  | 4.05  | 0.36  | 6.00  | 5.79  | 5.63  | 2.85  | 3.80  |
| 17057035 | PSMA2        | 0.63  | 0.69  | 0.26  | 0.45  | 0.86  | 0.56  | 0.50  | -0.60 | 0.86  | 0.37  | -0.75 | -0.12 |
| 17058719 | NCF1C        | 1.21  | 2.01  | 0.73  | 0.91  | 1.70  | 3.26  | 2.15  | 0.97  | 1.12  | 2.46  | -1.93 | 1.79  |
| 17061125 | RASA4B       | -4.04 | 2.58  | -4.46 | -1.88 | 0.13  | 0.62  | -1.09 | -1.79 | -2.94 | -1.95 | -0.34 | -4.67 |
| 17063722 | CLEC5A       | 1.87  | 0.73  | 2.16  | 3.03  | 2.27  | 1.35  | -1.11 | 4.05  | 3.79  | 2.65  | -1.46 | 1.52  |
| 17066961 | ADAMDEC1     | 0.74  | 0.92  | 0.83  | 0.29  | -0.46 | 2.37  | 0.06  | 1.27  | 1.44  | 0.39  | -0.46 | 2.57  |
| 17068296 | IDO1         | 5.30  | 4.69  | 4.19  | 3.24  | 4.03  | -0.06 | 1.89  | 2.21  | 5.93  | 4.59  | 3.28  | 1.32  |
| 17068317 | .            | 6.18  | 5.02  | 6.09  | 3.18  | 6.00  | 0.15  | 0.39  | 3.90  | 7.08  | 5.54  | 8.03  | 3.15  |
| 17068606 | .            | -4.27 | -1.62 | -0.65 | -1.19 | -0.54 | 2.57  | -1.10 | 0.79  | 0.44  | -1.80 | -3.72 | -2.13 |
| 17068624 | .            | -1.21 | -0.72 | -0.82 | -1.13 | 0.61  | 0.20  | 2.55  | 0.57  | 1.10  | 0.06  | -4.87 | 0.41  |
| 17068633 | .            | -0.60 | -0.23 | -0.40 | -0.48 | -0.64 | 1.24  | -0.50 | -0.94 | -0.89 | -1.00 | 0.95  | -0.15 |
| 17069063 | LYN          | 0.54  | 1.02  | 0.90  | 0.88  | 0.10  | 1.82  | 0.49  | 0.82  | 0.63  | 1.46  | -1.22 | 1.09  |
| 17074721 | .            | -1.11 | 3.51  | 1.57  | 4.42  | 4.13  | 3.00  | 2.93  | -1.67 | -1.37 | 2.53  | 1.44  | 3.62  |
| 17081297 | .            | -0.91 | 0.01  | -1.31 | -0.49 | -1.28 | -0.36 | -1.56 | -0.62 | -0.24 | -1.05 | 1.66  | -0.82 |
| 17083229 | .            | 0.91  | 1.21  | -0.55 | -0.10 | 0.87  | -1.20 | -1.52 | -0.14 | -1.54 | -0.88 | -1.11 | -0.51 |
| 17083357 | CD274        | 5.43  | 4.24  | 4.74  | 4.75  | 3.54  | 0.67  | 1.72  | 3.35  | 5.49  | 4.26  | 1.75  | 2.06  |
| 17097052 | TXN          | 1.51  | 1.51  | 1.17  | 1.15  | 1.97  | 0.92  | 0.66  | 0.68  | 1.33  | 1.31  | 1.17  | 0.77  |
| 17097643 | TNFSF15      | 3.28  | 5.43  | 5.58  | 4.88  | 5.79  | 1.42  | 3.83  | 4.40  | 5.20  | 4.06  | 1.18  | 2.18  |
| 17099707 | FCN1         | -2.93 | -2.43 | -1.74 | -1.31 | -1.28 | -0.82 | -2.06 | -2.55 | -2.47 | -2.31 | -1.49 | -0.60 |
| 17100655 | .            | -1.23 | -1.27 | 0.34  | 0.33  | -1.04 | 0.50  | 0.04  | -2.52 | 0.77  | -0.28 | 0.64  | -0.91 |
| 17101111 | IL3RA        | 3.12  | 2.32  | 3.35  | 3.29  | 3.76  | 2.89  | 0.85  | 2.22  | 4.66  | 3.83  | 0.00  | 3.71  |
| 17104675 | .            | -0.70 | -1.47 | 0.89  | 0.76  | 0.98  | -0.55 | 3.83  | -1.34 | 6.28  | 1.79  | -4.36 | 0.04  |
| 17104678 | .            | -0.07 | -0.51 | -0.03 | -0.31 | 0.40  | 0.19  | 0.75  | 0.53  | 2.44  | 2.27  | -1.25 | 1.44  |
| 17104683 | .            | 1.36  | -0.76 | -1.08 | 0.04  | -1.39 | 0.82  | -0.29 | -0.27 | 1.51  | -0.09 | -2.90 | 0.63  |
| 17104684 | .            | 1.71  | -0.61 | -0.60 | -0.03 | -1.04 | 2.04  | -1.47 | -0.45 | 1.50  | 0.37  | -8.14 | -0.21 |
| 17114697 | .            | 0.98  | 0.99  | -1.42 | -0.74 | -0.45 | 0.14  | -0.23 | -0.18 | 0.49  | -2.01 | 1.67  | -0.81 |
| 17115692 | MPP1         | -1.53 | -1.85 | -2.10 | -1.66 | -2.42 | -1.02 | -0.48 | -1.75 | -1.25 | -1.56 | -3.10 | -1.82 |
| 17115868 | IL3RA        | 3.10  | 2.58  | 3.35  | 3.27  | 3.82  | 2.68  | 0.86  | 2.21  | 3.92  | 3.91  | -0.13 | 3.66  |
| 17115925 | CD99         | -1.16 | -1.06 | -0.84 | -1.11 | -1.02 | -0.52 | -0.75 | -0.37 | -1.11 | 0.31  | -3.13 | -0.78 |
| 17117453 | .            | 0.59  | 0.34  | 0.34  | 0.59  | 0.62  | 0.77  | -0.28 | 1.25  | 1.20  | 0.84  | -2.82 | 1.93  |
| 17117680 | .            | -0.59 | -0.66 | 0.09  | -0.34 | -0.20 | -0.48 | -1.58 | -0.10 | 0.05  | 0.31  | -3.93 | -0.86 |
| 17117736 | .            | 3.85  | 4.50  | 3.14  | 2.74  | 2.40  | 4.93  | -0.17 | 4.03  | 5.50  | 4.94  | 2.67  | 3.61  |
| 17117867 | .            | -3.95 | -3.56 | -0.67 | -2.38 | -1.43 | -2.19 | 0.30  | -2.12 | -2.59 | -1.73 | -3.65 | -1.47 |
| 17118001 | BRK1         | -0.59 | -0.98 | -0.21 | 0.12  | -0.43 | -1.00 | 0.87  | -0.81 | 1.96  | -0.18 | -1.42 | -1.30 |
| 17118058 | LOC728093    | -2.00 | -0.95 | -5.48 | -1.13 | -4.84 | -3.40 | -0.21 | -1.02 | -3.97 | -2.11 | -0.79 | 0.13  |
| 17118066 | LOC441081    | -2.00 | -0.95 | -5.48 | -1.13 | -4.84 | -3.40 | -0.21 | -1.02 | -3.97 | -2.11 | -0.79 | 0.13  |
| 17118068 | .            | -1.76 | -1.08 | -4.34 | -0.95 | -4.12 | -2.75 | -0.34 | -0.60 | -3.42 | -1.73 | -0.43 | 0.16  |
| 17118104 | .            | -2.00 | -0.95 | -5.48 | -1.13 | -4.84 | -3.40 | -0.21 | -1.02 | -3.97 | -2.11 | -0.79 | 0.13  |
| 17118127 | LOC102724994 | -2.00 | -0.95 | -5.48 | -1.13 | -4.84 | -3.40 | -0.21 | -1.02 | -3.97 | -2.11 | -0.79 | 0.13  |
| 17118144 | .            | -2.57 | -3.10 | -1.73 | -0.72 | -3.74 | -1.28 | -2.30 | -0.76 | -2.62 | -1.89 | -4.96 | -1.82 |



|          |   |       |       |       |       |       |       |       |       |       |       |       |       |
|----------|---|-------|-------|-------|-------|-------|-------|-------|-------|-------|-------|-------|-------|
| 17118269 | . | 2.80  | 1.90  | 3.39  | 2.67  | 1.89  | 2.14  | 0.32  | 2.22  | 2.30  | 2.74  | 3.02  | 2.90  |
| 17120642 | . | -1.26 | -0.42 | -0.78 | -0.65 | 0.94  | -0.20 | -0.42 | 0.20  | -1.31 | -0.14 | -1.75 | 1.11  |
| 17120866 | . | -1.87 | -0.04 | 0.71  | -0.05 | -1.37 | 0.14  | -0.17 | 0.61  | -1.09 | -0.28 | -3.73 | -2.49 |
| 17121252 | . | -1.01 | -0.23 | -0.15 | -0.01 | -0.11 | 0.02  | 0.09  | -0.67 | 1.13  | 0.37  | -2.45 | 0.89  |
| 17121378 | . | -0.37 | -1.06 | 0.32  | -0.08 | 0.53  | -0.74 | 0.59  | -0.33 | 1.88  | 0.15  | -3.18 | -0.75 |
| 17121380 | . | -0.41 | -1.74 | 0.67  | -0.08 | 0.61  | -1.43 | 1.10  | -0.22 | 1.53  | 0.31  | -2.95 | -0.80 |
| 17121504 | . | -0.65 | -1.52 | 1.20  | -0.11 | 0.45  | -2.02 | 0.91  | -0.06 | 1.03  | 0.69  | -2.50 | -0.27 |
| 17121622 | . | -0.80 | -0.60 | -1.34 | -0.25 | 0.21  | 0.82  | -1.00 | -1.58 | -1.43 | -0.52 | -1.00 | 0.08  |
| 17121624 | . | -0.80 | -0.60 | -1.37 | -0.20 | 0.23  | 0.89  | -0.92 | -1.56 | -1.55 | -0.50 | -1.00 | 0.05  |
| 17122488 | . | 1.61  | 2.52  | 0.12  | 0.47  | 3.40  | -0.68 | 0.25  | 0.05  | 5.40  | 2.38  | -3.63 | 0.43  |
| 17122504 | . | 0.59  | 1.43  | 1.77  | 0.47  | 2.21  | -0.27 | -1.11 | 0.69  | 0.98  | 1.07  | -2.01 | -0.23 |
| 17122506 | . | 0.99  | 1.65  | 0.74  | 0.68  | 1.76  | -0.04 | -0.35 | 1.49  | 1.60  | 0.80  | -0.16 | 1.52  |
| 17122508 | . | 1.01  | 1.63  | 0.88  | 0.74  | 1.61  | 0.07  | -0.08 | 1.42  | 1.66  | 0.87  | -0.13 | 1.44  |
| 17122638 | . | 1.45  | -1.08 | 0.63  | -1.72 | -0.10 | -2.35 | -1.53 | 0.03  | 1.13  | -1.18 | -1.83 | 1.27  |
| 17123206 | . | -0.03 | 0.00  | 0.01  | 0.61  | 1.04  | 1.31  | -0.84 | -0.38 | -1.22 | 1.50  | -4.62 | 2.24  |
| 17124068 | . | -2.04 | -2.24 | -2.48 | -1.96 | -2.38 | -1.80 | -0.71 | -0.61 | -2.67 | -1.50 | -3.23 | -1.69 |
| 17124274 | . | 0.46  | -1.56 | -0.63 | -0.31 | 0.06  | -2.18 | 0.69  | -0.23 | -1.69 | -1.27 | -2.51 | 0.73  |
| 17124336 | . | -2.50 | -0.75 | 0.40  | -1.22 | -1.26 | -1.63 | 0.54  | -0.59 | 4.11  | -4.48 | -1.01 | 1.44  |
| 17124748 | . | 1.76  | -0.77 | 1.33  | 0.67  | 1.54  | 1.15  | -0.25 | 0.04  | 2.12  | 0.68  | -3.90 | -0.61 |
| 17125294 | . | -0.79 | -0.14 | -0.32 | -0.33 | -0.35 | -2.05 | 0.13  | -1.87 | 0.68  | -1.90 | -1.61 | 0.37  |
| 17126000 | . | 0.52  | -0.59 | -2.36 | 1.64  | 0.69  | -1.90 | 1.61  | 0.49  | 3.70  | 2.33  | -4.60 | -0.06 |
| 17126024 | . | 1.02  | -0.86 | 1.37  | -0.01 | 0.03  | 0.62  | 1.27  | 0.18  | -0.24 | 0.17  | -1.49 | 2.61  |
| 17126032 | . | -1.97 | -2.09 | -1.13 | -1.14 | -1.63 | -0.10 | 0.59  | -0.93 | -1.32 | -1.66 | -0.22 | -0.64 |
| 17126050 | . | -1.08 | -0.71 | -0.60 | -1.03 | -0.79 | 0.43  | 0.38  | -0.64 | -0.97 | 0.18  | -2.56 | -0.56 |
| 17126052 | . | -0.32 | -0.51 | 0.36  | 0.50  | 0.75  | -1.93 | -0.90 | 0.16  | 1.74  | -0.59 | -1.82 | 0.83  |
| 17126142 | . | -1.97 | -2.09 | -1.13 | -1.14 | -1.63 | -0.10 | 0.59  | -0.93 | -1.32 | -1.66 | -0.22 | -0.64 |
| 17126152 | . | -0.75 | -0.43 | 0.14  | 0.81  | 0.12  | -0.06 | 0.56  | 0.68  | 1.81  | 0.02  | -2.74 | 1.16  |
| 17126156 | . | -1.08 | -0.71 | -0.60 | -1.03 | -0.79 | 0.43  | 0.38  | -0.64 | -0.97 | 0.18  | -2.56 | -0.56 |
| 17126162 | . | -0.32 | -0.51 | 0.36  | 0.50  | 0.75  | -1.93 | -0.90 | 0.16  | 1.74  | -0.59 | -1.82 | 0.83  |

## Supplementary Table 4B. Differentially expressed genes based on transcriptomic data for PBMCs exposed to Tw.

| Probe_Id | Genes        | C1    | C2    | HET1  | HET2  | HET3  | P1    | P2    | P3    | WT1   | WT2   | WT3   | WT4   |
|----------|--------------|-------|-------|-------|-------|-------|-------|-------|-------|-------|-------|-------|-------|
| 16650647 | .            | -1.33 | -0.08 | 0.55  | -0.11 | -0.02 | -2.39 | -0.06 | -1.93 | -3.58 | 1.55  | -1.81 | 0.97  |
| 16651905 | .            | -3.30 | -1.32 | -4.44 | -3.02 | -0.38 | -4.24 | 2.57  | -1.24 | 2.04  | -4.76 | 0.66  | -0.25 |
| 16652101 | .            | 3.55  | 0.82  | 1.69  | 0.39  | 0.57  | 1.08  | 1.50  | 4.45  | 4.90  | -7.55 | 2.40  | -2.41 |
| 16653707 | .            | 1.66  | -2.88 | 1.37  | 0.85  | 2.59  | 0.10  | 1.68  | 4.39  | 1.30  | -4.11 | 4.95  | -4.14 |
| 16653785 | .            | 0.70  | -1.66 | 1.17  | 1.36  | 0.46  | -0.94 | -1.24 | 0.06  | 1.01  | 0.99  | -1.47 | 0.50  |
| 16653795 | .            | -0.84 | 0.53  | -0.75 | 0.54  | 0.60  | 1.73  | 0.50  | 0.93  | -1.21 | 1.45  | 0.25  | -1.17 |
| 16654693 | .            | -3.80 | -0.07 | 1.15  | 2.22  | -2.32 | -0.34 | -1.92 | -0.22 | 3.08  | -1.70 | -0.15 | -0.72 |
| 16657037 | .            | 0.01  | 1.67  | 1.22  | -0.76 | 0.72  | -7.52 | 2.28  | -0.23 | 6.56  | 1.54  | -2.14 | 1.97  |
| 16658933 | .            | 0.23  | -1.09 | -0.49 | 0.86  | 0.39  | -0.36 | -1.57 | 0.83  | 0.65  | 2.11  | 0.62  | 2.68  |
| 16658936 | .            | 0.74  | -0.63 | 0.17  | 0.44  | 0.02  | 2.56  | 0.29  | -0.22 | 0.10  | -0.39 | 0.94  | 1.50  |
| 16663808 | .            | -1.39 | -0.36 | 0.24  | -0.32 | 0.93  | 1.17  | 0.26  | -0.38 | 1.51  | 1.00  | 0.04  | -0.61 |
| 16678342 | .            | -0.62 | -0.08 | 0.17  | -1.41 | 1.25  | -2.67 | 2.38  | -0.03 | 1.12  | -0.22 | -0.89 | -1.08 |
| 16693644 | .            | -0.59 | -0.96 | -0.24 | -1.15 | -0.34 | 1.08  | 1.30  | -0.37 | 2.18  | 0.68  | -1.63 | 0.10  |
| 16699512 | .            | 2.81  | -4.16 | -0.78 | -0.25 | 3.93  | -1.86 | 0.65  | 2.14  | -0.19 | -3.01 | 0.87  | -1.12 |
| 16718373 | .            | 1.11  | -0.90 | -0.71 | 0.97  | -0.29 | -0.28 | 0.09  | 1.08  | 2.59  | 1.38  | 0.12  | 1.89  |
| 16732028 | LOC105369519 | -0.87 | -0.95 | -0.05 | -0.08 | 0.34  | -2.11 | 0.07  | 1.72  | 1.87  | 0.34  | 0.77  | -2.22 |
| 16735142 | .            | 1.96  | 1.67  | 1.19  | 0.09  | -0.91 | -0.32 | 0.84  | 2.57  | 3.55  | 1.15  | -2.65 | -1.28 |
| 16735819 | .            | -0.74 | -0.89 | -0.26 | 0.16  | 0.12  | 0.56  | -0.32 | 0.72  | 0.73  | 1.13  | -0.18 | 1.12  |
| 16735835 | .            | 0.42  | 0.80  | 0.41  | 2.54  | -2.38 | -0.73 | 4.84  | 4.26  | -3.65 | -1.97 | 0.38  | 4.69  |
| 16740560 | .            | -0.65 | -0.50 | 0.36  | 0.36  | 0.42  | 0.18  | -0.56 | 0.04  | 0.64  | 0.80  | 0.74  | 0.34  |
| 16745154 | .            | 0.82  | -0.82 | -0.53 | 0.47  | 0.09  | 0.07  | 0.02  | -0.29 | 1.86  | -0.23 | -0.56 | 3.40  |
| 16747336 | SCARNA10     | 0.89  | 0.29  | -0.70 | 0.02  | 0.37  | -0.20 | 1.30  | 0.51  | 0.84  | -1.44 | 0.04  | -0.73 |
| 16751995 | .            | 1.36  | -2.10 | 2.56  | -4.08 | 4.43  | -1.29 | 0.09  | -0.67 | -1.04 | 1.41  | -1.30 | -0.67 |
| 16752007 | .            | -1.31 | 0.81  | 2.90  | 0.16  | 0.06  | 1.62  | 0.99  | 1.68  | 5.58  | -0.33 | 1.62  | 0.74  |
| 16755523 | .            | 0.31  | -0.83 | 0.42  | -0.15 | 0.01  | 1.03  | -0.72 | 0.45  | 1.96  | -0.21 | -0.67 | 1.73  |
| 16764077 | .            | -1.27 | -0.56 | 1.04  | 0.92  | 0.06  | -3.16 | -0.61 | 0.90  | 1.92  | -0.31 | -2.67 | 3.99  |
| 16769725 | .            | -1.53 | 1.81  | -0.92 | 1.44  | 0.83  | 0.60  | -4.09 | -0.76 | -1.59 | -2.26 | 0.22  | -4.09 |
| 16769727 | .            | -1.29 | -0.47 | 0.85  | 0.31  | -0.81 | 1.14  | -1.04 | 1.92  | -0.76 | -1.15 | -0.82 | -2.14 |
| 16769728 | .            | -0.82 | -0.86 | -0.88 | 1.73  | -0.24 | -1.92 | 0.43  | 1.42  | -1.79 | 0.98  | -2.09 | 5.19  |
| 16769749 | .            | -0.08 | -1.03 | -0.02 | 0.08  | 0.05  | -1.87 | 0.24  | 1.35  | 2.11  | -0.24 | -0.97 | -0.98 |
| 16769758 | .            | -1.16 | -0.62 | 2.16  | 0.87  | 2.15  | -3.75 | -5.68 | -0.53 | 4.47  | 1.98  | -1.91 | 1.08  |
| 16771317 | .            | -0.17 | 0.94  | -0.85 | 1.09  | 0.82  | 0.77  | 0.40  | 1.40  | 7.33  | 1.29  | -1.83 | -0.35 |
| 16771492 | .            | -2.11 | -1.93 | 2.03  | -0.28 | 2.37  | -1.87 | -1.29 | 0.65  | -1.90 | 2.48  | -0.82 | 1.43  |
| 16771510 | .            | 0.12  | 1.16  | -1.12 | 0.11  | 0.48  | 0.36  | 1.84  | 0.36  | 1.62  | 0.60  | 0.58  | -1.99 |
| 16771559 | .            | -0.83 | -1.76 | -1.80 | -1.22 | 1.40  | -1.97 | -1.07 | 0.36  | 5.80  | 0.65  | -1.56 | 2.13  |
| 16790473 | .            | 0.05  | 0.18  | -0.41 | -0.89 | 0.02  | -0.02 | 0.34  | -0.29 | 1.50  | 0.89  | -0.60 | -0.70 |
| 16794260 | .            | -0.73 | 0.02  | 0.44  | -0.29 | 0.13  | 2.22  | -1.34 | 0.99  | 3.21  | -0.75 | -0.05 | -1.39 |
| 16823043 | SNHG19       | 1.06  | 1.10  | 2.45  | 1.09  | -0.59 | -2.24 | 1.63  | -1.37 | -0.35 | 0.53  | -1.93 | -3.87 |
| 16823105 | .            | -0.81 | -0.88 | 0.29  | 0.15  | -0.40 | -0.17 | 0.54  | 1.89  | -0.49 | 0.85  | 1.71  | 1.00  |
| 16828270 | .            | -0.94 | 0.26  | 1.43  | 0.43  | 1.08  | -0.01 | -0.82 | 0.74  | 0.60  | -0.28 | 1.66  | 0.61  |
| 16828528 | .            | 0.89  | 0.85  | -0.50 | 0.61  | -0.03 | 1.40  | 1.07  | 0.45  | -0.20 | -0.31 | -0.95 | 0.94  |
| 16828531 | .            | 0.86  | 0.65  | -0.71 | 0.43  | 0.51  | 0.36  | 0.49  | 0.50  | 0.45  | -0.40 | -1.07 | 1.10  |
| 16835618 | .            | -0.06 | -1.07 | 1.66  | -1.36 | 1.43  | 0.22  | -0.67 | 0.93  | 5.53  | 1.56  | 1.60  | -2.34 |
| 16835641 | .            | 0.27  | 0.80  | -0.32 | -1.26 | -0.29 | 3.90  | 2.49  | -0.36 | 4.45  | 1.03  | -0.97 | 3.40  |
| 16836624 | MIR21        | -1.84 | -1.38 | 1.11  | -0.14 | 0.92  | -1.59 | -0.70 | -0.23 | 2.26  | -0.18 | 1.11  | -2.35 |
| 16839474 | .            | -0.41 | 0.72  | 0.63  | 0.24  | -0.24 | -1.83 | 1.61  | -0.53 | 0.80  | -0.87 | -0.74 | 1.92  |
| 16839477 | .            | -1.60 | -1.12 | 0.87  | 1.14  | 0.32  | -1.85 | 0.93  | 0.76  | -3.53 | -1.81 | -0.94 | -1.26 |
| 16839481 | .            | -0.87 | 0.53  | 0.79  | -0.25 | 0.90  | -3.50 | 0.23  | 1.03  | -1.21 | 0.61  | 1.17  | -1.64 |
| 16839489 | .            | -3.93 | 2.15  | 0.79  | -0.73 | 0.85  | -0.54 | -0.75 | 0.31  | 0.28  | 3.46  | 0.79  | 6.30  |
| 16839492 | .            | -1.45 | 0.68  | 0.23  | -0.63 | -0.34 | 3.09  | -0.36 | 0.85  | -1.72 | 0.45  | 0.73  | 4.71  |
| 16839494 | .            | 1.34  | -0.72 | -0.16 | 0.64  | 0.53  | 2.70  | 0.20  | -0.05 | -2.29 | 0.64  | -1.14 | 1.79  |
| 16839506 | .            | -2.63 | -1.15 | -0.16 | 0.23  | -0.17 | -2.67 | 0.88  | 0.39  | 1.14  | 1.61  | 1.37  | -1.63 |
| 16839513 | .            | -0.66 | -0.69 | -0.33 | -0.70 | 0.46  | -0.83 | -0.31 | 0.10  | 2.50  | 0.63  | 0.21  | -0.71 |
| 16839515 | .            | -0.84 | -1.14 | 1.71  | 0.05  | -0.53 | -0.92 | -0.26 | -0.16 | 3.09  | 0.91  | -1.13 | 0.19  |
| 16840589 | .            | -2.62 | 0.60  | 0.96  | 0.31  | 0.87  | 0.50  | -1.11 | 0.67  | -0.29 | 1.08  | -0.88 | -2.81 |
| 16842465 | .            | -2.74 | 2.06  | 2.24  | -0.96 | -0.86 | -1.72 | 0.23  | 3.34  | -2.64 | -2.61 | 2.33  | -2.14 |
| 16842466 | .            | -0.44 | 0.99  | 1.53  | -1.25 | -0.99 | -0.13 | 0.17  | 1.20  | -2.32 | -2.90 | 1.74  | -2.22 |
| 16847247 | .            | 3.41  | -2.06 | 1.77  | 2.75  | 2.02  | -0.87 | 0.89  | 1.19  | 5.20  | -0.68 | 1.46  | -2.23 |

|          |          |       |       |       |       |       |       |       |       |       |       |       |       |
|----------|----------|-------|-------|-------|-------|-------|-------|-------|-------|-------|-------|-------|-------|
| 16847319 | MIR4737  | -3.30 | -0.02 | 3.15  | -0.26 | 0.29  | -0.89 | 2.03  | -0.72 | 0.68  | -2.86 | -1.57 | -2.04 |
| 16852308 | SCARNA17 | -0.42 | 0.59  | -0.63 | 0.53  | -0.93 | -1.70 | -0.45 | -0.42 | -0.41 | -0.86 | 1.83  | -2.00 |
| 16857916 | .        | 0.26  | -0.04 | -1.28 | -0.25 | -0.27 | 1.02  | -0.13 | 0.21  | 1.39  | -1.05 | 0.85  | 2.06  |
| 16859821 | .        | -1.04 | -0.09 | -0.63 | 1.02  | 0.05  | -3.23 | 3.29  | 0.39  | 4.46  | -0.84 | 1.14  | -0.27 |
| 16859824 | .        | -0.71 | 0.99  | 0.14  | -1.48 | -0.60 | 4.68  | -1.09 | 3.43  | -1.33 | 0.65  | 1.18  | 3.24  |
| 16861887 | ECH1     | 0.62  | -0.24 | -0.28 | 0.45  | -0.62 | -0.61 | 2.38  | -0.23 | 1.02  | -0.50 | -0.87 | -0.67 |
| 16893456 | .        | 1.90  | -1.32 | 0.81  | 1.13  | 1.68  | -4.12 | -1.30 | 0.51  | 2.62  | 1.23  | -0.63 | 1.59  |
| 16898487 | .        | -1.05 | 0.70  | 3.24  | 2.82  | -0.75 | -2.79 | 2.73  | 0.68  | 0.17  | 1.84  | -4.70 | 1.84  |
| 16900096 | IGKC     | -0.59 | -0.81 | -1.13 | -0.18 | 0.98  | 3.37  | -0.41 | 1.39  | 1.21  | 0.79  | -0.17 | 1.06  |
| 16900461 | .        | 0.07  | -0.89 | -0.46 | -0.50 | 0.29  | 1.38  | 1.67  | -0.46 | 2.39  | 0.98  | 0.49  | -1.15 |
| 16900505 | .        | -1.06 | -0.26 | -1.54 | -0.65 | -0.46 | -1.06 | -0.80 | 0.94  | 1.20  | -0.93 | 1.62  | 0.33  |
| 16900506 | .        | -1.45 | -0.92 | -0.19 | -1.42 | 0.86  | -1.22 | 0.41  | 0.58  | 4.77  | 1.10  | 1.50  | 1.77  |
| 16900520 | .        | -0.61 | -1.03 | -1.21 | -0.36 | -0.17 | -0.20 | 1.49  | 0.58  | -0.69 | -0.67 | 0.71  | 1.57  |
| 16900530 | .        | -1.68 | 1.14  | 0.24  | -0.68 | 2.07  | -2.20 | 0.33  | 0.40  | -0.03 | -0.03 | -0.80 | -2.17 |
| 16915993 | PPDPF    | -1.08 | -1.23 | 0.64  | -0.25 | 0.08  | -0.38 | -0.21 | 0.11  | 0.65  | -0.31 | 0.59  | 1.68  |
| 16934240 | .        | -1.99 | -1.06 | 1.60  | -0.15 | 0.02  | -0.47 | -0.41 | 0.21  | -0.84 | -1.70 | -2.76 | -0.21 |
| 16934244 | .        | -1.55 | -1.79 | 1.61  | -0.59 | 0.14  | -0.64 | -0.66 | 0.42  | -1.39 | -2.41 | -3.01 | -0.05 |
| 16934245 | .        | -1.40 | -0.54 | -1.58 | -0.05 | 0.62  | -2.10 | -1.11 | 0.63  | -0.69 | -2.54 | -0.17 | -1.18 |
| 16934595 | .        | 1.34  | 1.26  | -0.80 | -1.78 | -0.39 | 1.70  | -0.39 | -0.09 | 4.87  | -5.23 | 1.27  | -7.36 |
| 16934598 | .        | 1.00  | -1.06 | 1.23  | -0.11 | 0.02  | 6.14  | -0.57 | -0.80 | 1.58  | -0.67 | -0.25 | 1.50  |
| 16934602 | .        | 0.04  | -1.33 | -0.04 | -0.07 | -0.47 | -2.96 | 0.30  | 0.86  | 2.09  | -0.62 | -0.19 | 0.81  |
| 16934603 | .        | 0.14  | -0.86 | 1.17  | -0.58 | -0.06 | -2.08 | 0.46  | 0.65  | 1.98  | -0.76 | -1.43 | -0.15 |
| 16961037 | SCARNA7  | -2.22 | 1.02  | -2.26 | 1.35  | -2.27 | 4.58  | -0.47 | -0.69 | 0.78  | 0.22  | -2.31 | -1.37 |
| 16983266 | .        | -0.49 | -1.65 | -2.46 | 0.02  | 0.93  | 1.01  | 0.46  | 1.29  | -2.78 | -2.22 | 0.20  | 2.09  |
| 16988537 | .        | -0.33 | -1.65 | -3.89 | -1.23 | -1.62 | -1.51 | -0.32 | -1.83 | -1.92 | -3.89 | -1.59 | -2.43 |
| 16989865 | .        | -0.14 | -1.53 | 0.27  | -0.33 | 0.25  | -3.85 | 1.00  | 0.48  | -2.07 | -0.96 | 0.37  | 2.26  |
| 16990120 | .        | 0.43  | -0.50 | -0.10 | 0.49  | -0.23 | 1.08  | -1.18 | -0.86 | 3.68  | -0.71 | -0.81 | -0.84 |
| 16997644 | .        | -2.33 | -0.44 | 1.61  | 0.42  | -1.00 | 1.41  | 1.34  | 0.96  | -2.05 | -1.88 | 0.06  | -2.11 |
| 17006290 | .        | 1.47  | 0.06  | 0.63  | 0.72  | 1.58  | -1.62 | 0.80  | 0.22  | 1.19  | -1.40 | 0.10  | -2.06 |
| 17006294 | .        | 0.32  | -0.34 | 0.60  | -0.01 | 0.12  | -2.54 | 0.08  | 0.19  | 1.14  | -1.31 | -0.60 | 0.76  |
| 17006295 | .        | 0.09  | -1.23 | -0.02 | -0.10 | -0.02 | -0.46 | 0.76  | 0.11  | 1.33  | -1.11 | -1.22 | 0.81  |
| 17006296 | .        | 0.77  | -0.84 | 1.34  | 0.08  | -0.22 | -4.68 | -0.40 | -0.41 | 0.61  | -1.76 | -0.16 | -2.33 |
| 17006305 | .        | -1.21 | -2.08 | -3.30 | -0.83 | -0.24 | -3.51 | 0.53  | -0.03 | 3.19  | -0.58 | 0.50  | -2.34 |
| 17006306 | .        | -1.29 | -2.60 | 1.21  | -1.64 | -1.04 | -1.34 | 1.53  | 0.71  | 6.02  | -3.72 | -0.03 | 0.88  |
| 17006308 | .        | -1.59 | -0.44 | -0.42 | -1.35 | 1.21  | -1.30 | 1.34  | 0.23  | 2.20  | -0.74 | 0.88  | -0.17 |
| 17016372 | HIST1H1C | 0.08  | -0.18 | 0.24  | -0.26 | 0.75  | 0.96  | 0.23  | 1.16  | 2.01  | 1.11  | 0.67  | -1.34 |
| 17016503 | HIST1H3I | -1.23 | -0.39 | 0.52  | -0.69 | 0.25  | -2.58 | -2.26 | 0.08  | 2.78  | 1.23  | -0.45 | -2.91 |
| 17017177 | .        | 0.46  | -0.77 | -0.49 | -0.64 | 0.78  | -1.45 | -0.08 | 0.09  | 1.33  | 0.98  | 1.09  | 0.10  |
| 17017194 | .        | -4.83 | -0.81 | 3.34  | 1.08  | 1.27  | -0.88 | 0.46  | -1.11 | 1.99  | 3.95  | 2.61  | 6.54  |
| 17017197 | .        | 0.79  | -0.86 | 1.26  | 0.34  | -0.70 | -2.40 | 0.71  | 0.17  | 5.90  | -1.69 | -0.44 | 4.28  |
| 17018387 | .        | -0.72 | -0.79 | 0.75  | 0.45  | 0.43  | -2.84 | 0.54  | 0.18  | 4.74  | 1.47  | -1.47 | 2.83  |
| 17041697 | .        | -0.22 | -0.69 | -0.07 | 0.24  | 0.01  | -0.35 | 0.64  | -0.11 | 0.59  | -0.51 | -0.69 | 0.82  |
| 17047459 | SNORA14A | 0.97  | 0.71  | 0.06  | -0.40 | -0.72 | 1.03  | 0.76  | 0.13  | -0.29 | 0.05  | -1.28 | -1.48 |
| 17061125 | RASA4B   | -2.13 | 2.69  | -1.90 | -0.58 | 1.01  | 2.04  | -1.45 | -0.85 | -1.78 | 2.23  | 2.23  | -5.88 |
| 17068624 | .        | 0.59  | -0.01 | 0.02  | -0.53 | -0.91 | -0.75 | 0.89  | 1.17  | 0.61  | -0.87 | 0.00  | 3.76  |
| 17100655 | .        | 1.29  | 0.94  | 0.46  | 0.71  | -1.34 | -0.27 | 0.02  | -0.39 | -0.98 | -0.64 | 0.55  | 0.46  |
| 17100810 | .        | -0.09 | -0.69 | -1.52 | -0.15 | 0.19  | 0.05  | 0.30  | -0.34 | 1.35  | -1.05 | 0.92  | 1.48  |
| 17104684 | .        | -0.70 | -0.66 | -0.20 | 0.63  | -1.08 | -1.07 | -0.31 | -0.06 | 0.71  | 0.86  | -0.54 | -0.55 |
| 17118001 | BRK1     | 0.56  | -0.61 | -0.70 | 0.01  | 0.02  | -1.19 | 1.82  | -1.01 | 1.99  | -0.98 | 0.33  | -2.36 |
| 17118426 | .        | -0.65 | 1.14  | 0.11  | 0.20  | -0.12 | 0.01  | -0.64 | 0.36  | 3.42  | 1.35  | 0.40  | 1.57  |
| 17118850 | .        | 0.86  | 1.06  | -0.25 | -0.02 | 0.06  | -0.44 | 0.71  | 0.19  | 3.34  | -0.58 | 0.42  | 2.19  |
| 17120164 | .        | 0.05  | 0.63  | -0.22 | 0.18  | 0.40  | -2.58 | 0.12  | -0.27 | 0.18  | -0.77 | -0.95 | -1.29 |
| 17121378 | .        | -0.70 | -0.30 | -0.05 | -0.18 | 0.43  | -0.41 | 0.42  | -0.10 | 1.79  | -0.27 | 0.62  | -0.61 |
| 17121380 | .        | -0.66 | -1.08 | 0.36  | -0.30 | 0.40  | -0.38 | 0.02  | -0.04 | 1.64  | -0.19 | 0.93  | -1.22 |
| 17121504 | .        | -0.40 | -2.05 | 0.86  | -0.31 | -0.05 | -0.22 | -0.60 | 0.06  | 1.55  | 0.22  | 1.46  | -2.10 |
| 17124336 | .        | -0.62 | -0.21 | -0.57 | 0.10  | -0.90 | 0.52  | 0.81  | 0.41  | 3.06  | -1.17 | 0.92  | 1.55  |
| 17124536 | .        | 2.59  | -1.58 | 0.92  | 0.65  | -0.69 | -5.38 | 0.34  | 2.85  | 5.23  | -2.26 | -1.19 | 2.99  |
| 17124748 | .        | 1.16  | 0.35  | 0.64  | 0.43  | 0.80  | 1.94  | 1.66  | -0.33 | 5.98  | 1.98  | 0.27  | -1.11 |
| 17125856 | .        | -1.10 | -2.39 | -1.27 | -1.52 | 1.35  | -1.96 | -1.24 | 0.15  | 2.78  | -1.58 | -1.19 | 1.53  |
| 17126000 | .        | -1.43 | -1.42 | -2.62 | 0.31  | 0.00  | -1.15 | 1.71  | -0.91 | 3.36  | 1.17  | -2.27 | 0.09  |
| 17126152 | .        | -0.37 | -0.66 | 0.58  | 0.14  | -0.41 | 0.29  | -0.28 | 1.23  | 1.28  | -0.14 | 0.79  | 1.17  |

**Supplementary Table 5. Immunophenotyping of patients (P1, P2 and P3) and a WT homozygous relative.**

|                                             | <b>P1</b> | <b>P2</b> | <b>P3</b> | <b>P1'sister</b> | <b>Normal range</b> |
|---------------------------------------------|-----------|-----------|-----------|------------------|---------------------|
| <b>Phenotype</b>                            | WD        | WD        | WD        | Healthy          |                     |
| <b>IRF4 genotype</b>                        | R98W/WT   | R98W/WT   | R98W/WT   | WT/WT            |                     |
| <b>lymphocytes number/<math>\mu</math>l</b> | 1100      | 2400      | 1200      | 2400             |                     |
| <b>T Lymphocyte Immunophenotyping (%)</b>   |           |           |           |                  |                     |
| <b>CD3+</b>                                 | 71        | 77        | 58        | 77               | 51-82               |
| <b>CD4+</b>                                 | 49        | 42        | 33        | 55               | 31-63               |
| <b>CD8+</b>                                 | 21        | 30        | 25        | 19               | 9-34                |
| <b>CD45RO+/CD4+</b>                         | 48        | 81        | 85        | 40               |                     |
| <b>CD45RA+/CD4+</b>                         | 52        | 19        | 15        | 60               | 20-86               |
| <b>CD31+/CD4+</b>                           | 31        | 17        | 8         | 25               |                     |
| <b>CD31+/CD45RA+/CD4+</b>                   | 24        | 6         | 3         | 20               | 20-28               |
| <b>CCR7+CD45RA+/CD8+</b>                    | 20        | 7         | 6         | 15               | 29-57               |
| <b>CCR7+CD45RA-/CD8+</b>                    | 17        | 7         | 12        | 2                | 3-14                |
| <b>CCR7-CD45RA-/CD8+</b>                    | 39        | 49        | 27        | 44               | 20-41               |
| <b>CCR7-CD45RA+/CD8+</b>                    | 24        | 37        | 55        | 40               | 11-26               |
| <b>B Lymphocyte Immunophenotyping (%)</b>   |           |           |           |                  |                     |
| <b>CD19+</b>                                | 8         | 11        | 6         | 9                | 4-21                |
| <b>NK Lymphocyte Immunophenotyping (%)</b>  |           |           |           |                  |                     |
| <b>CD16+CD56+</b>                           | 21        | 12        | 36        | 12               | 5-33                |
